# Supplementary material for: Mental Health Service Use, Suicide Behavior, and Emergency Department Visits Among Rural US Veterans Who Received Video-Enabled Tablets During the COVID-19 Pandemic
Source: PubMed Central journal article supplement (PMC8987904; doi:10.1001/jamanetworkopen.2022.6250), 2022-04-06

## Supplemental Online Content

Gujral K, Van Campen J, Jacobs J, Kimerling R, Blonigen D, Zulman DM. Mental health service use, suicide behavior, and emergency department visits among US rural veterans who received video-enabled tablets during the COVID-19 pandemic. *JAMA Netw Open*. 2022;5(4):e226250. doi:10.1001/jamanetworkopen.2022.6250

**eFigure 1.** Flow Chart Describing the Construction of Our Cohort and Sub-Cohort

**eTable 1.** Criteria for Identifying Psychotherapy Visits

**eTable 2.** CPT Codes Used as Part of the Criteria for Identifying Psychotherapy Visits

**eTable 3.** Criteria for Identifying Medication Management Visits

**eTable 4.** Mental Health VA E&M Stop Codes, Used as Part of the Criteria for Identifying Medication Management Visits

**eTable 5.** E&M CPT Codes, Used as Part of the Criteria for Identifying Medication Management Visits

**eTable 6.** VA Codes for Providers and Qualified Prescribers, Used as Part of the Criteria for Identifying Medication Management Visits

**eTable 7.** ICD-10 Codes for Identifying Mental Health Conditions, Used as Part of the Criteria for Identifying Psychotherapy and Medication Management Visits

**eTable 8.** ICD-10 Codes Used for Identifying Suicide-Related ED Visits

**eTable 9.** Physical and Mental Health Chronic Condition Included as Covariates

**eAppendix 1.** Methods Details

**eFigure 2.** Tablet Recipients' Visits for Medication Management and CSRES Compared to the Baseline and Compared to Non-Recipients - Regression Coefficients From Event Study Specifications

**eFigure 3.** Unadjusted Average Number of Monthly Visit Outcomes for Rural Tablet Recipients and Rural Tablet Non-Recipients by Calendar Month-Year

This supplemental material has been provided by the authors to give readers additional information about their work.

eFigure 1: Flow chart describing the construction of our cohort and sub-cohort

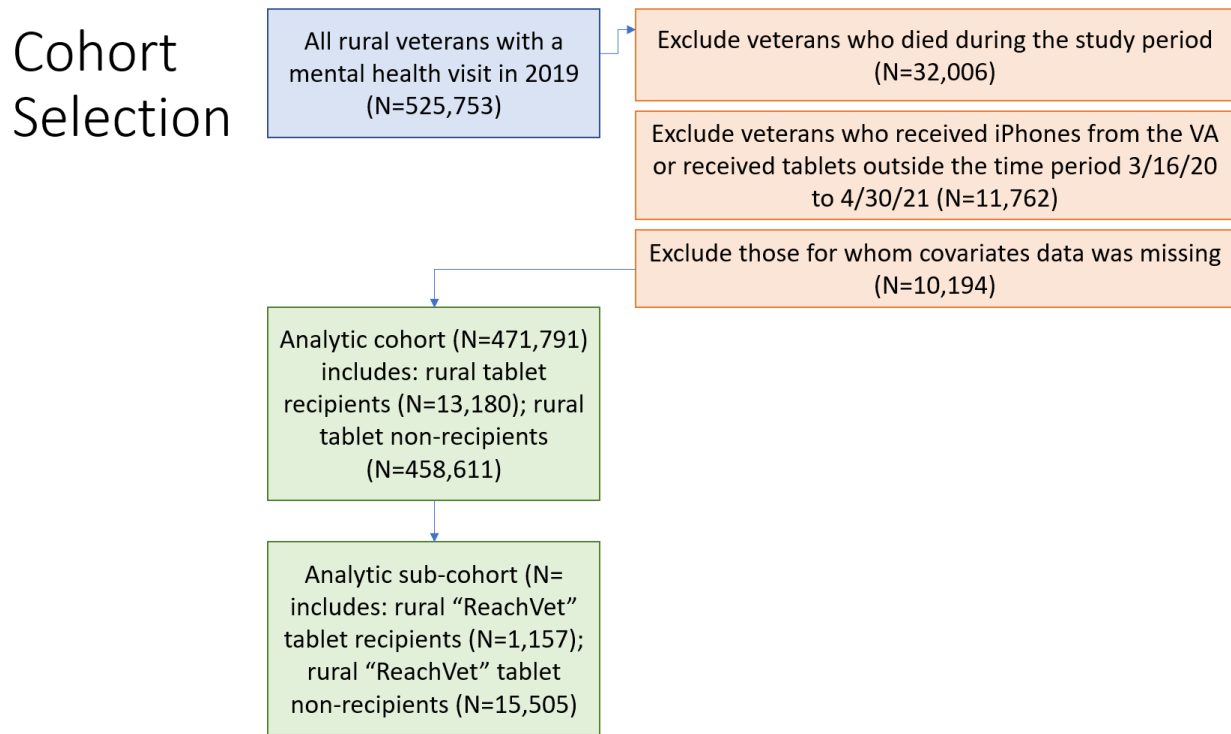

eTable 1: Criteria for identifying psychotherapy visits

| <b>Psychotherapy Visit Criteria:</b>                                          |
|-------------------------------------------------------------------------------|
| Depression Diagnosis and depression current procedural terminology (CPT) code |
| or Serious Mental Illness (SMI) diagnosis and SMI CPT code                    |
| or SUD diagnosis and SUD CPT code                                             |
| or Post-Traumatic Stress Disorder (PTSD) diagnosis and PTSD CPT code          |

eTable 2: CPT codes used as part of the criteria for identifying psychotherapy visits

| <b>CPT Codes for Depression and PTSD</b> |                                                                                  |
|------------------------------------------|----------------------------------------------------------------------------------|
| <b>CPT Code</b>                          | <b>CPT Description</b>                                                           |
| 90791                                    | PSYCHIATRIC DIAGNOSTIC EVALUATION                                                |
| 90832                                    | PSYCHOTHERAPY, 30 MINUTES WITH PATIENT                                           |
| 90834                                    | PSYCHOTHERAPY, 45 MINUTES WITH PATIENT                                           |
| 90837                                    | PSYCHOTHERAPY, 60 MINUTES WITH PATIENT                                           |
| 90839                                    | PSYCHOTHERAPY FOR CRISIS; FIRST 60 MINUTES                                       |
| 90846                                    | FAMILY PSYCHOTHERAPY (WITHOUT THE PATIENT PRESENT), 50 MINUTES                   |
| 90847                                    | FAMILY PSYCHOTHERAPY (CONJOINT PSYCHOTHERAPY) (WITH PATIENT PRESENT), 50 MINUTES |

|                                  |                                                                                                                                                                                                                                               |
|----------------------------------|-----------------------------------------------------------------------------------------------------------------------------------------------------------------------------------------------------------------------------------------------|
| 90849                            | MULTIPLE-FAMILY GROUP PSYCHOTHERAPY                                                                                                                                                                                                           |
| 90853                            | GROUP PSYCHOTHERAPY (OTHER THAN OF A MULTIPLE-FAMILY GROUP)                                                                                                                                                                                   |
| <b>CPT Codes for SMI</b>         |                                                                                                                                                                                                                                               |
| <b>CPT Code</b>                  | <b>CPT Description</b>                                                                                                                                                                                                                        |
| 90791                            | PSYCHIATRIC DIAGNOSTIC EVALUATION                                                                                                                                                                                                             |
| 90832                            | PSYCHOTHERAPY, 30 MINUTES WITH PATIENT                                                                                                                                                                                                        |
| 90834                            | PSYCHOTHERAPY, 45 MINUTES WITH PATIENT                                                                                                                                                                                                        |
| 90837                            | PSYCHOTHERAPY, 60 MINUTES WITH PATIENT                                                                                                                                                                                                        |
| 90839                            | PSYCHOTHERAPY FOR CRISIS; FIRST 60 MINUTES                                                                                                                                                                                                    |
| 90846                            | FAMILY PSYCHOTHERAPY (WITHOUT THE PATIENT PRESENT), 50 MINUTES                                                                                                                                                                                |
| 90847                            | FAMILY PSYCHOTHERAPY (CONJOINT PSYCHOTHERAPY) (WITH PATIENT PRESENT), 50 MINUTES                                                                                                                                                              |
| 90849                            | MULTIPLE-FAMILY GROUP PSYCHOTHERAPY                                                                                                                                                                                                           |
| 90853                            | GROUP PSYCHOTHERAPY (OTHER THAN OF A MULTIPLE-FAMILY GROUP)                                                                                                                                                                                   |
| 98961                            | EDUCATION AND TRAINING FOR PATIENT SELF-MANAGEMENT BY A QUALIFIED, NONPHYSICIAN HEALTH CARE PROFESSIONAL USING A STANDARDIZED CURRICULUM, FACE-TO-FACE WITH THE PATIENT (COULD INCLUDE CAREGIVER/FAMILY) EACH 30 MINUTES; 2-4 PATIENTS        |
| 98962                            | EDUCATION AND TRAINING FOR PATIENT SELF-MANAGEMENT BY A QUALIFIED, NONPHYSICIAN HEALTH CARE PROFESSIONAL USING A STANDARDIZED CURRICULUM, FACE-TO-FACE WITH THE PATIENT (COULD INCLUDE CAREGIVER/FAMILY) EACH 30 MINUTES; 5-8 PATIENTS        |
| 99078                            | PHYSICIAN OR OTHER QUALIFIED HEALTH CARE PROFESSIONAL QUALIFIED BY EDUCATION, TRAINING, LICENSURE/REGULATION (WHEN APPLICABLE) EDUCATIONAL SERVICES RENDERED TO PATIENTS IN A GROUP SETTING (EG, PRENATAL, OBESITY, OR DIABETIC INSTRUCTIONS) |
| 99509                            | HOME VISIT FOR ASSISTANCE WITH ACTIVITIES OF DAILY LIVING AND PERSONAL CARE                                                                                                                                                                   |
| 99510                            | HOME VISIT FOR INDIVIDUAL, FAMILY, OR MARRIAGE COUNSELING                                                                                                                                                                                     |
| <b>CPT Codes for SUD (PSY36)</b> |                                                                                                                                                                                                                                               |
| <b>CP TCode</b>                  | <b>CPT Description</b>                                                                                                                                                                                                                        |
| 90791                            | PSYCHIATRIC DIAGNOSTIC EVALUATION                                                                                                                                                                                                             |
| 90832                            | PSYCHOTHERAPY, 30 MINUTES WITH PATIENT                                                                                                                                                                                                        |
| 90834                            | PSYCHOTHERAPY, 45 MINUTES WITH PATIENT                                                                                                                                                                                                        |
| 90837                            | PSYCHOTHERAPY, 60 MINUTES WITH PATIENT                                                                                                                                                                                                        |
| 90839                            | PSYCHOTHERAPY FOR CRISIS; FIRST 60 MINUTES                                                                                                                                                                                                    |
| 90846                            | FAMILY PSYCHOTHERAPY (WITHOUT THE PATIENT PRESENT), 50 MINUTES                                                                                                                                                                                |
| 90847                            | FAMILY PSYCHOTHERAPY (CONJOINT PSYCHOTHERAPY) (WITH PATIENT PRESENT), 50 MINUTES                                                                                                                                                              |
| 90849                            | MULTIPLE-FAMILY GROUP PSYCHOTHERAPY                                                                                                                                                                                                           |
| 90853                            | GROUP PSYCHOTHERAPY (OTHER THAN OF A MULTIPLE-FAMILY GROUP)                                                                                                                                                                                   |
| 99078                            | PHYSICIAN OR OTHER QUALIFIED HEALTH CARE PROFESSIONAL QUALIFIED BY EDUCATION, TRAINING, LICENSURE/REGULATION (WHEN APPLICABLE) EDUCATIONAL SERVICES RENDERED TO PATIENTS IN A GROUP SETTING (EG, PRENATAL, OBESITY, OR DIABETIC INSTRUCTIONS) |

eTable 3: Criteria for identifying medication management visits

| Medication Management Visit Criteria:                                                                                                             |
|---------------------------------------------------------------------------------------------------------------------------------------------------|
| Provider is either:                                                                                                                               |
| a psychiatrist                                                                                                                                    |
| or another qualified prescriber and the visit has a mental health evaluation and management (E&M) stop code in the primary or secondary position. |
| Visit has E&M CPT code                                                                                                                            |
| Mental health or Substance Use Disorder (SUD) diagnosis.                                                                                          |

eTable 4: Mental health VA E&M stop codes, used as part of the criteria for identifying medication management visits

| Mental Health E&M Stop Codes |                                                             |
|------------------------------|-------------------------------------------------------------|
| VA 3-digit Stop Code         | Stop Code Name                                              |
| 156                          | HBPC - PSYCHOLOGIST                                         |
| 157                          | HBPC - PSYCHIATRIST                                         |
| 292                          | OBSERVATION PSYCHIATRY                                      |
| 502                          | MENTAL HEALTH CLINIC - INDIVIDUAL                           |
| 503                          | MENTAL HEALTH RESIDENTIAL CARE - INDIVIDUAL                 |
| 505                          | DAY TREATMENT - INDIVIDUAL                                  |
| 506                          | DAY HOSPITAL - INDIVIDUAL                                   |
| 509                          | PSYCHIATRY                                                  |
| 510                          | PSYCHOLOGY                                                  |
| 512                          | MENTAL HEALTH CONSULTATION                                  |
| 513                          | SUBSTANCE USE DISORDER - INDIVIDUAL                         |
| 514                          | SUBSTANCE USE DISORDER - HOME VISIT                         |
| 516                          | PTSD - GROUP                                                |
| 519                          | SUBSTANCE USE DISORDER/PTSD TEAMS                           |
| 523                          | OPIOID TREATMENT PROGRAM                                    |
| 524                          | ACTIVE DUTY SEXUAL TRAUMA                                   |
| 525                          | WOMEN'S STRESS DISORDER TREATMENT TEAMS                     |
| 527                          | TELEPHONE MENTAL HEALTH                                     |
| 531                          | MENTAL HEALTH PRIMARY CARE - INDIVIDUAL                     |
| 533                          | MENTAL HEALTH INTERVENTION BIOMEDICAL CARE - INDIVIDUAL     |
| 534                          | MENTAL HEALTH INTEGRATED CARE - INDIVIDUAL                  |
| 535                          | MENTAL HEALTH VOCATIONAL ASSISTANCE - INDIVIDUAL            |
| 536                          | TELEPHONE MENTAL HEALTH VOCATIONAL ASSISTANCE               |
| 538                          | PSYCHOLOGICAL TESTING                                       |
| 539                          | MENTAL HEALTH INTEGRATED CARE - GROUP                       |
| 540                          | PTSD CLINICAL TEAM (PCT) POST-TRAUMATIC STRESS - INDIVIDUAL |
| 542                          | TELEPHONE/POST-TRAUMATIC STRESS DISORDER (PTSD)             |
| 545                          | TELEPHONE/SUBSTANCE USE DISORDER                            |

|     |                                                                                            |
|-----|--------------------------------------------------------------------------------------------|
| 546 | TELEPHONE INTENSIVE COMMUNITY MENTAL HEALTH RECOVERY SERVICES (ICMHR)                      |
| 547 | INTENSIVE SUBSTANCE USE DISORDER - GROUP                                                   |
| 548 | INTENSIVE SUBSTANCE USE DISORDER - INDIVIDUAL                                              |
| 550 | MENTAL HEALTH CLINIC - GROUP                                                               |
| 552 | INTENSIVE COMMUNITY MENTAL HEALTH RECOVERY SERVICES (ICMHR)-INDIVIDUAL                     |
| 553 | DAY TREATMENT - GROUP                                                                      |
| 554 | DAY HOSPITAL - GROUP                                                                       |
| 555 | HOMELESS VETERAN COMMUNITY EMPLOYMENT SERVICES - INDIVIDUAL                                |
| 556 | HOMELESS VETERAN COMMUNITY EMPLOYMENT SERVICES - GROUP                                     |
| 557 | PSYCHIATRY - GROUP                                                                         |
| 558 | PSYCHOLOGY - GROUP                                                                         |
| 560 | SUBSTANCE USE DISORDER - GROUP                                                             |
| 561 | PCT-POST TRAUMATIC STRESS - GROUP                                                          |
| 562 | PTSD - INDIVIDUAL                                                                          |
| 564 | MENTAL HEALTH TEAM CASE MANAGEMENT                                                         |
| 565 | MENTAL HEALTH INTERVENTION BIOMEDICAL CARE - GROUP                                         |
| 566 | MENTAL HEALTH RISK-FACTOR REDUCTION EDUCATIONAL GROUP                                      |
| 567 | INTENSIVE COMMUNITY MENTAL HEALTH RECOVERY SERVICES (ICMHR)- GROUP                         |
| 568 | MENTAL HEALTH COMPENSATED WORK THERAPY/ SUPPORTED EMPLOYMENT (CWT/SE) FACE-TO-FACE         |
| 571 | SERV-MH (SERVICES FOR RETURNING VETERANS-MENTAL HEALTH) - INDIVIDUAL                       |
| 572 | SERV-MH (SERVICES FOR RETURNING VETERANS-MENTAL HEALTH) - GROUP                            |
| 573 | MENTAL HEALTH INCENTIVE THERAPY FACE-TO-FACE                                               |
| 574 | MENTAL HEALTH COMPENSATED WORK THERAPY/TRANSITIONAL WORK EXPERIENCE (CWT/TWE) FACE-TO-FACE |
| 575 | MENTAL HEALTH VOCATIONAL ASSISTANCE - GROUP                                                |
| 576 | PSYCHOGERIATRIC CLINIC - INDIVIDUAL                                                        |
| 577 | PSYCHOGERIATRIC CLINIC - GROUP                                                             |
| 579 | TELEPHONE/PSYCHOGERIATRICALS                                                               |
| 580 | PTSD DAY HOSPITAL                                                                          |
| 582 | PSYCHOSOCIAL REHABILITATION RECOVERY CENTER (PRRC) - INDIVIDUAL                            |
| 583 | PSYCHOSOCIAL REHABILITATION RECOVERY CENTER (PRRC)- GROUP                                  |
| 584 | TELEPHONE PSYCHOSOCIAL REHABILITATION RECOVERY CENTER (PRRC)                               |
| 586 | RESIDENTIAL REHABILITATION TREATMENT PROGRAM (RRTP) - INDIVIDUAL                           |
| 587 | RESIDENTIAL REHABILITATION TREATMENT PROGRAM (RRTP) - GROUP                                |
| 588 | RESIDENTIAL REHABILITATION TREATMENT PROGRAM (RRTP) AFTERCARE - INDIVIDUAL                 |
| 593 | RESIDENTIAL REHABILITATION TREATMENT PROGRAM (RRTP) OUTREACH SERVICES                      |
| 595 | RESIDENTIAL REHABILITATION TREATMENT PROGRAM (RRTP) AFTERCARE - GROUP                      |
| 596 | RESIDENTIAL REHABILITATION TREATMENT PROGRAM (RRTP) ADMISSION SCREENING SERVICES           |

|     |                                                                             |
|-----|-----------------------------------------------------------------------------|
| 597 | TELEPHONE/RESIDENTIAL REHABILITATION TREATMENT PROGRAM (RRTP)               |
| 598 | RESIDENTIAL REHABILITATION TREATMENT PROGRAM (RRTP) OUTPATIENT – INDIVIDUAL |
| 599 | RESIDENTIAL REHABILITATION TREATMENT PROGRAM (RRTP) OUTPATIENT – GROUP      |
| 713 | GAMBLING ADDICTION                                                          |

eTable 5: E&M CPT codes, used as part of the criteria for identifying medication management visits

| E&M CPT Codes |                                                                                                                                                                                                                                                                                                                       |
|---------------|-----------------------------------------------------------------------------------------------------------------------------------------------------------------------------------------------------------------------------------------------------------------------------------------------------------------------|
| CPT Code      | CPT Description                                                                                                                                                                                                                                                                                                       |
| 90792         | PSYCHIATRIC DIAGNOSTIC EVALUATION WITH MEDICAL SERVICES                                                                                                                                                                                                                                                               |
| 90863         | PHARMACOLOGIC MANAGEMENT, INCLUDING PRESCRIPTION AND REVIEW OF MEDICATION, WHEN PERFORMED WITH PSYCHOTHERAPY SERVICES (LIST SEPARATELY IN ADDITION TO THE CODE FOR PRIMARY PROCEDURE)                                                                                                                                 |
| 99202         | OFFICE OR OTHER OUTPATIENT VISIT FOR THE EVALUATION AND MANAGEMENT OF A NEW PATIENT, WHICH REQUIRES A MEDICALLY APPROPRIATE HISTORY AND/OR EXAMINATION AND STRAIGHTFORWARD MEDICAL DECISION MAKING. WHEN USING TIME FOR CODE SELECTION, 15-29 MINUTES OF TOTAL TIME IS SPENT ON THE DATE OF THE ENCOUNTER.            |
| 99203         | OFFICE OR OTHER OUTPATIENT VISIT FOR THE EVALUATION AND MANAGEMENT OF A NEW PATIENT, WHICH REQUIRES A MEDICALLY APPROPRIATE HISTORY AND/OR EXAMINATION AND LOW LEVEL OF MEDICAL DECISION MAKING. WHEN USING TIME FOR CODE SELECTION, 30-44 MINUTES OF TOTAL TIME IS SPENT ON THE DATE OF THE ENCOUNTER.               |
| 99204         | OFFICE OR OTHER OUTPATIENT VISIT FOR THE EVALUATION AND MANAGEMENT OF A NEW PATIENT, WHICH REQUIRES A MEDICALLY APPROPRIATE HISTORY AND/OR EXAMINATION AND MODERATE LEVEL OF MEDICAL DECISION MAKING. WHEN USING TIME FOR CODE SELECTION, 45-59 MINUTES OF TOTAL TIME IS SPENT ON THE DATE OF THE ENCOUNTER.          |
| 99205         | OFFICE OR OTHER OUTPATIENT VISIT FOR THE EVALUATION AND MANAGEMENT OF A NEW PATIENT, WHICH REQUIRES A MEDICALLY APPROPRIATE HISTORY AND/OR EXAMINATION AND HIGH LEVEL OF MEDICAL DECISION MAKING. WHEN USING TIME FOR CODE SELECTION, 60-74 MINUTES OF TOTAL TIME IS SPENT ON THE DATE OF THE ENCOUNTER.              |
| 99213         | OFFICE OR OTHER OUTPATIENT VISIT FOR THE EVALUATION AND MANAGEMENT OF AN ESTABLISHED PATIENT, WHICH REQUIRES A MEDICALLY APPROPRIATE HISTORY AND/OR EXAMINATION AND LOW LEVEL OF MEDICAL DECISION MAKING. WHEN USING TIME FOR CODE SELECTION, 20-29 MINUTES OF TOTAL TIME IS SPENT ON THE DATE OF THE ENCOUNTER.      |
| 99214         | OFFICE OR OTHER OUTPATIENT VISIT FOR THE EVALUATION AND MANAGEMENT OF AN ESTABLISHED PATIENT, WHICH REQUIRES A MEDICALLY APPROPRIATE HISTORY AND/OR EXAMINATION AND MODERATE LEVEL OF MEDICAL DECISION MAKING. WHEN USING TIME FOR CODE SELECTION, 30-39 MINUTES OF TOTAL TIME IS SPENT ON THE DATE OF THE ENCOUNTER. |

|       |                                                                                                                                                                                                                                                                                                                                                                                                                                                                                                                                                                                                                                       |
|-------|---------------------------------------------------------------------------------------------------------------------------------------------------------------------------------------------------------------------------------------------------------------------------------------------------------------------------------------------------------------------------------------------------------------------------------------------------------------------------------------------------------------------------------------------------------------------------------------------------------------------------------------|
| 99215 | OFFICE OR OTHER OUTPATIENT VISIT FOR THE EVALUATION AND MANAGEMENT OF AN ESTABLISHED PATIENT, WHICH REQUIRES A MEDICALLY APPROPRIATE HISTORY AND/OR EXAMINATION AND HIGH LEVEL OF MEDICAL DECISION MAKING. WHEN USING TIME FOR CODE SELECTION, 40-54 MINUTES OF TOTAL TIME IS SPENT ON THE DATE OF THE ENCOUNTER.                                                                                                                                                                                                                                                                                                                     |
| 99342 | HOME VISIT FOR THE EVALUATION AND MANAGEMENT OF A NEW PATIENT, WHICH REQUIRES THESE 3 KEY COMPONENTS: AN EXPANDED PROBLEM FOCUSED HISTORY; AN EXPANDED PROBLEM FOCUSED EXAMINATION; AND MEDICAL DECISION MAKING OF LOW COMPLEXITY. COUNSELING AND/OR COORDINATION OF CARE WITH OTHER PHYSICIANS, OTHER QUALIFIED HEALTH CARE PROFESSIONALS, OR AGENCIES ARE PROVIDED CONSISTENT WITH THE NATURE OF THE PROBLEM(S) AND THE PATIENT'S AND/OR FAMILY'S NEEDS. USUALLY, THE PRESENTING PROBLEM(S) ARE OF MODERATE SEVERITY. TYPICALLY, 30 MINUTES ARE SPENT FACE-TO-FACE WITH THE PATIENT AND/OR FAMILY.                                  |
| 99343 | HOME VISIT FOR THE EVALUATION AND MANAGEMENT OF A NEW PATIENT, WHICH REQUIRES THESE 3 KEY COMPONENTS: A DETAILED HISTORY; A DETAILED EXAMINATION; AND MEDICAL DECISION MAKING OF MODERATE COMPLEXITY. COUNSELING AND/OR COORDINATION OF CARE WITH OTHER PHYSICIANS, OTHER QUALIFIED HEALTH CARE PROFESSIONALS, OR AGENCIES ARE PROVIDED CONSISTENT WITH THE NATURE OF THE PROBLEM(S) AND THE PATIENT'S AND/OR FAMILY'S NEEDS. USUALLY, THE PRESENTING PROBLEM(S) ARE OF MODERATE TO HIGH SEVERITY. TYPICALLY, 45 MINUTES ARE SPENT FACE-TO-FACE WITH THE PATIENT AND/OR FAMILY.                                                       |
| 99344 | HOME VISIT FOR THE EVALUATION AND MANAGEMENT OF A NEW PATIENT, WHICH REQUIRES THESE 3 KEY COMPONENTS: A COMPREHENSIVE HISTORY; A COMPREHENSIVE EXAMINATION; AND MEDICAL DECISION MAKING OF MODERATE COMPLEXITY. COUNSELING AND/OR COORDINATION OF CARE WITH OTHER PHYSICIANS, OTHER QUALIFIED HEALTH CARE PROFESSIONALS, OR AGENCIES ARE PROVIDED CONSISTENT WITH THE NATURE OF THE PROBLEM(S) AND THE PATIENT'S AND/OR FAMILY'S NEEDS. USUALLY, THE PRESENTING PROBLEM(S) ARE OF HIGH SEVERITY. TYPICALLY, 60 MINUTES ARE SPENT FACE-TO-FACE WITH THE PATIENT AND/OR FAMILY.                                                         |
| 99345 | HOME VISIT FOR THE EVALUATION AND MANAGEMENT OF A NEW PATIENT, WHICH REQUIRES THESE 3 KEY COMPONENTS: A COMPREHENSIVE HISTORY; A COMPREHENSIVE EXAMINATION; AND MEDICAL DECISION MAKING OF HIGH COMPLEXITY. COUNSELING AND/OR COORDINATION OF CARE WITH OTHER PHYSICIANS, OTHER QUALIFIED HEALTH CARE PROFESSIONALS, OR AGENCIES ARE PROVIDED CONSISTENT WITH THE NATURE OF THE PROBLEM(S) AND THE PATIENT'S AND/OR FAMILY'S NEEDS. USUALLY, THE PATIENT IS UNSTABLE OR HAS DEVELOPED A SIGNIFICANT NEW PROBLEM REQUIRING IMMEDIATE PHYSICIAN ATTENTION. TYPICALLY, 75 MINUTES ARE SPENT FACE-TO-FACE WITH THE PATIENT AND/OR FAMILY. |

|       |                                                                                                                                                                                                                                                                                                                                                                                                                                                                                                                                                                                                                                                                                                                                                    |
|-------|----------------------------------------------------------------------------------------------------------------------------------------------------------------------------------------------------------------------------------------------------------------------------------------------------------------------------------------------------------------------------------------------------------------------------------------------------------------------------------------------------------------------------------------------------------------------------------------------------------------------------------------------------------------------------------------------------------------------------------------------------|
| 99348 | HOME VISIT FOR THE EVALUATION AND MANAGEMENT OF AN ESTABLISHED PATIENT, WHICH REQUIRES AT LEAST 2 OF THESE 3 KEY COMPONENTS: AN EXPANDED PROBLEM FOCUSED INTERVAL HISTORY; AN EXPANDED PROBLEM FOCUSED EXAMINATION; MEDICAL DECISION MAKING OF LOW COMPLEXITY. COUNSELING AND/OR COORDINATION OF CARE WITH OTHER PHYSICIANS, OTHER QUALIFIED HEALTH CARE PROFESSIONALS, OR AGENCIES ARE PROVIDED CONSISTENT WITH THE NATURE OF THE PROBLEM(S) AND THE PATIENT'S AND/OR FAMILY'S NEEDS. USUALLY, THE PRESENTING PROBLEM(S) ARE OF LOW TO MODERATE SEVERITY. TYPICALLY, 25 MINUTES ARE SPENT FACE-TO-FACE WITH THE PATIENT AND/OR FAMILY.                                                                                                            |
| 99349 | HOME VISIT FOR THE EVALUATION AND MANAGEMENT OF AN ESTABLISHED PATIENT, WHICH REQUIRES AT LEAST 2 OF THESE 3 KEY COMPONENTS: A DETAILED INTERVAL HISTORY; A DETAILED EXAMINATION; MEDICAL DECISION MAKING OF MODERATE COMPLEXITY. COUNSELING AND/OR COORDINATION OF CARE WITH OTHER PHYSICIANS, OTHER QUALIFIED HEALTH CARE PROFESSIONALS, OR AGENCIES ARE PROVIDED CONSISTENT WITH THE NATURE OF THE PROBLEM(S) AND THE PATIENT'S AND/OR FAMILY'S NEEDS. USUALLY, THE PRESENTING PROBLEM(S) ARE MODERATE TO HIGH SEVERITY. TYPICALLY, 40 MINUTES ARE SPENT FACE-TO-FACE WITH THE PATIENT AND/OR FAMILY.                                                                                                                                           |
| 99350 | HOME VISIT FOR THE EVALUATION AND MANAGEMENT OF AN ESTABLISHED PATIENT, WHICH REQUIRES AT LEAST 2 OF THESE 3 KEY COMPONENTS: A COMPREHENSIVE INTERVAL HISTORY; A COMPREHENSIVE EXAMINATION; MEDICAL DECISION MAKING OF MODERATE TO HIGH COMPLEXITY. COUNSELING AND/OR COORDINATION OF CARE WITH OTHER PHYSICIANS, OTHER QUALIFIED HEALTH CARE PROFESSIONALS, OR AGENCIES ARE PROVIDED CONSISTENT WITH THE NATURE OF THE PROBLEM(S) AND THE PATIENT'S AND/OR FAMILY'S NEEDS. USUALLY, THE PRESENTING PROBLEM(S) ARE OF MODERATE TO HIGH SEVERITY. THE PATIENT MAY BE UNSTABLE OR MAY HAVE DEVELOPED A SIGNIFICANT NEW PROBLEM REQUIRING IMMEDIATE PHYSICIAN ATTENTION. TYPICALLY, 60 MINUTES ARE SPENT FACE-TO-FACE WITH THE PATIENT AND/OR FAMILY. |
| 99442 | TELEPHONE EVALUATION AND MANAGEMENT SERVICE BY A PHYSICIAN OR OTHER QUALIFIED HEALTH CARE PROFESSIONAL WHO MAY REPORT EVALUATION AND MANAGEMENT SERVICES PROVIDED TO AN ESTABLISHED PATIENT, PARENT, OR GUARDIAN NOT ORIGINATING FROM A RELATED E/M SERVICE PROVIDED WITHIN THE PREVIOUS 7 DAYS NOR LEADING TO AN E/M SERVICE OR PROCEDURE WITHIN THE NEXT 24 HOURS OR SOONEST AVAILABLE APPOINTMENT; 11-20 MINUTES OF MEDICAL DISCUSSION                                                                                                                                                                                                                                                                                                          |
| 99443 | TELEPHONE EVALUATION AND MANAGEMENT SERVICE BY A PHYSICIAN OR OTHER QUALIFIED HEALTH CARE PROFESSIONAL WHO MAY REPORT EVALUATION AND MANAGEMENT SERVICES PROVIDED TO AN ESTABLISHED PATIENT, PARENT, OR GUARDIAN NOT ORIGINATING FROM A RELATED E/M SERVICE PROVIDED WITHIN THE PREVIOUS 7 DAYS NOR LEADING TO AN E/M SERVICE OR PROCEDURE WITHIN THE NEXT 24 HOURS OR SOONEST AVAILABLE APPOINTMENT; 21-30 MINUTES OF MEDICAL DISCUSSION                                                                                                                                                                                                                                                                                                          |
| 99605 | MEDICATION THERAPY MANAGEMENT SERVICE(S) PROVIDED BY A PHARMACIST, INDIVIDUAL, FACE-TO-FACE WITH PATIENT, WITH ASSESSMENT AND INTERVENTION IF PROVIDED; INITIAL 15 MINUTES, NEW PATIENT                                                                                                                                                                                                                                                                                                                                                                                                                                                                                                                                                            |



|       |                                                                                                                                                                                                                                              |
|-------|----------------------------------------------------------------------------------------------------------------------------------------------------------------------------------------------------------------------------------------------|
| 99606 | MEDICATION THERAPY MANAGEMENT SERVICE(S) PROVIDED BY A PHARMACIST, INDIVIDUAL, FACE-TO-FACE WITH PATIENT, WITH ASSESSMENT AND INTERVENTION IF PROVIDED; INITIAL 15 MINUTES, ESTABLISHED PATIENT                                              |
| 99607 | MEDICATION THERAPY MANAGEMENT SERVICE(S) PROVIDED BY A PHARMACIST, INDIVIDUAL, FACE-TO-FACE WITH PATIENT, WITH ASSESSMENT AND INTERVENTION IF PROVIDED; EACH ADDITIONAL 15 MINUTES (LIST SEPARATELY IN ADDITION TO CODE FOR PRIMARY SERVICE) |

eTable 6: VA codes for providers and qualified prescribers, used as part of the criteria for identifying medication management visits

| <b>VA Codes for Psychiatrists</b>           |                        |                                                    |
|---------------------------------------------|------------------------|----------------------------------------------------|
| <b>VA Code</b>                              | <b>Classification</b>  | <b>Area of Specialization</b>                      |
| V180506                                     | Pediatrics             | Child Abuse Pediatrics                             |
| V180701                                     | Family Medicine        | Addiction Medicine                                 |
| V181001                                     | Internal Medicine      | Addiction Medicine                                 |
| V182901                                     | Psychiatry & Neurology | Addiction Medicine                                 |
| V182902                                     | Psychiatry & Neurology | Addiction Psychiatry                               |
| V182903                                     | Psychiatry & Neurology | Child & Adolescent Psychiatry                      |
| V182905                                     | Psychiatry & Neurology | Forensic Psychiatry                                |
| V182906                                     | Psychiatry & Neurology | Geriatric Psychiatry                               |
| V182911                                     | Psychiatry & Neurology | Psychiatry                                         |
| V182914                                     | Psychiatry & Neurology | Behavioral Neurology & Neuropsychiatry             |
| V182918                                     | Psychiatry & Neurology | Hospice and Palliative Medicine                    |
| V182920                                     | Psychiatry & Neurology | Psychosomatic Medicine                             |
| V182921                                     | Psychiatry & Neurology | Sleep Medicine                                     |
| <b>VA Codes Other Qualified Prescribers</b> |                        |                                                    |
| <b>VA Code</b>                              | <b>Classification</b>  | <b>Area of Specialization</b>                      |
| V070100                                     | Clinical Specialist    | NULL                                               |
| V070102                                     | Clinical Specialist    | Child and Adolescent Psychiatric and Mental Health |
| V070103                                     | Clinical Specialist    | Community Health Nursing                           |
| V070104                                     | Clinical Specialist    | Gerontological Nursing                             |
| V070105                                     | Clinical Specialist    | Medical-Surgical Nursing                           |
| V070500                                     | Nurse Practitioner     | NULL                                               |
| V070501                                     | Nurse Practitioner     | Adult Nurse Practitioner                           |
| V070502                                     | Nurse Practitioner     | Family Nurse Practitioner                          |
| V070503                                     | Nurse Practitioner     | Gerontological Nurse Practitioner                  |
| V070504                                     | Nurse Practitioner     | Neonatal Nurse Practitioner                        |
| V070505                                     | Nurse Practitioner     | Obstetrical/Gynecological Nurse Practitioner       |
| V070506                                     | Nurse Practitioner     | Pediatric Nurse Practitioner (PNP)                 |
| V070507                                     | Nurse Practitioner     | School Nurse Practitioner                          |
| V090101                                     | Pharmacist             | General Practice                                   |
| V090102                                     | Pharmacist             | Nuclear                                            |

|         |                           |                                                             |
|---------|---------------------------|-------------------------------------------------------------|
| V090102 | Pharmacist                | Nuclear Pharmacy                                            |
| V090103 | Pharmacist                | Nutrition Support                                           |
| V090104 | Pharmacist                | Pharmacotherapy                                             |
| V090105 | Pharmacist                | Psychiatric                                                 |
| V090105 | Pharmacist                | Psychopharmacy                                              |
| V090106 | Pharmacist                | Pharmacist Clinician (PhC)/<br>Clinical Pharmacy Specialist |
| V090107 | Pharmacist                | Geriatric                                                   |
| V090108 | Pharmacist                | Oncology                                                    |
| V100000 | Physician Assistant       | NULL                                                        |
| V100100 | Physician Assistant       | Medical                                                     |
| V100200 | Physician Assistant       | Surgical                                                    |
| V100300 | Clinical Nurse Specialist | NULL                                                        |
| V100301 | Clinical Nurse Specialist | Acute Care                                                  |
| V100302 | Clinical Nurse Specialist | Adult Health                                                |
| V100303 | Clinical Nurse Specialist | Chronic Care                                                |
| V100304 | Clinical Nurse Specialist | Community Health/Public Health                              |
| V100305 | Clinical Nurse Specialist | Critical Care Medicine                                      |
| V100306 | Clinical Nurse Specialist | Emergency                                                   |
| V100307 | Clinical Nurse Specialist | Ethics                                                      |
| V100308 | Clinical Nurse Specialist | Family Health                                               |
| V100309 | Clinical Nurse Specialist | Gerontology                                                 |
| V100310 | Clinical Nurse Specialist | Holistic                                                    |
| V100311 | Clinical Nurse Specialist | Home Health                                                 |
| V100312 | Clinical Nurse Specialist | Informatics                                                 |
| V100313 | Clinical Nurse Specialist | Long-Term Care                                              |
| V100314 | Clinical Nurse Specialist | Medical-Surgical                                            |
| V100315 | Clinical Nurse Specialist | Neonatal                                                    |
| V100316 | Clinical Nurse Specialist | Neonatal, High-Risk                                         |
| V100317 | Clinical Nurse Specialist | Neuroscience                                                |
| V100318 | Clinical Nurse Specialist | Occupational Health                                         |
| V100319 | Clinical Nurse Specialist | Oncology                                                    |
| V100320 | Clinical Nurse Specialist | Oncology, Pediatrics                                        |
| V100321 | Clinical Nurse Specialist | Pediatrics                                                  |
| V100322 | Clinical Nurse Specialist | Perinatal                                                   |
| V100323 | Clinical Nurse Specialist | Perioperative                                               |
| V100324 | Clinical Nurse Specialist | Psychiatric/Mental Health                                   |
| V100325 | Clinical Nurse Specialist | Psychiatric/Mental Health, Adult                            |
| V100326 | Clinical Nurse Specialist | Psychiatric/Mental Health, Child<br>& Adolescent            |
| V100327 | Clinical Nurse Specialist | Psychiatric/Mental Health, Child<br>& Family                |
| V100328 | Clinical Nurse Specialist | Psychiatric/Mental Health,<br>Chronically Ill               |
| V100329 | Clinical Nurse Specialist | Psychiatric/Mental Health,<br>Community                     |

|         |                                            |                                                               |
|---------|--------------------------------------------|---------------------------------------------------------------|
| V100330 | Clinical Nurse Specialist                  | Psychiatric/Mental Health,<br>Geropsychiatric                 |
| V100331 | Clinical Nurse Specialist                  | Rehabilitation                                                |
| V100332 | Clinical Nurse Specialist                  | Rural Health                                                  |
| V100333 | Clinical Nurse Specialist                  | School                                                        |
| V100334 | Clinical Nurse Specialist                  | Transplantation                                               |
| V100335 | Clinical Nurse Specialist                  | Women's Health                                                |
| V100401 | Advanced Practice Midwife                  | NULL                                                          |
| V100500 | Nurse Anesthetist,<br>Certified Registered | NULL                                                          |
| V100600 | Nurse Practitioner                         | NULL                                                          |
| V100601 | Nurse Practitioner                         | NULL                                                          |
| V100601 | Nurse Practitioner                         | Acute Care                                                    |
| V100602 | Nurse Practitioner                         | Adult Health                                                  |
| V100603 | Nurse Practitioner                         | Community Health                                              |
| V100604 | Nurse Practitioner                         | Critical Care Medicine                                        |
| V100605 | Nurse Practitioner                         | Family                                                        |
| V100606 | Nurse Practitioner                         | Gerontology                                                   |
| V100607 | Nurse Practitioner                         | Neonatal                                                      |
| V100608 | Nurse Practitioner                         | Neonatal, Critical Care                                       |
| V100609 | Nurse Practitioner                         | Obstetrics & Gynecology                                       |
| V100610 | Nurse Practitioner                         | Occupational Health                                           |
| V100611 | Nurse Practitioner                         | Pediatrics                                                    |
| V100612 | Nurse Practitioner                         | Pediatrics: Acute Care                                        |
| V100613 | Nurse Practitioner                         | Pediatrics, Critical Care                                     |
| V100614 | Nurse Practitioner                         | Perinatal                                                     |
| V100615 | Nurse Practitioner                         | Primary Care                                                  |
| V100616 | Nurse Practitioner                         | Psychiatric/Mental Health                                     |
| V100617 | Nurse Practitioner                         | School                                                        |
| V100618 | Nurse Practitioner                         | Adult Health                                                  |
| V100618 | Nurse Practitioner                         | Women's Health                                                |
| V100700 | Anesthesiologist Assistant                 | NULL                                                          |
| V110000 | Internal Medicine                          | NULL                                                          |
| V110000 | Physician/Osteopath                        | NULL                                                          |
| V110100 | Physician/Osteopath                        | Addiction Medicine                                            |
| V110200 | Physician/Osteopath                        | Allergy                                                       |
| V110300 | Physician/Osteopath                        | Allergy & Immunology                                          |
| V110301 | Physician/Osteopath                        | Immunology, Clinical &<br>Laboratory: Allergy &<br>Immunology |
| V110400 | Physician/Osteopath                        | Anesthesiology                                                |
| V110401 | Physician/Osteopath                        | Critical Care Medicine:<br>Anesthesiology                     |
| V110402 | Physician/Osteopath                        | Pain Management -<br>Anesthesiology                           |
| V110403 | Anesthesiology                             | Pediatric Anesthesiology                                      |

|         |                     |                                                         |
|---------|---------------------|---------------------------------------------------------|
| V110403 | Physician/Osteopath | Anesthesiology: Pediatric<br>Anesthesiology             |
| V110404 | Physician/Osteopath | Pain Management                                         |
| V110500 | Physician/Osteopath | Body Imaging                                            |
| V110600 | Physician/Osteopath | Cardiology                                              |
| V110700 | Physician/Osteopath | Dermatology                                             |
| V110701 | Physician/Osteopath | Immunology, Clinical &<br>Laboratory Dermatological     |
| V110702 | Physician/Osteopath | Dermatopathology: Dermatology                           |
| V110703 | Physician/Osteopath | Dermatology: Pediatric<br>Dermatology                   |
| V110800 | Physician/Osteopath | Emergency Medicine                                      |
| V110801 | Physician/Osteopath | Toxicology, Medical: Emergency<br>Medicine              |
| V110802 | Emergency Medicine  | Pediatric Emergency Medicine                            |
| V110803 | Physician/Osteopath | Sports Medicine: Emergency<br>Medicine                  |
| V110804 | Physician/Osteopath | Emergency Medicine: Undersea<br>and Hyperbaric Medicine |
| V110900 | Physician/Osteopath | Family Practice                                         |
| V110901 | Physician/Osteopath | Geriatric Medicine: Family<br>Practice                  |
| V110902 | Physician/Osteopath | Sports Medicine: Family Practice                        |
| V111000 | Physician/Osteopath | General Practice                                        |
| V111100 | Physician/Osteopath | Geriatric Medicine: General<br>Practice                 |
| V111200 | Physician/Osteopath | Hematology & Oncology                                   |
| V111500 | Internal Medicine   | Gastroenterology                                        |
| V111500 | Physician/Osteopath | Internal Medicine                                       |
| V111501 | Physician/Osteopath | Adolescent Medicine: Internal<br>Medicine               |
| V111502 | Physician/Osteopath | Cardiac Electrophysiology                               |
| V111503 | Physician/Osteopath | Cardiovascular Disease                                  |
| V111504 | Physician/Osteopath | Immunology, Clinical &<br>Laboratory: Internal Medicine |
| V111505 | Physician/Osteopath | Critical Care Medicine: Internal<br>Medicine            |
| V111506 | Physician/Osteopath | Endocrinology, Diabetes &<br>Metabolism                 |
| V111507 | Internal Medicine   | Gastroenterology                                        |
| V111507 | Physician/Osteopath | Gastroenterology                                        |
| V111508 | Physician/Osteopath | Geriatric Medicine: Internal<br>Medicine                |
| V111509 | Physician/Osteopath | Hematology: Internal Medicine                           |
| V111510 | Physician/Osteopath | Infectious Diseases                                     |
| V111511 | Physician/Osteopath | Oncology, Medical                                       |

|         |                     |                                                      |
|---------|---------------------|------------------------------------------------------|
| V111512 | Physician/Osteopath | Nephrology                                           |
| V111513 | Physician/Osteopath | Pulmonary Diseases                                   |
| V111514 | Physician/Osteopath | Pulmonary Medicine                                   |
| V111515 | Physician/Osteopath | Rheumatology                                         |
| V111516 | Physician/Osteopath | Sports Medicine: Internal Medicine                   |
| V111517 | Physician/Osteopath | Internal Medicine: Hepatology                        |
| V111518 | Physician/Osteopath | Internal Medicine: Interventional Cardiology         |
| V111519 | Physician/Osteopath | Internal Medicine: Pediatrics                        |
| V111520 | Physician/Osteopath | Internal Medicine: Peripheral Vascular Disease       |
| V111521 | Physician/Osteopath | Internal Medicine: Pulmonary Critical Care Medicine  |
| V111600 | Physician/Osteopath | Laboratory Medicine                                  |
| V111610 | Physician/Osteopath | Legal Medicine                                       |
| V111700 | Legal Medicine      | NULL                                                 |
| V111800 | Physician/Osteopath | Medical Diseases of the Chest                        |
| V111900 | Physician/Osteopath | Genetics, Medical                                    |
| V111901 | Physician/Osteopath | Genetics, Clinical Biochemical                       |
| V111902 | Physician/Osteopath | Genetics, Clinical Biochemical/Molecular             |
| V111903 | Physician/Osteopath | Cytogenetics, Clinical                               |
| V111904 | Physician/Osteopath | Genetics, Clinical (M.D.)                            |
| V111905 | Physician/Osteopath | Genetics, Clinical Molecular                         |
| V111906 | Physician/Osteopath | Medical Genetics: Molecular Genetic Pathology        |
| V112000 | Physician/Osteopath | Neopathology                                         |
| V112100 | Physician/Osteopath | Neurology                                            |
| V112101 | Physician/Osteopath | Neurological Surgery: Pediatric Neurological Surgery |
| V112200 | Physician/Osteopath | Neurology, Child                                     |
| V112300 | Physician/Osteopath | Neuroradiology                                       |
| V112400 | Physician/Osteopath | Nuclear Cardiology                                   |
| V112500 | Physician/Osteopath | Nuclear Imaging & Therapy                            |
| V112600 | Physician/Osteopath | Nuclear Medicine                                     |
| V112601 | Physician/Osteopath | Nuclear Medicine, In Vivo & In Vitro                 |
| V112800 | Physician/Osteopath | Obstetrics                                           |
| V112900 | Physician/Osteopath | Obstetrics & Gynecology                              |
| V112901 | Physician/Osteopath | Critical Care Medicine: OB/GYN                       |
| V112902 | Physician/Osteopath | Oncology, Gynecologic                                |
| V112903 | Physician/Osteopath | Maternal & Fetal Medicine                            |
| V112904 | Physician/Osteopath | Endocrinology, Reproductive                          |
| V113000 | Physician/Osteopath | Ophthalmology                                        |

|         |                     |                                                           |
|---------|---------------------|-----------------------------------------------------------|
| V113001 | Physician/Osteopath | Ophthalmology: Pediatric<br>Ophthalmology                 |
| V113200 | Physician/Osteopath | Osteopathic Manipulative<br>Medicine, Special Proficiency |
| V113300 | Physician/Osteopath | Otolaryngology                                            |
| V113301 | Physician/Osteopath | Otology & Neurotology                                     |
| V113302 | Physician/Osteopath | Pediatric Otolaryngology                                  |
| V113400 | Physician/Osteopath | Otology                                                   |
| V113500 | Physician/Osteopath | Otorhinolaryngology                                       |
| V113600 | Physician/Osteopath | Surgery, Otorhinolaryngology &<br>Facial Plastic Surgery  |
| V113700 | Physician/Osteopath | Pathology                                                 |
| V113701 | Physician/Osteopath | Pathology, Anatomic & Clinical                            |
| V113702 | Physician/Osteopath | Pathology, Anatomic                                       |
| V113703 | Physician/Osteopath | Pathology, Anatomic &<br>Laboratory Medicine              |
| V113704 | Physician/Osteopath | Blood Banking & Transfusion<br>Medicine                   |
| V113705 | Physician/Osteopath | Pathology, Chemical                                       |
| V113706 | Physician/Osteopath | Pathology, Clinical                                       |
| V113707 | Physician/Osteopath | Cytopathology                                             |
| V113708 | Physician/Osteopath | Dermatopathology                                          |
| V113709 | Physician/Osteopath | Forensic Pathology                                        |
| V113710 | Physician/Osteopath | Hematology: Pathology                                     |
| V113711 | Physician/Osteopath | Immunopathology                                           |
| V113712 | Physician/Osteopath | Medical Microbiology                                      |
| V113713 | Physician/Osteopath | Neuropathology                                            |
| V113714 | Physician/Osteopath | Pediatric Pathology                                       |
| V113715 | Physician/Osteopath | Pathology: Selective Pathology                            |
| V113716 | Physician/Osteopath | Pathology: Molecular Genetic<br>Pathology                 |
| V113800 | Physician/Osteopath | Pediatric Allergy & Immunology                            |
| V113900 | Physician/Osteopath | Pediatric Intensive Care                                  |
| V114000 | Physician/Osteopath | Pediatric Neurology                                       |
| V114001 | Physician/Osteopath | Pediatrics: Neurodevelopmental<br>Disabilities            |
| V114002 | Physician/Osteopath | Pediatrics: Developmental -<br>Behavioral Pediatrics      |
| V114100 | Physician/Osteopath | Psychiatry, Pediatric                                     |
| V114200 | Physician/Osteopath | Pediatrics                                                |
| V114201 | Physician/Osteopath | Adolescent Medicine: Pediatrics                           |
| V114202 | Physician/Osteopath | Immunology, Clinical &<br>Laboratory: Pediatric           |
| V114203 | Physician/Osteopath | Pediatric Medical Toxicology                              |
| V114204 | Physician/Osteopath | Neonatal-Perinatal Medicine                               |
| V114205 | Physician/Osteopath | Pediatric Cardiology                                      |

|         |                     |                                                                       |
|---------|---------------------|-----------------------------------------------------------------------|
| V114206 | Physician/Osteopath | Pediatric Critical Care Medicine                                      |
| V114207 | Physician/Osteopath | Pediatric Emergency Medicine                                          |
| V114208 | Physician/Osteopath | Pediatric Endocrinology                                               |
| V114209 | Physician/Osteopath | Pediatric Gastroenterology                                            |
| V114210 | Physician/Osteopath | Pediatric Hematology Oncology                                         |
| V114211 | Physician/Osteopath | Pediatric Infectious Diseases                                         |
| V114212 | Physician/Osteopath | Pediatric Nephrology                                                  |
| V114213 | Physician/Osteopath | Pediatric Pulmonology                                                 |
| V114215 | Physician/Osteopath | Pediatric Rheumatology                                                |
| V114216 | Physician/Osteopath | Sports Medicine: Pediatrics                                           |
| V114300 | Physician/Osteopath | Pediatric Radiology                                                   |
| V114400 | Physician/Osteopath | Pharmacology, Clinical                                                |
| V114500 | Physician/Osteopath | Physical Medicine & Rehabilitation                                    |
| V114501 | Physician/Osteopath | Physical Medicine & Rehabilitation: Pain Management                   |
| V114502 | Physician/Osteopath | Physical Medicine & Rehabilitation: Pediatric Rehabilitation Medicine |
| V114503 | Physician/Osteopath | Physical Medicine & Rehabilitation: Sports Medicine                   |
| V114504 | Physician/Osteopath | Physical Medicine and Rehabilitation: Spinal Cord Injury              |
| V114600 | Physician/Osteopath | Preventive Medicine, General                                          |
| V114601 | Physician/Osteopath | Aerospace Medicine: Preventive Medicine                               |
| V114602 | Physician/Osteopath | Toxicology, Medical: Preventive Medicine                              |
| V114603 | Physician/Osteopath | Occupational Medicine: Preventive Medicine                            |
| V114604 | Physician/Osteopath | Occupational-Environmental Medicine: Preventive Medicine              |
| V114605 | Physician/Osteopath | Public Health & General Preventive Medicine                           |
| V114606 | Physician/Osteopath | Underseas Medicine: Preventive Medicine                               |
| V114607 | Physician/Osteopath | Preventive Medicine: Sports Medicine                                  |
| V114608 | Physician/Osteopath | Preventive Medicine: Undersea and Hyperbaric Medicine                 |
| V114700 | Physician/Osteopath | Proctology                                                            |
| V114800 | Physician/Osteopath | Psychiatry & Neurology                                                |
| V114801 | Physician/Osteopath | Psychiatry, Addiction                                                 |
| V114802 | Physician/Osteopath | Psychiatry, Child & Adolescent                                        |
| V114803 | Physician/Osteopath | Neurophysiology, Clinical                                             |
| V114804 | Physician/Osteopath | Forensic Psychiatry                                                   |
| V114805 | Physician/Osteopath | Psychiatry, Geriatric                                                 |

|         |                          |                                                            |
|---------|--------------------------|------------------------------------------------------------|
| V114806 | Psychiatry and Neurology | Neurology                                                  |
| V114807 | Psychiatry and Neurology | Neurology, Child                                           |
| V114808 | Physician/Osteopath      | Psychiatry                                                 |
| V114809 | Physician/Osteopath      | Psychiatry & Neurology:<br>Neurodevelopmental Disabilities |
| V114810 | Physician/Osteopath      | Psychiatry & Neurology: Pain<br>Management                 |
| V114900 | Physician/Osteopath      | Psychiatry, Child                                          |
| V115000 | Psychoanalysis           | NULL                                                       |
| V115100 | Physician/Osteopath      | Radiation Therapy                                          |
| V115200 | Physician/Osteopath      | Pathology, Radioisotopic                                   |
| V115300 | Physician/Osteopath      | Radiology                                                  |
| V115301 | Physician/Osteopath      | Radiology, Diagnostic                                      |
| V115302 | Physician/Osteopath      | Nuclear Radiology                                          |
| V115303 | Radiology                | Pediatric Radiology                                        |
| V115304 | Physician/Osteopath      | Radiation Oncology                                         |
| V115305 | Physician/Osteopath      | Radiological Physics                                       |
| V115306 | Radiology                | Radiology                                                  |
| V115307 | Physician/Osteopath      | Radiology, Vascular &<br>Interventional                    |
| V115308 | Physician/Osteopath      | Radiology: Abdominal Radiology                             |
| V115309 | Physician/Osteopath      | Radiology: Musculoskeletal<br>Radiology                    |
| V115400 | Physician/Osteopath      | Rehabilitation Medicine                                    |
| V115701 | Physician/Osteopath      | Surgery, General Vascular                                  |
| V115703 | Physician/Osteopath      | Surgery, Pediatric                                         |
| V115704 | Physician/Osteopath      | Surgery, Hand                                              |
| V115705 | Physician/Osteopath      | Surgical Critical Care: Surgery                            |
| V115800 | Physician/Osteopath      | Surgery, Cardiovascular                                    |
| V115900 | Physician/Osteopath      | Surgery, Colon & Rectal Surgery                            |
| V116000 | Physician/Osteopath      | Dermatology Micrographic<br>Surgery                        |
| V116100 | Physician/Osteopath      | Surgery, General                                           |
| V116200 | Physician/Osteopath      | Surgery, Head & Neck                                       |
| V116400 | Physician/Osteopath      | Surgery, Neurological                                      |
| V116500 | Physician/Osteopath      | Surgery, Obstetric & Gynecologic                           |
| V116600 | Physician/Osteopath      | Surgery, Orthopedic                                        |
| V116700 | Physician/Osteopath      | Surgery, Orthopedic, Adult<br>Reconstructive               |
| V116800 | Physician/Osteopath      | Surgery, Hand: Orthopedic<br>Surgery                       |
| V116801 | Physician/Osteopath      | Surgery: Micrographic Surgery                              |
| V116900 | Physician/Osteopath      | Surgery, Orthopedic,<br>Musculoskeletal Oncology           |
| V117000 | Physician/Osteopath      | Surgery, Orthopedic, Pediatric                             |
| V117100 | Physician/Osteopath      | Surgery, Orthopedic, Spine                                 |



|         |                     |                                                           |
|---------|---------------------|-----------------------------------------------------------|
| V117300 | Physician/Osteopath | Surgery, Orthopedic, Trauma                               |
| V117400 | Physician/Osteopath | Surgery, Plastic                                          |
| V117401 | Physician/Osteopath | Surgery, Hand: Plastic Surgery                            |
| V117402 | Physician/Osteopath | Plastic Surgery: Craniofacial Surgery                     |
| V117403 | Physician/Osteopath | Plastic Surgery: Plastic Surgery Within the Head and Neck |
| V117500 | Physician/Osteopath | Surgery, Plastic & Reconstructive                         |
| V117700 | Physician/Osteopath | Surgery, Thoracic                                         |
| V117800 | Physician/Osteopath | Surgery, Thoracic Cardiovascular                          |
| V117900 | Physician/Osteopath | Surgery, Traumatic                                        |
| V118000 | Physician/Osteopath | Surgery, Urological                                       |
| V118100 | Physician/Osteopath | Ultrasound, Diagnostic                                    |
| V118200 | Physician/Osteopath | Urology                                                   |
| V118201 | Physician/Osteopath | Urology, Pediatric Urology                                |
| V118301 | Physician/Osteopath | Adolescent Medicine                                       |
| V118302 | Physician/Osteopath | Adolescent Medicine: Family Practice                      |
| V118303 | Physician/Osteopath | Aerospace Medicine                                        |
| V118304 | Physician/Osteopath | Allergy & Immunology: Internal Medicine                   |
| V118305 | Physician/Osteopath | Adolescent Only, Under 16                                 |
| V118306 | Physician/Osteopath | Adolescent Only, Under 21                                 |
| V118307 | Physician/Osteopath | Age Specific, Greater than 1 Year Old                     |
| V118308 | Physician/Osteopath | Age Specific, Newborns Only                               |
| V118309 | Physician/Osteopath | Blood Banking                                             |
| V118310 | Physician/Osteopath | Cardiac Electrophysiology, Clinical                       |
| V118311 | Physician/Osteopath | Critical Care Medicine                                    |
| V118312 | Physician/Osteopath | Diabetes                                                  |
| V118313 | Physician/Osteopath | Endocrinology                                             |
| V118314 | Physician/Osteopath | Geriatric Medicine                                        |
| V118315 | Physician/Osteopath | Gynecology                                                |
| V118316 | Physician/Osteopath | Hematology                                                |
| V118317 | Physician/Osteopath | Immunology, Clinical & Laboratory                         |
| V118318 | Physician/Osteopath | Immunology, Dermatological                                |
| V118319 | Physician/Osteopath | Immunology: Laboratory, Diagnostic                        |
| V118320 | Physician/Osteopath | Infertility                                               |
| V118321 | Physician/Osteopath | Neonatology                                               |
| V118322 | Physician/Osteopath | Public Health: Preventive Medicine                        |
| V118323 | Physician/Osteopath | Pharmacotherapy                                           |
| V118324 | Physician/Osteopath | Psychopharmacy                                            |

|         |                                      |                                                |
|---------|--------------------------------------|------------------------------------------------|
| V118325 | Physician/Osteopath                  | Pain Medicine                                  |
| V118326 | Physician/Osteopath                  | Radiology, Angiography & Interventional        |
| V118327 | Physician/Osteopath                  | Radiology, Therapeutic                         |
| V118328 | Physician/Osteopath                  | Radium Therapy                                 |
| V118329 | Physician/Osteopath                  | Rhinology                                      |
| V118330 | Physician/Osteopath                  | Roentgenology                                  |
| V118331 | Physician/Osteopath                  | Roentgenology, Diagnostic                      |
| V118332 | Physician/Osteopath                  | Sports Medicine                                |
| V118333 | Physician/Osteopath                  | Surgery, Abdominal                             |
| V118334 | Physician/Osteopath                  | Surgery, Facial Plastic                        |
| V118335 | Physician/Osteopath                  | Toxicology, Medical                            |
| V118336 | Physician/Osteopath                  | Thermography                                   |
| V118337 | Physician/Osteopath                  | Occupational Medicine                          |
| V118338 | Physician/Osteopath                  | Oncology                                       |
| V118339 | Physician/Osteopath                  | Otorhinolaryngology & Head-Neck                |
| V118340 | Physician/Osteopath                  | Orthopedic                                     |
| V118341 | Physician/Osteopath                  | Orthopedic Surgery: Foot and Ankle Orthopedics |
| V118342 | Physician/Osteopath                  | Orthopedic Surgery: Sports Medicine            |
| V118343 | Physician/Osteopath                  | Sports Medicine - OMM                          |
| V160100 | Physician/Osteopath (Other Roles)    | NULL                                           |
| V160101 | Physician/Osteopath                  | Laboratory Service Provider                    |
| V160102 | Physician/Osteopath                  | Supplier                                       |
| V170500 | Nursing Home Administrator           | NULL                                           |
| V170900 | Day Training/Habilitation Specialist | NULL                                           |
| V180300 | Clinical Pharmacology                | NULL                                           |
| V180600 | Emergency Medicine                   | NULL                                           |
| V180601 | Emergency Medicine                   | Emergency Medical Services                     |
| V180602 | Emergency Medicine                   | Medical Toxicology                             |
| V180603 | Emergency Medicine                   | Pediatric Emergency Medicine                   |
| V180604 | Emergency Medicine                   | Sports Medicine                                |
| V180605 | Emergency Medicine                   | Undersea and Hyperbaric Medicine               |
| V180700 | Family Medicine                      | NULL                                           |
| V180702 | Family Medicine                      | Adolescent Medicine                            |
| V180703 | Family Medicine                      | Adult Medicine                                 |
| V180704 | Family Medicine                      | Geriatric Medicine                             |
| V180705 | Family Medicine                      | Sports Medicine                                |
| V180707 | Family Medicine                      | Sleep Medicine                                 |
| V180800 | General Practice                     | NULL                                           |

|         |                            |                                         |
|---------|----------------------------|-----------------------------------------|
| V181000 | Internal Medicine          | NULL                                    |
| V181002 | Internal Medicine          | Adolescent Medicine                     |
| V181003 | Internal Medicine          | Allergy & Immunology                    |
| V181004 | Internal Medicine          | Cardiovascular Disease                  |
| V181005 | Internal Medicine          | Clinical & Laboratory Immunology        |
| V181006 | Internal Medicine          | Clinical Cardiac Electrophysiology      |
| V181007 | Internal Medicine          | Critical Care Medicine                  |
| V181008 | Internal Medicine          | Endocrinology, Diabetes & Metabolism    |
| V181009 | Internal Medicine          | Gastroenterology                        |
| V181010 | Internal Medicine          | Geriatric Medicine                      |
| V181011 | Internal Medicine          | Hematology                              |
| V181012 | Internal Medicine          | Hematology & Oncology                   |
| V181013 | Internal Medicine          | Hepatology                              |
| V181014 | Internal Medicine          | Infectious Disease                      |
| V181015 | Internal Medicine          | Interventional Cardiology               |
| V181016 | Internal Medicine          | Magnetic Resonance Imaging (MRI)        |
| V181017 | Internal Medicine          | Medical Oncology                        |
| V181018 | Internal Medicine          | Nephrology                              |
| V181019 | Internal Medicine          | Pulmonary Disease                       |
| V181020 | Internal Medicine          | Rheumatology                            |
| V181021 | Internal Medicine          | Sports Medicine                         |
| V181100 | Legal Medicine             | NULL                                    |
| V181550 | Electrodiagnostic Medicine | NULL                                    |
| V182301 | Pain Medicine              | Interventional Pain Medicine            |
| V182302 | Pain Medicine              | Pain Medicine                           |
| V182401 | Pathology                  | Anatomic Pathology                      |
| V182402 | Pathology                  | Anatomic Pathology & Clinical Pathology |
| V182403 | Pathology                  | Blood Banking & Transfusion Medicine    |
| V182404 | Pathology                  | Chemical Pathology                      |
| V182405 | Pathology                  | Clinical Pathology/Laboratory Medicine  |
| V182406 | Pathology                  | Cytopathology                           |
| V182407 | Pathology                  | Dermatopathology                        |
| V182408 | Pathology                  | Forensic Pathology                      |
| V182409 | Pathology                  | Hematology                              |
| V182410 | Pathology                  | Immunopathology                         |
| V182411 | Pathology                  | Medical Microbiology                    |
| V182412 | Pathology                  | Molecular Genetic Pathology             |
| V182413 | Pathology                  | Neuropathology                          |
| V182414 | Pathology                  | Pediatric Pathology                     |

|         |                                    |                                                          |
|---------|------------------------------------|----------------------------------------------------------|
| V182600 | Physical Medicine & Rehabilitation | NULL                                                     |
| V182601 | Physical Medicine & Rehabilitation | Pain Medicine                                            |
| V182602 | Physical Medicine & Rehabilitation | Pediatric Rehabilitation Medicine                        |
| V182603 | Physical Medicine & Rehabilitation | Spinal Cord Injury Medicine                              |
| V182604 | Physical Medicine & Rehabilitation | Sports Medicine                                          |
| V182605 | Internal Medicine                  | Hypertension Specialist                                  |
| V182605 | Physical Medicine & Rehabilitation | Hospice and Palliative Medicine                          |
| V182605 | Physical Medicine & Rehabilitation | Neuromuscular Medicine                                   |
| V182801 | Preventive Medicine                | Aerospace Medicine                                       |
| V182802 | Preventive Medicine                | Medical Toxicology                                       |
| V182803 | Preventive Medicine                | Occupational Medicine                                    |
| V182804 | Preventive Medicine                | Preventive Medicine/Occupational Environmental Medicine  |
| V182805 | Preventive Medicine                | Public Health & General Preventive Medicine              |
| V182806 | Preventive Medicine                | Sports Medicine                                          |
| V182807 | Preventive Medicine                | Undersea and Hyperbaric Medicine                         |
| V182904 | Psychiatry & Neurology             | Clinical Neurophysiology                                 |
| V182907 | Psychiatry & Neurology             | Neurodevelopmental Disabilities                          |
| V182908 | Psychiatry & Neurology             | Neurology                                                |
| V182909 | Psychiatry & Neurology             | Neurology with Special Qualifications in Child Neurology |
| V182910 | Psychiatry & Neurology             | Pain Medicine                                            |
| V182912 | Psychiatry & Neurology             | Sports Medicine                                          |
| V182913 | Psychiatry & Neurology             | Vascular Neurology                                       |
| V183001 | Radiology                          | Body Imaging                                             |
| V183001 | Radiology                          | Diagnostic Radiology                                     |
| V183002 | Radiology                          | Diagnostic Radiology                                     |
| V183003 | Radiology                          | Diagnostic Ultrasound                                    |
| V183004 | Radiology                          | Diagnostic Radiology                                     |
| V183004 | Radiology                          | Neuroradiology                                           |
| V183005 | Radiology                          | Nuclear Radiology                                        |
| V183006 | Radiology                          | Pediatric Radiology                                      |
| V183007 | Radiology                          | Radiation Oncology                                       |
| V183008 | Radiology                          | Radiological Physics                                     |
| V183009 | Radiology                          | Radiation Oncology                                       |
| V183009 | Radiology                          | Therapeutic Radiology                                    |

|         |                                                    |                                                   |
|---------|----------------------------------------------------|---------------------------------------------------|
| V183010 | Radiology                                          | Vascular & Interventional Radiology               |
| V183011 | Radiology                                          | Diagnostic Neuroimaging                           |
| V183012 | Radiology                                          | Hospice and Palliative Medicine                   |
| V183100 | Surgery                                            | NULL                                              |
| V183101 | Surgery                                            | Pediatric Surgery                                 |
| V183102 | Surgery                                            | Plastic and Reconstructive Surgery                |
| V183103 | Surgery                                            | Surgery of the Hand                               |
| V183104 | Surgery                                            | Surgical Critical Care                            |
| V183105 | Surgery                                            | Surgical Oncology                                 |
| V183106 | Surgery                                            | Trauma Surgery                                    |
| V183107 | Surgery                                            | Vascular Surgery                                  |
| V183108 | Surgery                                            | Hospice and Palliative Medicine                   |
| V183200 | Thoracic Surgery (Cardiothoracic Vascular Surgery) | NULL                                              |
| V183300 | Transplant Surgery                                 | NULL                                              |
| V183400 | Urology                                            | NULL                                              |
| V183401 | Urology                                            | Female Pelvic Medicine and Reconstructive Surgery |
| V183402 | Urology                                            | Pediatric Urology                                 |

*eTable 7: ICD-10 codes for identifying mental health conditions, used as part of the criteria for identifying psychotherapy and medication management visits*

| ICD-10 Diagnosis Codes for Mental Health Conditions |                                                                                       |            |      |     |     |
|-----------------------------------------------------|---------------------------------------------------------------------------------------|------------|------|-----|-----|
| ICD10Code                                           | ICD10Description                                                                      | Depression | PTSD | SMI | SUD |
| F06.31                                              | Mood disorder due to known physiological condition with depressive features           | X          |      |     |     |
| F06.32                                              | Mood disorder due to known physiological condition with major depressive-like episode | X          |      |     |     |
| F32.                                                | Major depressive disorder, single episode                                             | X          |      |     |     |
| F32.0                                               | Major depressive disorder, single episode, mild                                       | X          |      |     |     |
| F32.1                                               | Major depressive disorder, single episode, moderate                                   | X          |      |     |     |
| F32.2                                               | Major depressive disorder, single episode, severe without psychotic features          | X          |      |     |     |
| F32.3                                               | Major depressive disorder, single episode, severe with psychotic features             | X          |      |     |     |
| F32.4                                               | Major depressive disorder, single episode, in partial remission                       | X          |      |     |     |
| F32.5                                               | Major depressive disorder, single episode, in full remission                          | X          |      |     |     |
| F32.8                                               | Other Depressive Episodes                                                             | X          |      |     |     |
| F32.81                                              | Premenstrual dysphoric disorder                                                       | X          |      |     |     |

|        |                                                                             |   |   |   |  |
|--------|-----------------------------------------------------------------------------|---|---|---|--|
| F32.89 | Other specified depressive episodes                                         | X |   |   |  |
| F32.9  | Major depressive disorder, single episode, unspecified                      | X |   |   |  |
| F33.   | Major depressive disorder, recurrent                                        | X |   |   |  |
| F33.0  | Major depressive disorder, recurrent, mild                                  | X |   |   |  |
| F33.1  | Major depressive disorder, recurrent, moderate                              | X |   |   |  |
| F33.2  | Major depressive disorder, recurrent severe without psychotic features      | X |   |   |  |
| F33.3  | Major depressive disorder, recurrent, severe with psychotic symptoms        | X |   |   |  |
| F33.4  | Major depressive disorder, recurrent, in remission                          | X |   |   |  |
| F33.40 | Major depressive disorder, recurrent, in remission, unspecified             | X |   |   |  |
| F33.41 | Major depressive disorder, recurrent, in partial remission                  | X |   |   |  |
| F33.42 | Major depressive disorder, recurrent, in full remission                     | X |   |   |  |
| F33.8  | Other recurrent depressive disorders                                        | X |   |   |  |
| F33.9  | Major depressive disorder, recurrent, unspecified                           | X |   |   |  |
| F34.1  | Dysthymic disorder                                                          | X |   |   |  |
| F43.1  | Post-traumatic stress disorder (PTSD)                                       |   | X |   |  |
| F43.10 | Post-traumatic stress disorder, unspecified                                 |   | X |   |  |
| F43.11 | Post-traumatic stress disorder, acute                                       |   | X |   |  |
| F43.12 | Post-traumatic stress disorder, chronic                                     |   | X |   |  |
| F06.0  | Psychotic disorder with hallucinations due to known physiological condition |   |   | X |  |
| F06.2  | Psychotic disorder with delusions due to known physiological condition      |   |   | X |  |
| F20.   | Schizophrenia                                                               |   |   | X |  |
| F20.0  | Paranoid schizophrenia                                                      |   |   | X |  |
| F20.1  | Disorganized schizophrenia                                                  |   |   | X |  |
| F20.2  | Catatonic schizophrenia                                                     |   |   | X |  |
| F20.3  | Undifferentiated schizophrenia                                              |   |   | X |  |
| F20.5  | Residual schizophrenia                                                      |   |   | X |  |
| F20.8  | Other schizophrenia                                                         |   |   | X |  |
| F20.81 | Schizophreniform disorder                                                   |   |   | X |  |
| F20.89 | Other schizophrenia                                                         |   |   | X |  |
| F20.9  | Schizophrenia, unspecified                                                  |   |   | X |  |
| F22.   | Delusional disorders                                                        |   |   | X |  |
| F23.   | Brief psychotic disorder                                                    |   |   | X |  |
| F24.   | Shared psychotic disorder                                                   |   |   | X |  |
| F25.   | Schizoaffective disorders                                                   |   |   | X |  |

|        |                                                                                     |  |  |   |  |
|--------|-------------------------------------------------------------------------------------|--|--|---|--|
| F25.0  | Schizoaffective disorder, bipolar type                                              |  |  | X |  |
| F25.1  | Schizoaffective disorder, depressive type                                           |  |  | X |  |
| F25.8  | Other schizoaffective disorders                                                     |  |  | X |  |
| F25.9  | Schizoaffective disorder, unspecified                                               |  |  | X |  |
| F28.   | Other psychotic disorder not due to a substance or known physiological condition    |  |  | X |  |
| F29.   | Unspecified psychosis not due to a substance or known physiological condition       |  |  | X |  |
| F30.   | Manic episode                                                                       |  |  | X |  |
| F30.1  | Manic episode without psychotic symptoms                                            |  |  | X |  |
| F30.10 | Manic episode without psychotic symptoms, unspecified                               |  |  | X |  |
| F30.11 | Manic episode without psychotic symptoms, mild                                      |  |  | X |  |
| F30.12 | Manic episode without psychotic symptoms, moderate                                  |  |  | X |  |
| F30.13 | Manic episode, severe, without psychotic symptoms                                   |  |  | X |  |
| F30.2  | Manic episode, severe with psychotic symptoms                                       |  |  | X |  |
| F30.3  | Manic episode in partial remission                                                  |  |  | X |  |
| F30.4  | Manic episode in full remission                                                     |  |  | X |  |
| F30.8  | Other manic episodes                                                                |  |  | X |  |
| F30.9  | Manic episode, unspecified                                                          |  |  | X |  |
| F31.   | Bipolar disorder                                                                    |  |  | X |  |
| F31.0  | Bipolar disorder, current episode hypomanic                                         |  |  | X |  |
| F31.1  | Bipolar disorder, current episode manic without psychotic features                  |  |  | X |  |
| F31.10 | Bipolar disorder, current episode manic without psychotic features, unspecified     |  |  | X |  |
| F31.11 | Bipolar disorder, current episode manic without psychotic features, mild            |  |  | X |  |
| F31.12 | Bipolar disorder, current episode manic without psychotic features, moderate        |  |  | X |  |
| F31.13 | Bipolar disorder, current episode manic without psychotic features, severe          |  |  | X |  |
| F31.2  | Bipolar disorder, current episode manic severe with psychotic features              |  |  | X |  |
| F31.3  | Bipolar disorder, current episode depressed, mild or moderate severity              |  |  | X |  |
| F31.30 | Bipolar disorder, current episode depressed, mild or moderate severity, unspecified |  |  | X |  |
| F31.31 | Bipolar disorder, current episode depressed, mild                                   |  |  | X |  |
| F31.32 | Bipolar disorder, current episode depressed, moderate                               |  |  | X |  |

|        |                                                                                          |  |  |   |   |
|--------|------------------------------------------------------------------------------------------|--|--|---|---|
| F31.4  | Bipolar disorder, current episode depressed, severe, without psychotic features          |  |  | X |   |
| F31.5  | Bipolar disorder, current episode depressed, severe, with psychotic features             |  |  | X |   |
| F31.6  | Bipolar disorder, current episode mixed                                                  |  |  | X |   |
| F31.60 | Bipolar disorder, current episode mixed, unspecified                                     |  |  | X |   |
| F31.61 | Bipolar disorder, current episode mixed, mild                                            |  |  | X |   |
| F31.62 | Bipolar disorder, current episode mixed, moderate                                        |  |  | X |   |
| F31.63 | Bipolar disorder, current episode mixed, severe, without psychotic features              |  |  | X |   |
| F31.64 | Bipolar disorder, current episode mixed, severe, with psychotic features                 |  |  | X |   |
| F31.7  | Bipolar disorder, currently in remission                                                 |  |  | X |   |
| F31.70 | Bipolar disorder, currently in remission, most recent episode unspecified                |  |  | X |   |
| F31.71 | Bipolar disorder, in partial remission, most recent episode hypomanic                    |  |  | X |   |
| F31.72 | Bipolar disorder, in full remission, most recent episode hypomanic                       |  |  | X |   |
| F31.73 | Bipolar disorder, in partial remission, most recent episode manic                        |  |  | X |   |
| F31.74 | Bipolar disorder, in full remission, most recent episode manic                           |  |  | X |   |
| F31.75 | Bipolar disorder, in partial remission, most recent episode depressed                    |  |  | X |   |
| F31.76 | Bipolar disorder, in full remission, most recent episode depressed                       |  |  | X |   |
| F31.77 | Bipolar disorder, in partial remission, most recent episode mixed                        |  |  | X |   |
| F31.78 | Bipolar disorder, in full remission, most recent episode mixed                           |  |  | X |   |
| F31.8  | Other bipolar disorders                                                                  |  |  | X |   |
| F31.81 | Bipolar II disorder                                                                      |  |  | X |   |
| F31.89 | Other bipolar disorder                                                                   |  |  | X |   |
| F31.9  | Bipolar disorder, unspecified                                                            |  |  | X |   |
| F53.   | Mental and behavioral disorders associated with the puerperium, not elsewhere classified |  |  | X |   |
| F53.1  | Puerperal psychosis                                                                      |  |  | X |   |
| F10.   | Alcohol related disorders                                                                |  |  |   | X |
| F10.1  | Alcohol abuse                                                                            |  |  |   | X |
| F10.10 | Alcohol abuse, uncomplicated                                                             |  |  |   | X |
| F10.11 | Alcohol abuse, in remission                                                              |  |  |   | X |
| F10.12 | Alcohol abuse with intoxication                                                          |  |  |   | X |



|         |                                                                           |  |  |  |   |
|---------|---------------------------------------------------------------------------|--|--|--|---|
| F10.120 | Alcohol abuse with intoxication, uncomplicated                            |  |  |  | X |
| F10.121 | Alcohol abuse with intoxication delirium                                  |  |  |  | X |
| F10.129 | Alcohol abuse with intoxication, unspecified                              |  |  |  | X |
| F10.13  | Alcohol abuse, with withdrawal                                            |  |  |  | X |
| F10.130 | Alcohol abuse with withdrawal, uncomplicated                              |  |  |  | X |
| F10.131 | Alcohol abuse with withdrawal delirium                                    |  |  |  | X |
| F10.132 | Alcohol abuse with withdrawal with perceptual disturbance                 |  |  |  | X |
| F10.139 | Alcohol abuse with withdrawal, unspecified                                |  |  |  | X |
| F10.14  | Alcohol abuse with alcohol-induced mood disorder                          |  |  |  | X |
| F10.15  | Alcohol abuse with alcohol-induced psychotic disorder                     |  |  |  | X |
| F10.150 | Alcohol abuse with alcohol-induced psychotic disorder with delusions      |  |  |  | X |
| F10.151 | Alcohol abuse with alcohol-induced psychotic disorder with hallucinations |  |  |  | X |
| F10.159 | Alcohol abuse with alcohol-induced psychotic disorder, unspecified        |  |  |  | X |
| F10.18  | Alcohol abuse with other alcohol-induced disorders                        |  |  |  | X |
| F10.180 | Alcohol abuse with alcohol-induced anxiety disorder                       |  |  |  | X |
| F10.181 | Alcohol abuse with alcohol-induced sexual dysfunction                     |  |  |  | X |
| F10.182 | Alcohol abuse with alcohol-induced sleep disorder                         |  |  |  | X |
| F10.188 | Alcohol abuse with other alcohol-induced disorder                         |  |  |  | X |
| F10.19  | Alcohol abuse with unspecified alcohol-induced disorder                   |  |  |  | X |
| F10.2   | Alcohol dependence                                                        |  |  |  | X |
| F10.20  | Alcohol dependence, uncomplicated                                         |  |  |  | X |
| F10.21  | Alcohol dependence, in remission                                          |  |  |  | X |
| F10.22  | Alcohol dependence with intoxication                                      |  |  |  | X |
| F10.220 | Alcohol dependence with intoxication, uncomplicated                       |  |  |  | X |
| F10.221 | Alcohol dependence with intoxication delirium                             |  |  |  | X |
| F10.229 | Alcohol dependence with intoxication, unspecified                         |  |  |  | X |
| F10.23  | Alcohol dependence with withdrawal                                        |  |  |  | X |
| F10.230 | Alcohol dependence with withdrawal, uncomplicated                         |  |  |  | X |
| F10.231 | Alcohol dependence with withdrawal delirium                               |  |  |  | X |

|         |                                                                                |  |  |  |   |
|---------|--------------------------------------------------------------------------------|--|--|--|---|
| F10.232 | Alcohol dependence with withdrawal with perceptual disturbance                 |  |  |  | X |
| F10.239 | Alcohol dependence with withdrawal, unspecified                                |  |  |  | X |
| F10.24  | Alcohol dependence with alcohol-induced mood disorder                          |  |  |  | X |
| F10.25  | Alcohol dependence with alcohol-induced psychotic disorder                     |  |  |  | X |
| F10.250 | Alcohol dependence with alcohol-induced psychotic disorder with delusions      |  |  |  | X |
| F10.251 | Alcohol dependence with alcohol-induced psychotic disorder with hallucinations |  |  |  | X |
| F10.259 | Alcohol dependence with alcohol-induced psychotic disorder, unspecified        |  |  |  | X |
| F10.26  | Alcohol dependence with alcohol-induced persisting amnestic disorder           |  |  |  | X |
| F10.27  | Alcohol dependence with alcohol-induced persisting dementia                    |  |  |  | X |
| F10.28  | Alcohol dependence with other alcohol-induced disorders                        |  |  |  | X |
| F10.280 | Alcohol dependence with alcohol-induced anxiety disorder                       |  |  |  | X |
| F10.281 | Alcohol dependence with alcohol-induced sexual dysfunction                     |  |  |  | X |
| F10.282 | Alcohol dependence with alcohol-induced sleep disorder                         |  |  |  | X |
| F10.288 | Alcohol dependence with other alcohol-induced disorder                         |  |  |  | X |
| F10.29  | Alcohol dependence with unspecified alcohol-induced disorder                   |  |  |  | X |
| F10.9   | Alcohol use, unspecified                                                       |  |  |  | X |
| F10.92  | Alcohol use, unspecified with intoxication                                     |  |  |  | X |
| F10.920 | Alcohol use, unspecified with intoxication, uncomplicated                      |  |  |  | X |
| F10.921 | Alcohol use, unspecified with intoxication delirium                            |  |  |  | X |
| F10.929 | Alcohol use, unspecified with intoxication, unspecified                        |  |  |  | X |
| F10.93  | Alcohol use, unspecified with withdrawal                                       |  |  |  | X |
| F10.930 | Alcohol use, unspecified with withdrawal, uncomplicated                        |  |  |  | X |
| F10.931 | Alcohol use, unspecified with withdrawal delirium                              |  |  |  | X |
| F10.932 | Alcohol use, unspecified with withdrawal with perceptual disturbance           |  |  |  | X |
| F10.939 | Alcohol use, unspecified with withdrawal, unspecified                          |  |  |  | X |

|         |                                                                                      |  |  |  |   |
|---------|--------------------------------------------------------------------------------------|--|--|--|---|
| F10.94  | Alcohol use, unspecified with alcohol-induced mood disorder                          |  |  |  | X |
| F10.95  | Alcohol use, unspecified with alcohol-induced psychotic disorder                     |  |  |  | X |
| F10.950 | Alcohol use, unspecified with alcohol-induced psychotic disorder with delusions      |  |  |  | X |
| F10.951 | Alcohol use, unspecified with alcohol-induced psychotic disorder with hallucinations |  |  |  | X |
| F10.959 | Alcohol use, unspecified with alcohol-induced psychotic disorder, unspecified        |  |  |  | X |
| F10.96  | Alcohol use, unspecified with alcohol-induced persisting amnestic disorder           |  |  |  | X |
| F10.97  | Alcohol use, unspecified with alcohol-induced persisting dementia                    |  |  |  | X |
| F10.98  | Alcohol use, unspecified with other alcohol-induced disorders                        |  |  |  | X |
| F10.980 | Alcohol use, unspecified with alcohol-induced anxiety disorder                       |  |  |  | X |
| F10.981 | Alcohol use, unspecified with alcohol-induced sexual dysfunction                     |  |  |  | X |
| F10.982 | Alcohol use, unspecified with alcohol-induced sleep disorder                         |  |  |  | X |
| F10.988 | Alcohol use, unspecified with other alcohol-induced disorder                         |  |  |  | X |
| F10.99  | Alcohol use, unspecified with unspecified alcohol-induced disorder                   |  |  |  | X |
| F11.    | Opioid related disorders                                                             |  |  |  | X |
| F11.1   | Opioid abuse                                                                         |  |  |  | X |
| F11.10  | Opioid abuse, uncomplicated                                                          |  |  |  | X |
| F11.11  | Opioid abuse, in remission                                                           |  |  |  | X |
| F11.12  | Opioid abuse with intoxication                                                       |  |  |  | X |
| F11.120 | Opioid abuse with intoxication, uncomplicated                                        |  |  |  | X |
| F11.121 | Opioid abuse with intoxication delirium                                              |  |  |  | X |
| F11.122 | Opioid abuse with intoxication with perceptual disturbance                           |  |  |  | X |
| F11.129 | Opioid abuse with intoxication, unspecified                                          |  |  |  | X |
| F11.13  | Opioid abuse with withdrawal                                                         |  |  |  | X |
| F11.14  | Opioid abuse with opioid-induced mood disorder                                       |  |  |  | X |
| F11.15  | Opioid abuse with opioid-induced psychotic disorder                                  |  |  |  | X |
| F11.150 | Opioid abuse with opioid-induced psychotic disorder with delusions                   |  |  |  | X |
| F11.151 | Opioid abuse with opioid-induced psychotic disorder with hallucinations              |  |  |  | X |

|         |                                                                              |  |  |  |   |
|---------|------------------------------------------------------------------------------|--|--|--|---|
| F11.159 | Opioid abuse with opioid-induced psychotic disorder, unspecified             |  |  |  | X |
| F11.18  | Opioid abuse with other opioid-induced disorder                              |  |  |  | X |
| F11.181 | Opioid abuse with opioid-induced sexual dysfunction                          |  |  |  | X |
| F11.182 | Opioid abuse with opioid-induced sleep disorder                              |  |  |  | X |
| F11.188 | Opioid abuse with other opioid-induced disorder                              |  |  |  | X |
| F11.19  | Opioid abuse with unspecified opioid-induced disorder                        |  |  |  | X |
| F11.2   | Opioid dependence                                                            |  |  |  | X |
| F11.20  | Opioid dependence, uncomplicated                                             |  |  |  | X |
| F11.21  | Opioid dependence, in remission                                              |  |  |  | X |
| F11.22  | Opioid dependence with intoxication                                          |  |  |  | X |
| F11.220 | Opioid dependence with intoxication, uncomplicated                           |  |  |  | X |
| F11.221 | Opioid dependence with intoxication delirium                                 |  |  |  | X |
| F11.222 | Opioid dependence with intoxication with perceptual disturbance              |  |  |  | X |
| F11.229 | Opioid dependence with intoxication, unspecified                             |  |  |  | X |
| F11.23  | Opioid dependence with withdrawal                                            |  |  |  | X |
| F11.24  | Opioid dependence with opioid-induced mood disorder                          |  |  |  | X |
| F11.25  | Opioid dependence with opioid-induced psychotic disorder                     |  |  |  | X |
| F11.250 | Opioid dependence with opioid-induced psychotic disorder with delusions      |  |  |  | X |
| F11.251 | Opioid dependence with opioid-induced psychotic disorder with hallucinations |  |  |  | X |
| F11.259 | Opioid dependence with opioid-induced psychotic disorder, unspecified        |  |  |  | X |
| F11.28  | Opioid dependence with other opioid-induced disorder                         |  |  |  | X |
| F11.281 | Opioid dependence with opioid-induced sexual dysfunction                     |  |  |  | X |
| F11.282 | Opioid dependence with opioid-induced sleep disorder                         |  |  |  | X |
| F11.288 | Opioid dependence with other opioid-induced disorder                         |  |  |  | X |
| F11.29  | Opioid dependence with unspecified opioid-induced disorder                   |  |  |  | X |
| F11.9   | Opioid use, unspecified                                                      |  |  |  | X |
| F11.90  | Opioid use, unspecified, uncomplicated                                       |  |  |  | X |

|         |                                                                                    |  |  |  |   |
|---------|------------------------------------------------------------------------------------|--|--|--|---|
| F11.92  | Opioid use, unspecified with intoxication                                          |  |  |  | X |
| F11.920 | Opioid use, unspecified with intoxication, uncomplicated                           |  |  |  | X |
| F11.921 | Opioid use, unspecified with intoxication delirium                                 |  |  |  | X |
| F11.922 | Opioid use, unspecified with intoxication with perceptual disturbance              |  |  |  | X |
| F11.929 | Opioid use, unspecified with intoxication, unspecified                             |  |  |  | X |
| F11.93  | Opioid use, unspecified with withdrawal                                            |  |  |  | X |
| F11.94  | Opioid use, unspecified with opioid-induced mood disorder                          |  |  |  | X |
| F11.95  | Opioid use, unspecified with opioid-induced psychotic disorder                     |  |  |  | X |
| F11.950 | Opioid use, unspecified with opioid-induced psychotic disorder with delusions      |  |  |  | X |
| F11.951 | Opioid use, unspecified with opioid-induced psychotic disorder with hallucinations |  |  |  | X |
| F11.959 | Opioid use, unspecified with opioid-induced psychotic disorder, unspecified        |  |  |  | X |
| F11.98  | Opioid use, unspecified with other specified opioid-induced disorder               |  |  |  | X |
| F11.981 | Opioid use, unspecified with opioid-induced sexual dysfunction                     |  |  |  | X |
| F11.982 | Opioid use, unspecified with opioid-induced sleep disorder                         |  |  |  | X |
| F11.988 | Opioid use, unspecified with other opioid-induced disorder                         |  |  |  | X |
| F11.99  | Opioid use, unspecified with unspecified opioid-induced disorder                   |  |  |  | X |
| F12.    | Cannabis related disorders                                                         |  |  |  | X |
| F12.1   | Cannabis abuse                                                                     |  |  |  | X |
| F12.10  | Cannabis abuse, uncomplicated                                                      |  |  |  | X |
| F12.11  | Cannabis abuse, in remission                                                       |  |  |  | X |
| F12.12  | Cannabis abuse with intoxication                                                   |  |  |  | X |
| F12.120 | Cannabis abuse with intoxication, uncomplicated                                    |  |  |  | X |
| F12.121 | Cannabis abuse with intoxication delirium                                          |  |  |  | X |
| F12.122 | Cannabis abuse with intoxication with perceptual disturbance                       |  |  |  | X |
| F12.129 | Cannabis abuse with intoxication, unspecified                                      |  |  |  | X |
| F12.13  | Cannabis abuse with withdrawal                                                     |  |  |  | X |
| F12.15  | Cannabis abuse with psychotic disorder                                             |  |  |  | X |
| F12.150 | Cannabis abuse with psychotic disorder with delusions                              |  |  |  | X |

|         |                                                                   |  |  |  |   |
|---------|-------------------------------------------------------------------|--|--|--|---|
| F12.151 | Cannabis abuse with psychotic disorder with hallucinations        |  |  |  | X |
| F12.159 | Cannabis abuse with psychotic disorder, unspecified               |  |  |  | X |
| F12.18  | Cannabis abuse with other cannabis-induced disorder               |  |  |  | X |
| F12.180 | Cannabis abuse with cannabis-induced anxiety disorder             |  |  |  | X |
| F12.188 | Cannabis abuse with other cannabis-induced disorder               |  |  |  | X |
| F12.19  | Cannabis abuse with unspecified cannabis-induced disorder         |  |  |  | X |
| F12.2   | Cannabis dependence                                               |  |  |  | X |
| F12.20  | Cannabis dependence, uncomplicated                                |  |  |  | X |
| F12.21  | Cannabis dependence, in remission                                 |  |  |  | X |
| F12.22  | Cannabis dependence with intoxication                             |  |  |  | X |
| F12.220 | Cannabis dependence with intoxication, uncomplicated              |  |  |  | X |
| F12.221 | Cannabis dependence with intoxication delirium                    |  |  |  | X |
| F12.222 | Cannabis dependence with intoxication with perceptual disturbance |  |  |  | X |
| F12.229 | Cannabis dependence with intoxication, unspecified                |  |  |  | X |
| F12.23  | Cannabis dependence with withdrawal                               |  |  |  | X |
| F12.25  | Cannabis dependence with psychotic disorder                       |  |  |  | X |
| F12.250 | Cannabis dependence with psychotic disorder with delusions        |  |  |  | X |
| F12.251 | Cannabis dependence with psychotic disorder with hallucinations   |  |  |  | X |
| F12.259 | Cannabis dependence with psychotic disorder, unspecified          |  |  |  | X |
| F12.28  | Cannabis dependence with other cannabis-induced disorder          |  |  |  | X |
| F12.280 | Cannabis dependence with cannabis-induced anxiety disorder        |  |  |  | X |
| F12.288 | Cannabis dependence with other cannabis-induced disorder          |  |  |  | X |
| F12.29  | Cannabis dependence with unspecified cannabis-induced disorder    |  |  |  | X |
| F12.9   | Cannabis use, unspecified                                         |  |  |  | X |
| F12.90  | Cannabis use, unspecified, uncomplicated                          |  |  |  | X |
| F12.92  | Cannabis use, unspecified with intoxication                       |  |  |  | X |
| F12.920 | Cannabis use, unspecified with intoxication, uncomplicated        |  |  |  | X |

|         |                                                                                    |  |  |  |   |
|---------|------------------------------------------------------------------------------------|--|--|--|---|
| F12.921 | Cannabis use, unspecified with intoxication delirium                               |  |  |  | X |
| F12.922 | Cannabis use, unspecified with intoxication with perceptual disturbance            |  |  |  | X |
| F12.929 | Cannabis use, unspecified with intoxication, unspecified                           |  |  |  | X |
| F12.93  | Cannabis use, unspecified with withdrawal                                          |  |  |  | X |
| F12.95  | Cannabis use, unspecified with psychotic disorder                                  |  |  |  | X |
| F12.950 | Cannabis use, unspecified with psychotic disorder with delusions                   |  |  |  | X |
| F12.951 | Cannabis use, unspecified with psychotic disorder with hallucinations              |  |  |  | X |
| F12.959 | Cannabis use, unspecified with psychotic disorder, unspecified                     |  |  |  | X |
| F12.98  | Cannabis use, unspecified with other cannabis-induced disorder                     |  |  |  | X |
| F12.980 | Cannabis use, unspecified with anxiety disorder                                    |  |  |  | X |
| F12.988 | Cannabis use, unspecified with other cannabis-induced disorder                     |  |  |  | X |
| F12.99  | Cannabis use, unspecified with unspecified cannabis-induced disorder               |  |  |  | X |
| F13.    | Sedative, hypnotic, or anxiolytic related disorders                                |  |  |  | X |
| F13.1   | Sedative, hypnotic or anxiolytic-related abuse                                     |  |  |  | X |
| F13.10  | Sedative, hypnotic or anxiolytic abuse, uncomplicated                              |  |  |  | X |
| F13.11  | Sedative, hypnotic or anxiolytic abuse, in remission                               |  |  |  | X |
| F13.12  | Sedative, hypnotic or anxiolytic abuse with intoxication                           |  |  |  | X |
| F13.120 | Sedative, hypnotic or anxiolytic abuse with intoxication, uncomplicated            |  |  |  | X |
| F13.121 | Sedative, hypnotic or anxiolytic abuse with intoxication delirium                  |  |  |  | X |
| F13.129 | Sedative, hypnotic or anxiolytic abuse with intoxication, unspecified              |  |  |  | X |
| F13.13  | Sedative, hypnotic or anxiolytic abuse with withdrawal                             |  |  |  | X |
| F13.130 | Sedative, hypnotic or anxiolytic abuse with withdrawal, uncomplicated              |  |  |  | X |
| F13.131 | Sedative, hypnotic or anxiolytic abuse with withdrawal delirium                    |  |  |  | X |
| F13.132 | Sedative, hypnotic or anxiolytic abuse with withdrawal with perceptual disturbance |  |  |  | X |

|         |                                                                                                                             |  |  |  |   |
|---------|-----------------------------------------------------------------------------------------------------------------------------|--|--|--|---|
| F13.139 | Sedative, hypnotic or anxiolytic abuse with withdrawal, unspecified                                                         |  |  |  | X |
| F13.14  | Sedative, hypnotic or anxiolytic abuse with sedative, hypnotic or anxiolytic-induced mood disorder                          |  |  |  | X |
| F13.15  | Sedative, hypnotic or anxiolytic abuse with sedative, hypnotic or anxiolytic-induced psychotic disorder                     |  |  |  | X |
| F13.150 | Sedative, hypnotic or anxiolytic abuse with sedative, hypnotic or anxiolytic-induced psychotic disorder with delusions      |  |  |  | X |
| F13.151 | Sedative, hypnotic or anxiolytic abuse with sedative, hypnotic or anxiolytic-induced psychotic disorder with hallucinations |  |  |  | X |
| F13.159 | Sedative, hypnotic or anxiolytic abuse with sedative, hypnotic or anxiolytic-induced psychotic disorder, unspecified        |  |  |  | X |
| F13.18  | Sedative, hypnotic or anxiolytic abuse with other sedative, hypnotic or anxiolytic-induced disorders                        |  |  |  | X |
| F13.180 | Sedative, hypnotic or anxiolytic abuse with sedative, hypnotic or anxiolytic-induced anxiety disorder                       |  |  |  | X |
| F13.181 | Sedative, hypnotic or anxiolytic abuse with sedative, hypnotic or anxiolytic-induced sexual dysfunction                     |  |  |  | X |
| F13.182 | Sedative, hypnotic or anxiolytic abuse with sedative, hypnotic or anxiolytic-induced sleep disorder                         |  |  |  | X |
| F13.188 | Sedative, hypnotic or anxiolytic abuse with other sedative, hypnotic or anxiolytic-induced disorder                         |  |  |  | X |
| F13.19  | Sedative, hypnotic or anxiolytic abuse with unspecified sedative, hypnotic or anxiolytic-induced disorder                   |  |  |  | X |
| F13.2   | Sedative, hypnotic or anxiolytic-related dependence                                                                         |  |  |  | X |
| F13.20  | Sedative, hypnotic or anxiolytic dependence, uncomplicated                                                                  |  |  |  | X |
| F13.21  | Sedative, hypnotic or anxiolytic dependence, in remission                                                                   |  |  |  | X |
| F13.22  | Sedative, hypnotic or anxiolytic dependence with intoxication                                                               |  |  |  | X |
| F13.220 | Sedative, hypnotic or anxiolytic dependence with intoxication, uncomplicated                                                |  |  |  | X |
| F13.221 | Sedative, hypnotic or anxiolytic dependence with intoxication delirium                                                      |  |  |  | X |



|         |                                                                                                                                  |  |  |  |   |
|---------|----------------------------------------------------------------------------------------------------------------------------------|--|--|--|---|
| F13.229 | Sedative, hypnotic or anxiolytic dependence with intoxication, unspecified                                                       |  |  |  | X |
| F13.23  | Sedative, hypnotic or anxiolytic dependence with withdrawal                                                                      |  |  |  | X |
| F13.230 | Sedative, hypnotic or anxiolytic dependence with withdrawal, uncomplicated                                                       |  |  |  | X |
| F13.231 | Sedative, hypnotic or anxiolytic dependence with withdrawal delirium                                                             |  |  |  | X |
| F13.232 | Sedative, hypnotic or anxiolytic dependence with withdrawal with perceptual disturbance                                          |  |  |  | X |
| F13.239 | Sedative, hypnotic or anxiolytic dependence with withdrawal, unspecified                                                         |  |  |  | X |
| F13.24  | Sedative, hypnotic or anxiolytic dependence with sedative, hypnotic or anxiolytic-induced mood disorder                          |  |  |  | X |
| F13.25  | Sedative, hypnotic or anxiolytic dependence with sedative, hypnotic or anxiolytic-induced psychotic disorder                     |  |  |  | X |
| F13.250 | Sedative, hypnotic or anxiolytic dependence with sedative, hypnotic or anxiolytic-induced psychotic disorder with delusions      |  |  |  | X |
| F13.251 | Sedative, hypnotic or anxiolytic dependence with sedative, hypnotic or anxiolytic-induced psychotic disorder with hallucinations |  |  |  | X |
| F13.259 | Sedative, hypnotic or anxiolytic dependence with sedative, hypnotic or anxiolytic-induced psychotic disorder, unspecified        |  |  |  | X |
| F13.26  | Sedative, hypnotic or anxiolytic dependence with sedative, hypnotic or anxiolytic-induced persisting amnestic disorder           |  |  |  | X |
| F13.27  | Sedative, hypnotic or anxiolytic dependence with sedative, hypnotic or anxiolytic-induced persisting dementia                    |  |  |  | X |
| F13.28  | Sedative, hypnotic or anxiolytic dependence with other sedative, hypnotic or anxiolytic-induced disorders                        |  |  |  | X |
| F13.280 | Sedative, hypnotic or anxiolytic dependence with sedative, hypnotic or anxiolytic-induced anxiety disorder                       |  |  |  | X |
| F13.281 | Sedative, hypnotic or anxiolytic dependence with sedative, hypnotic or anxiolytic-induced sexual dysfunction                     |  |  |  | X |
| F13.282 | Sedative, hypnotic or anxiolytic dependence with sedative, hypnotic or anxiolytic-induced sleep disorder                         |  |  |  | X |

|         |                                                                                                                                        |  |  |  |   |
|---------|----------------------------------------------------------------------------------------------------------------------------------------|--|--|--|---|
| F13.288 | Sedative, hypnotic or anxiolytic dependence with other sedative, hypnotic or anxiolytic-induced disorder                               |  |  |  | X |
| F13.29  | Sedative, hypnotic or anxiolytic dependence with unspecified sedative, hypnotic or anxiolytic-induced disorder                         |  |  |  | X |
| F13.9   | Sedative, hypnotic or anxiolytic-related use, unspecified                                                                              |  |  |  | X |
| F13.90  | Sedative, hypnotic, or anxiolytic use, unspecified, uncomplicated                                                                      |  |  |  | X |
| F13.92  | Sedative, hypnotic or anxiolytic use, unspecified with intoxication                                                                    |  |  |  | X |
| F13.920 | Sedative, hypnotic or anxiolytic use, unspecified with intoxication, uncomplicated                                                     |  |  |  | X |
| F13.921 | Sedative, hypnotic or anxiolytic use, unspecified with intoxication delirium                                                           |  |  |  | X |
| F13.929 | Sedative, hypnotic or anxiolytic use, unspecified with intoxication, unspecified                                                       |  |  |  | X |
| F13.93  | Sedative, hypnotic or anxiolytic use, unspecified with withdrawal                                                                      |  |  |  | X |
| F13.930 | Sedative, hypnotic or anxiolytic use, unspecified with withdrawal, uncomplicated                                                       |  |  |  | X |
| F13.931 | Sedative, hypnotic or anxiolytic use, unspecified with withdrawal delirium                                                             |  |  |  | X |
| F13.932 | Sedative, hypnotic or anxiolytic use, unspecified with withdrawal with perceptual disturbances                                         |  |  |  | X |
| F13.939 | Sedative, hypnotic or anxiolytic use, unspecified with withdrawal, unspecified                                                         |  |  |  | X |
| F13.94  | Sedative, hypnotic or anxiolytic use, unspecified with sedative, hypnotic or anxiolytic-induced mood disorder                          |  |  |  | X |
| F13.95  | Sedative, hypnotic or anxiolytic use, unspecified with sedative, hypnotic or anxiolytic-induced psychotic disorder                     |  |  |  | X |
| F13.950 | Sedative, hypnotic or anxiolytic use, unspecified with sedative, hypnotic or anxiolytic-induced psychotic disorder with delusions      |  |  |  | X |
| F13.951 | Sedative, hypnotic or anxiolytic use, unspecified with sedative, hypnotic or anxiolytic-induced psychotic disorder with hallucinations |  |  |  | X |
| F13.959 | Sedative, hypnotic or anxiolytic use, unspecified with sedative, hypnotic or anxiolytic-induced psychotic disorder, unspecified        |  |  |  | X |

|         |                                                                                                                              |  |  |  |   |
|---------|------------------------------------------------------------------------------------------------------------------------------|--|--|--|---|
| F13.96  | Sedative, hypnotic or anxiolytic use, unspecified with sedative, hypnotic or anxiolytic-induced persisting amnestic disorder |  |  |  | X |
| F13.97  | Sedative, hypnotic or anxiolytic use, unspecified with sedative, hypnotic or anxiolytic-induced persisting dementia          |  |  |  | X |
| F13.98  | Sedative, hypnotic or anxiolytic use, unspecified with other sedative, hypnotic or anxiolytic-induced disorders              |  |  |  | X |
| F13.980 | Sedative, hypnotic or anxiolytic use, unspecified with sedative, hypnotic or anxiolytic-induced anxiety disorder             |  |  |  | X |
| F13.981 | Sedative, hypnotic or anxiolytic use, unspecified with sedative, hypnotic or anxiolytic-induced sexual dysfunction           |  |  |  | X |
| F13.982 | Sedative, hypnotic or anxiolytic use, unspecified with sedative, hypnotic or anxiolytic-induced sleep disorder               |  |  |  | X |
| F13.988 | Sedative, hypnotic or anxiolytic use, unspecified with other sedative, hypnotic or anxiolytic-induced disorder               |  |  |  | X |
| F13.99  | Sedative, hypnotic or anxiolytic use, unspecified with unspecified sedative, hypnotic or anxiolytic-induced disorder         |  |  |  | X |
| F14.    | Cocaine related disorders                                                                                                    |  |  |  | X |
| F14.1   | Cocaine abuse                                                                                                                |  |  |  | X |
| F14.10  | Cocaine abuse, uncomplicated                                                                                                 |  |  |  | X |
| F14.11  | Cocaine abuse, in remission                                                                                                  |  |  |  | X |
| F14.12  | Cocaine abuse with intoxication                                                                                              |  |  |  | X |
| F14.120 | Cocaine abuse with intoxication, uncomplicated                                                                               |  |  |  | X |
| F14.121 | Cocaine abuse with intoxication with delirium                                                                                |  |  |  | X |
| F14.122 | Cocaine abuse with intoxication with perceptual disturbance                                                                  |  |  |  | X |
| F14.129 | Cocaine abuse with intoxication, unspecified                                                                                 |  |  |  | X |
| F14.13  | Cocaine abuse, unspecified with withdrawal                                                                                   |  |  |  | X |
| F14.14  | Cocaine abuse with cocaine-induced mood disorder                                                                             |  |  |  | X |
| F14.15  | Cocaine abuse with cocaine-induced psychotic disorder                                                                        |  |  |  | X |
| F14.150 | Cocaine abuse with cocaine-induced psychotic disorder with delusions                                                         |  |  |  | X |
| F14.151 | Cocaine abuse with cocaine-induced psychotic disorder with hallucinations                                                    |  |  |  | X |
| F14.159 | Cocaine abuse with cocaine-induced psychotic disorder, unspecified                                                           |  |  |  | X |

|         |                                                                                |  |  |  |   |
|---------|--------------------------------------------------------------------------------|--|--|--|---|
| F14.18  | Cocaine abuse with other cocaine-induced disorder                              |  |  |  | X |
| F14.180 | Cocaine abuse with cocaine-induced anxiety disorder                            |  |  |  | X |
| F14.181 | Cocaine abuse with cocaine-induced sexual dysfunction                          |  |  |  | X |
| F14.182 | Cocaine abuse with cocaine-induced sleep disorder                              |  |  |  | X |
| F14.188 | Cocaine abuse with other cocaine-induced disorder                              |  |  |  | X |
| F14.19  | Cocaine abuse with unspecified cocaine-induced disorder                        |  |  |  | X |
| F14.2   | Cocaine dependence                                                             |  |  |  | X |
| F14.20  | Cocaine dependence, uncomplicated                                              |  |  |  | X |
| F14.21  | Cocaine dependence, in remission                                               |  |  |  | X |
| F14.22  | Cocaine dependence with intoxication                                           |  |  |  | X |
| F14.220 | Cocaine dependence with intoxication, uncomplicated                            |  |  |  | X |
| F14.221 | Cocaine dependence with intoxication delirium                                  |  |  |  | X |
| F14.222 | Cocaine dependence with intoxication with perceptual disturbance               |  |  |  | X |
| F14.229 | Cocaine dependence with intoxication, unspecified                              |  |  |  | X |
| F14.23  | Cocaine dependence with withdrawal                                             |  |  |  | X |
| F14.24  | Cocaine dependence with cocaine-induced mood disorder                          |  |  |  | X |
| F14.25  | Cocaine dependence with cocaine-induced psychotic disorder                     |  |  |  | X |
| F14.250 | Cocaine dependence with cocaine-induced psychotic disorder with delusions      |  |  |  | X |
| F14.251 | Cocaine dependence with cocaine-induced psychotic disorder with hallucinations |  |  |  | X |
| F14.259 | Cocaine dependence with cocaine-induced psychotic disorder, unspecified        |  |  |  | X |
| F14.28  | Cocaine dependence with other cocaine-induced disorder                         |  |  |  | X |
| F14.280 | Cocaine dependence with cocaine-induced anxiety disorder                       |  |  |  | X |
| F14.281 | Cocaine dependence with cocaine-induced sexual dysfunction                     |  |  |  | X |
| F14.282 | Cocaine dependence with cocaine-induced sleep disorder                         |  |  |  | X |
| F14.288 | Cocaine dependence with other cocaine-induced disorder                         |  |  |  | X |
| F14.29  | Cocaine dependence with unspecified cocaine-induced disorder                   |  |  |  | X |

|         |                                                                                      |  |  |  |   |
|---------|--------------------------------------------------------------------------------------|--|--|--|---|
| F14.9   | Cocaine use, unspecified                                                             |  |  |  | X |
| F14.90  | Cocaine use, unspecified, uncomplicated                                              |  |  |  | X |
| F14.92  | Cocaine use, unspecified with intoxication                                           |  |  |  | X |
| F14.920 | Cocaine use, unspecified with intoxication, uncomplicated                            |  |  |  | X |
| F14.921 | Cocaine use, unspecified with intoxication delirium                                  |  |  |  | X |
| F14.922 | Cocaine use, unspecified with intoxication with perceptual disturbance               |  |  |  | X |
| F14.929 | Cocaine use, unspecified with intoxication, unspecified                              |  |  |  | X |
| F14.93  | Cocaine use, unspecified with withdrawal                                             |  |  |  | X |
| F14.94  | Cocaine use, unspecified with cocaine-induced mood disorder                          |  |  |  | X |
| F14.95  | Cocaine use, unspecified with cocaine-induced psychotic disorder                     |  |  |  | X |
| F14.950 | Cocaine use, unspecified with cocaine-induced psychotic disorder with delusions      |  |  |  | X |
| F14.951 | Cocaine use, unspecified with cocaine-induced psychotic disorder with hallucinations |  |  |  | X |
| F14.959 | Cocaine use, unspecified with cocaine-induced psychotic disorder, unspecified        |  |  |  | X |
| F14.98  | Cocaine use, unspecified with other specified cocaine-induced disorder               |  |  |  | X |
| F14.980 | Cocaine use, unspecified with cocaine-induced anxiety disorder                       |  |  |  | X |
| F14.981 | Cocaine use, unspecified with cocaine-induced sexual dysfunction                     |  |  |  | X |
| F14.982 | Cocaine use, unspecified with cocaine-induced sleep disorder                         |  |  |  | X |
| F14.988 | Cocaine use, unspecified with other cocaine-induced disorder                         |  |  |  | X |
| F14.99  | Cocaine use, unspecified with unspecified cocaine-induced disorder                   |  |  |  | X |
| F15.    | Other stimulant related disorders                                                    |  |  |  | X |
| F15.1   | Other stimulant abuse                                                                |  |  |  | X |
| F15.10  | Other stimulant abuse, uncomplicated                                                 |  |  |  | X |
| F15.11  | Other stimulant abuse, in remission                                                  |  |  |  | X |
| F15.12  | Other stimulant abuse with intoxication                                              |  |  |  | X |
| F15.120 | Other stimulant abuse with intoxication, uncomplicated                               |  |  |  | X |
| F15.121 | Other stimulant abuse with intoxication delirium                                     |  |  |  | X |
| F15.122 | Other stimulant abuse with intoxication with perceptual disturbance                  |  |  |  | X |

|         |                                                                                          |  |  |  |   |
|---------|------------------------------------------------------------------------------------------|--|--|--|---|
| F15.129 | Other stimulant abuse with intoxication, unspecified                                     |  |  |  | X |
| F15.13  | Other stimulant abuse with withdrawal                                                    |  |  |  | X |
| F15.14  | Other stimulant abuse with stimulant-induced mood disorder                               |  |  |  | X |
| F15.15  | Other stimulant abuse with stimulant-induced psychotic disorder                          |  |  |  | X |
| F15.150 | Other stimulant abuse with stimulant-induced psychotic disorder with delusions           |  |  |  | X |
| F15.151 | Other stimulant abuse with stimulant-induced psychotic disorder with hallucinations      |  |  |  | X |
| F15.159 | Other stimulant abuse with stimulant-induced psychotic disorder, unspecified             |  |  |  | X |
| F15.18  | Other stimulant abuse with other stimulant-induced disorder                              |  |  |  | X |
| F15.180 | Other stimulant abuse with stimulant-induced anxiety disorder                            |  |  |  | X |
| F15.181 | Other stimulant abuse with stimulant-induced sexual dysfunction                          |  |  |  | X |
| F15.182 | Other stimulant abuse with stimulant-induced sleep disorder                              |  |  |  | X |
| F15.188 | Other stimulant abuse with other stimulant-induced disorder                              |  |  |  | X |
| F15.19  | Other stimulant abuse with unspecified stimulant-induced disorder                        |  |  |  | X |
| F15.2   | Other stimulant dependence                                                               |  |  |  | X |
| F15.20  | Other stimulant dependence, uncomplicated                                                |  |  |  | X |
| F15.21  | Other stimulant dependence, in remission                                                 |  |  |  | X |
| F15.22  | Other stimulant dependence with intoxication                                             |  |  |  | X |
| F15.220 | Other stimulant dependence with intoxication, uncomplicated                              |  |  |  | X |
| F15.221 | Other stimulant dependence with intoxication delirium                                    |  |  |  | X |
| F15.222 | Other stimulant dependence with intoxication with perceptual disturbance                 |  |  |  | X |
| F15.229 | Other stimulant dependence with intoxication, unspecified                                |  |  |  | X |
| F15.23  | Other stimulant dependence with withdrawal                                               |  |  |  | X |
| F15.24  | Other stimulant dependence with stimulant-induced mood disorder                          |  |  |  | X |
| F15.25  | Other stimulant dependence with stimulant-induced psychotic disorder                     |  |  |  | X |
| F15.250 | Other stimulant dependence with stimulant-induced psychotic disorder with delusions      |  |  |  | X |
| F15.251 | Other stimulant dependence with stimulant-induced psychotic disorder with hallucinations |  |  |  | X |

|         |                                                                                                |  |  |  |   |
|---------|------------------------------------------------------------------------------------------------|--|--|--|---|
| F15.259 | Other stimulant dependence with stimulant-induced psychotic disorder, unspecified              |  |  |  | X |
| F15.28  | Other stimulant dependence with other stimulant-induced disorder                               |  |  |  | X |
| F15.280 | Other stimulant dependence with stimulant-induced anxiety disorder                             |  |  |  | X |
| F15.281 | Other stimulant dependence with stimulant-induced sexual dysfunction                           |  |  |  | X |
| F15.282 | Other stimulant dependence with stimulant-induced sleep disorder                               |  |  |  | X |
| F15.288 | Other stimulant dependence with other stimulant-induced disorder                               |  |  |  | X |
| F15.29  | Other stimulant dependence with unspecified stimulant-induced disorder                         |  |  |  | X |
| F15.9   | Other stimulant use, unspecified                                                               |  |  |  | X |
| F15.90  | Other stimulant use, unspecified, uncomplicated                                                |  |  |  | X |
| F15.92  | Other stimulant use, unspecified with intoxication                                             |  |  |  | X |
| F15.920 | Other stimulant use, unspecified with intoxication, uncomplicated                              |  |  |  | X |
| F15.921 | Other stimulant use, unspecified with intoxication delirium                                    |  |  |  | X |
| F15.922 | Other stimulant use, unspecified with intoxication with perceptual disturbance                 |  |  |  | X |
| F15.929 | Other stimulant use, unspecified with intoxication, unspecified                                |  |  |  | X |
| F15.93  | Other stimulant use, unspecified with withdrawal                                               |  |  |  | X |
| F15.94  | Other stimulant use, unspecified with stimulant-induced mood disorder                          |  |  |  | X |
| F15.95  | Other stimulant use, unspecified with stimulant-induced psychotic disorder                     |  |  |  | X |
| F15.950 | Other stimulant use, unspecified with stimulant-induced psychotic disorder with delusions      |  |  |  | X |
| F15.951 | Other stimulant use, unspecified with stimulant-induced psychotic disorder with hallucinations |  |  |  | X |
| F15.959 | Other stimulant use, unspecified with stimulant-induced psychotic disorder, unspecified        |  |  |  | X |
| F15.98  | Other stimulant use, unspecified with other stimulant-induced disorder                         |  |  |  | X |
| F15.980 | Other stimulant use, unspecified with stimulant-induced anxiety disorder                       |  |  |  | X |

|         |                                                                                     |  |  |  |   |
|---------|-------------------------------------------------------------------------------------|--|--|--|---|
| F15.981 | Other stimulant use, unspecified with stimulant-induced sexual dysfunction          |  |  |  | X |
| F15.982 | Other stimulant use, unspecified with stimulant-induced sleep disorder              |  |  |  | X |
| F15.988 | Other stimulant use, unspecified with other stimulant-induced disorder              |  |  |  | X |
| F15.99  | Other stimulant use, unspecified with unspecified stimulant-induced disorder        |  |  |  | X |
| F16.    | Hallucinogen related disorders                                                      |  |  |  | X |
| F16.1   | Hallucinogen abuse                                                                  |  |  |  | X |
| F16.10  | Hallucinogen abuse, uncomplicated                                                   |  |  |  | X |
| F16.11  | Hallucinogen abuse, in remission                                                    |  |  |  | X |
| F16.12  | Hallucinogen abuse with intoxication                                                |  |  |  | X |
| F16.120 | Hallucinogen abuse with intoxication, uncomplicated                                 |  |  |  | X |
| F16.121 | Hallucinogen abuse with intoxication with delirium                                  |  |  |  | X |
| F16.122 | Hallucinogen abuse with intoxication with perceptual disturbance                    |  |  |  | X |
| F16.129 | Hallucinogen abuse with intoxication, unspecified                                   |  |  |  | X |
| F16.14  | Hallucinogen abuse with hallucinogen-induced mood disorder                          |  |  |  | X |
| F16.15  | Hallucinogen abuse with hallucinogen-induced psychotic disorder                     |  |  |  | X |
| F16.150 | Hallucinogen abuse with hallucinogen-induced psychotic disorder with delusions      |  |  |  | X |
| F16.151 | Hallucinogen abuse with hallucinogen-induced psychotic disorder with hallucinations |  |  |  | X |
| F16.159 | Hallucinogen abuse with hallucinogen-induced psychotic disorder, unspecified        |  |  |  | X |
| F16.18  | Hallucinogen abuse with other hallucinogen-induced disorder                         |  |  |  | X |
| F16.180 | Hallucinogen abuse with hallucinogen-induced anxiety disorder                       |  |  |  | X |
| F16.183 | Hallucinogen abuse with hallucinogen persisting perception disorder (flashbacks)    |  |  |  | X |
| F16.188 | Hallucinogen abuse with other hallucinogen-induced disorder                         |  |  |  | X |
| F16.19  | Hallucinogen abuse with unspecified hallucinogen-induced disorder                   |  |  |  | X |
| F16.2   | Hallucinogen dependence                                                             |  |  |  | X |
| F16.20  | Hallucinogen dependence, uncomplicated                                              |  |  |  | X |
| F16.21  | Hallucinogen dependence, in remission                                               |  |  |  | X |
| F16.22  | Hallucinogen dependence with intoxication                                           |  |  |  | X |



|         |                                                                                                |  |  |  |   |
|---------|------------------------------------------------------------------------------------------------|--|--|--|---|
| F16.220 | Hallucinogen dependence with intoxication, uncomplicated                                       |  |  |  | X |
| F16.221 | Hallucinogen dependence with intoxication with delirium                                        |  |  |  | X |
| F16.229 | Hallucinogen dependence with intoxication, unspecified                                         |  |  |  | X |
| F16.24  | Hallucinogen dependence with hallucinogen-induced mood disorder                                |  |  |  | X |
| F16.25  | Hallucinogen dependence with hallucinogen-induced psychotic disorder                           |  |  |  | X |
| F16.250 | Hallucinogen dependence with hallucinogen-induced psychotic disorder with delusions            |  |  |  | X |
| F16.251 | Hallucinogen dependence with hallucinogen-induced psychotic disorder with hallucinations       |  |  |  | X |
| F16.259 | Hallucinogen dependence with hallucinogen-induced psychotic disorder, unspecified              |  |  |  | X |
| F16.28  | Hallucinogen dependence with other hallucinogen-induced disorder                               |  |  |  | X |
| F16.280 | Hallucinogen dependence with hallucinogen-induced anxiety disorder                             |  |  |  | X |
| F16.283 | Hallucinogen dependence with hallucinogen persisting perception disorder (flashbacks)          |  |  |  | X |
| F16.288 | Hallucinogen dependence with other hallucinogen-induced disorder                               |  |  |  | X |
| F16.29  | Hallucinogen dependence with unspecified hallucinogen-induced disorder                         |  |  |  | X |
| F16.9   | Hallucinogen use, unspecified                                                                  |  |  |  | X |
| F16.90  | Hallucinogen use, unspecified, uncomplicated                                                   |  |  |  | X |
| F16.92  | Hallucinogen use, unspecified with intoxication                                                |  |  |  | X |
| F16.920 | Hallucinogen use, unspecified with intoxication, uncomplicated                                 |  |  |  | X |
| F16.921 | Hallucinogen use, unspecified with intoxication with delirium                                  |  |  |  | X |
| F16.929 | Hallucinogen use, unspecified with intoxication, unspecified                                   |  |  |  | X |
| F16.94  | Hallucinogen use, unspecified with hallucinogen-induced mood disorder                          |  |  |  | X |
| F16.95  | Hallucinogen use, unspecified with hallucinogen-induced psychotic disorder                     |  |  |  | X |
| F16.950 | Hallucinogen use, unspecified with hallucinogen-induced psychotic disorder with delusions      |  |  |  | X |
| F16.951 | Hallucinogen use, unspecified with hallucinogen-induced psychotic disorder with hallucinations |  |  |  | X |

|         |                                                                                             |  |  |  |   |
|---------|---------------------------------------------------------------------------------------------|--|--|--|---|
| F16.959 | Hallucinogen use, unspecified with hallucinogen-induced psychotic disorder, unspecified     |  |  |  | X |
| F16.98  | Hallucinogen use, unspecified with other specified hallucinogen-induced disorder            |  |  |  | X |
| F16.980 | Hallucinogen use, unspecified with hallucinogen-induced anxiety disorder                    |  |  |  | X |
| F16.983 | Hallucinogen use, unspecified with hallucinogen persisting perception disorder (flashbacks) |  |  |  | X |
| F16.988 | Hallucinogen use, unspecified with other hallucinogen-induced disorder                      |  |  |  | X |
| F16.99  | Hallucinogen use, unspecified with unspecified hallucinogen-induced disorder                |  |  |  | X |
| F18.    | Inhalant related disorders                                                                  |  |  |  | X |
| F18.1   | Inhalant abuse                                                                              |  |  |  | X |
| F18.10  | Inhalant abuse, uncomplicated                                                               |  |  |  | X |
| F18.11  | Inhalant abuse, in remission                                                                |  |  |  | X |
| F18.12  | Inhalant abuse with intoxication                                                            |  |  |  | X |
| F18.120 | Inhalant abuse with intoxication, uncomplicated                                             |  |  |  | X |
| F18.121 | Inhalant abuse with intoxication delirium                                                   |  |  |  | X |
| F18.129 | Inhalant abuse with intoxication, unspecified                                               |  |  |  | X |
| F18.14  | Inhalant abuse with inhalant-induced mood disorder                                          |  |  |  | X |
| F18.15  | Inhalant abuse with inhalant-induced psychotic disorder                                     |  |  |  | X |
| F18.150 | Inhalant abuse with inhalant-induced psychotic disorder with delusions                      |  |  |  | X |
| F18.151 | Inhalant abuse with inhalant-induced psychotic disorder with hallucinations                 |  |  |  | X |
| F18.159 | Inhalant abuse with inhalant-induced psychotic disorder, unspecified                        |  |  |  | X |
| F18.17  | Inhalant abuse with inhalant-induced dementia                                               |  |  |  | X |
| F18.18  | Inhalant abuse with other inhalant-induced disorders                                        |  |  |  | X |
| F18.180 | Inhalant abuse with inhalant-induced anxiety disorder                                       |  |  |  | X |
| F18.188 | Inhalant abuse with other inhalant-induced disorder                                         |  |  |  | X |
| F18.19  | Inhalant abuse with unspecified inhalant-induced disorder                                   |  |  |  | X |
| F18.2   | Inhalant dependence                                                                         |  |  |  | X |
| F18.20  | Inhalant dependence, uncomplicated                                                          |  |  |  | X |
| F18.21  | Inhalant dependence, in remission                                                           |  |  |  | X |

|         |                                                                                        |  |  |  |   |
|---------|----------------------------------------------------------------------------------------|--|--|--|---|
| F18.22  | Inhalant dependence with intoxication                                                  |  |  |  | X |
| F18.220 | Inhalant dependence with intoxication, uncomplicated                                   |  |  |  | X |
| F18.221 | Inhalant dependence with intoxication delirium                                         |  |  |  | X |
| F18.229 | Inhalant dependence with intoxication, unspecified                                     |  |  |  | X |
| F18.24  | Inhalant dependence with inhalant-induced mood disorder                                |  |  |  | X |
| F18.25  | Inhalant dependence with inhalant-induced psychotic disorder                           |  |  |  | X |
| F18.250 | Inhalant dependence with inhalant-induced psychotic disorder with delusions            |  |  |  | X |
| F18.251 | Inhalant dependence with inhalant-induced psychotic disorder with hallucinations       |  |  |  | X |
| F18.259 | Inhalant dependence with inhalant-induced psychotic disorder, unspecified              |  |  |  | X |
| F18.27  | Inhalant dependence with inhalant-induced dementia                                     |  |  |  | X |
| F18.28  | Inhalant dependence with other inhalant-induced disorders                              |  |  |  | X |
| F18.280 | Inhalant dependence with inhalant-induced anxiety disorder                             |  |  |  | X |
| F18.288 | Inhalant dependence with other inhalant-induced disorder                               |  |  |  | X |
| F18.29  | Inhalant dependence with unspecified inhalant-induced disorder                         |  |  |  | X |
| F18.9   | Inhalant use, unspecified                                                              |  |  |  | X |
| F18.90  | Inhalant use, unspecified, uncomplicated                                               |  |  |  | X |
| F18.92  | Inhalant use, unspecified with intoxication                                            |  |  |  | X |
| F18.920 | Inhalant use, unspecified with intoxication, uncomplicated                             |  |  |  | X |
| F18.921 | Inhalant use, unspecified with intoxication with delirium                              |  |  |  | X |
| F18.929 | Inhalant use, unspecified with intoxication, unspecified                               |  |  |  | X |
| F18.94  | Inhalant use, unspecified with inhalant-induced mood disorder                          |  |  |  | X |
| F18.95  | Inhalant use, unspecified with inhalant-induced psychotic disorder                     |  |  |  | X |
| F18.950 | Inhalant use, unspecified with inhalant-induced psychotic disorder with delusions      |  |  |  | X |
| F18.951 | Inhalant use, unspecified with inhalant-induced psychotic disorder with hallucinations |  |  |  | X |
| F18.959 | Inhalant use, unspecified with inhalant-induced psychotic disorder, unspecified        |  |  |  | X |

|         |                                                                                                          |  |  |  |   |
|---------|----------------------------------------------------------------------------------------------------------|--|--|--|---|
| F18.97  | Inhalant use, unspecified with inhalant-induced persisting dementia                                      |  |  |  | X |
| F18.98  | Inhalant use, unspecified with other inhalant-induced disorders                                          |  |  |  | X |
| F18.980 | Inhalant use, unspecified with inhalant-induced anxiety disorder                                         |  |  |  | X |
| F18.988 | Inhalant use, unspecified with other inhalant-induced disorder                                           |  |  |  | X |
| F18.99  | Inhalant use, unspecified with unspecified inhalant-induced disorder                                     |  |  |  | X |
| F19.    | Other psychoactive substance related disorders                                                           |  |  |  | X |
| F19.1   | Other psychoactive substance abuse                                                                       |  |  |  | X |
| F19.10  | Other psychoactive substance abuse, uncomplicated                                                        |  |  |  | X |
| F19.11  | Other psychoactive substance abuse, in remission                                                         |  |  |  | X |
| F19.12  | Other psychoactive substance abuse with intoxication                                                     |  |  |  | X |
| F19.120 | Other psychoactive substance abuse with intoxication, uncomplicated                                      |  |  |  | X |
| F19.121 | Other psychoactive substance abuse with intoxication delirium                                            |  |  |  | X |
| F19.122 | Other psychoactive substance abuse with intoxication with perceptual disturbances                        |  |  |  | X |
| F19.129 | Other psychoactive substance abuse with intoxication, unspecified                                        |  |  |  | X |
| F19.13  | Other psychoactive substance abuse with withdrawal                                                       |  |  |  | X |
| F19.130 | Other psychoactive substance abuse with withdrawal, uncomplicated                                        |  |  |  | X |
| F19.131 | Other psychoactive substance abuse with withdrawal delirium                                              |  |  |  | X |
| F19.132 | Other psychoactive substance abuse with withdrawal with perceptual disturbance                           |  |  |  | X |
| F19.139 | Other psychoactive substance abuse with withdrawal, unspecified                                          |  |  |  | X |
| F19.14  | Other psychoactive substance abuse with psychoactive substance-induced mood disorder                     |  |  |  | X |
| F19.15  | Other psychoactive substance abuse with psychoactive substance-induced psychotic disorder                |  |  |  | X |
| F19.150 | Other psychoactive substance abuse with psychoactive substance-induced psychotic disorder with delusions |  |  |  | X |

|         |                                                                                                               |  |  |  |   |
|---------|---------------------------------------------------------------------------------------------------------------|--|--|--|---|
| F19.151 | Other psychoactive substance abuse with psychoactive substance-induced psychotic disorder with hallucinations |  |  |  | X |
| F19.159 | Other psychoactive substance abuse with psychoactive substance-induced psychotic disorder, unspecified        |  |  |  | X |
| F19.16  | Other psychoactive substance abuse with psychoactive substance-induced persisting amnesic disorder            |  |  |  | X |
| F19.17  | Other psychoactive substance abuse with psychoactive substance-induced persisting dementia                    |  |  |  | X |
| F19.18  | Other psychoactive substance abuse with other psychoactive substance-induced disorders                        |  |  |  | X |
| F19.180 | Other psychoactive substance abuse with psychoactive substance-induced anxiety disorder                       |  |  |  | X |
| F19.181 | Other psychoactive substance abuse with psychoactive substance-induced sexual dysfunction                     |  |  |  | X |
| F19.182 | Other psychoactive substance abuse with psychoactive substance-induced sleep disorder                         |  |  |  | X |
| F19.188 | Other psychoactive substance abuse with other psychoactive substance-induced disorder                         |  |  |  | X |
| F19.19  | Other psychoactive substance abuse with unspecified psychoactive substance-induced disorder                   |  |  |  | X |
| F19.2   | Other psychoactive substance dependence                                                                       |  |  |  | X |
| F19.20  | Other psychoactive substance dependence, uncomplicated                                                        |  |  |  | X |
| F19.21  | Other psychoactive substance dependence, in remission                                                         |  |  |  | X |
| F19.22  | Other psychoactive substance dependence with intoxication                                                     |  |  |  | X |
| F19.220 | Other psychoactive substance dependence with intoxication, uncomplicated                                      |  |  |  | X |
| F19.221 | Other psychoactive substance dependence with intoxication delirium                                            |  |  |  | X |
| F19.222 | Other psychoactive substance dependence with intoxication with perceptual disturbance                         |  |  |  | X |
| F19.229 | Other psychoactive substance dependence with intoxication, unspecified                                        |  |  |  | X |
| F19.23  | Other psychoactive substance dependence with withdrawal                                                       |  |  |  | X |
| F19.230 | Other psychoactive substance dependence with withdrawal, uncomplicated                                        |  |  |  | X |

|         |                                                                                                                    |  |  |  |   |
|---------|--------------------------------------------------------------------------------------------------------------------|--|--|--|---|
| F19.231 | Other psychoactive substance dependence with withdrawal delirium                                                   |  |  |  | X |
| F19.232 | Other psychoactive substance dependence with withdrawal with perceptual disturbance                                |  |  |  | X |
| F19.239 | Other psychoactive substance dependence with withdrawal, unspecified                                               |  |  |  | X |
| F19.24  | Other psychoactive substance dependence with psychoactive substance-induced mood disorder                          |  |  |  | X |
| F19.25  | Other psychoactive substance dependence with psychoactive substance-induced psychotic disorder                     |  |  |  | X |
| F19.250 | Other psychoactive substance dependence with psychoactive substance-induced psychotic disorder with delusions      |  |  |  | X |
| F19.251 | Other psychoactive substance dependence with psychoactive substance-induced psychotic disorder with hallucinations |  |  |  | X |
| F19.259 | Other psychoactive substance dependence with psychoactive substance-induced psychotic disorder, unspecified        |  |  |  | X |
| F19.26  | Other psychoactive substance dependence with psychoactive substance-induced persisting amnesic disorder            |  |  |  | X |
| F19.27  | Other psychoactive substance dependence with psychoactive substance-induced persisting dementia                    |  |  |  | X |
| F19.28  | Other psychoactive substance dependence with other psychoactive substance-induced disorders                        |  |  |  | X |
| F19.280 | Other psychoactive substance dependence with psychoactive substance-induced anxiety disorder                       |  |  |  | X |
| F19.281 | Other psychoactive substance dependence with psychoactive substance-induced sexual dysfunction                     |  |  |  | X |
| F19.282 | Other psychoactive substance dependence with psychoactive substance-induced sleep disorder                         |  |  |  | X |
| F19.288 | Other psychoactive substance dependence with other psychoactive substance-induced disorder                         |  |  |  | X |
| F19.29  | Other psychoactive substance dependence with unspecified psychoactive substance-induced disorder                   |  |  |  | X |
| F19.9   | Other psychoactive substance use, unspecified                                                                      |  |  |  | X |

|         |                                                                                                                          |  |  |  |   |
|---------|--------------------------------------------------------------------------------------------------------------------------|--|--|--|---|
| F19.90  | Other psychoactive substance use, unspecified, uncomplicated                                                             |  |  |  | X |
| F19.92  | Other psychoactive substance use, unspecified with intoxication                                                          |  |  |  | X |
| F19.920 | Other psychoactive substance use, unspecified with intoxication, uncomplicated                                           |  |  |  | X |
| F19.921 | Other psychoactive substance use, unspecified with intoxication with delirium                                            |  |  |  | X |
| F19.922 | Other psychoactive substance use, unspecified with intoxication with perceptual disturbance                              |  |  |  | X |
| F19.929 | Other psychoactive substance use, unspecified with intoxication, unspecified                                             |  |  |  | X |
| F19.93  | Other psychoactive substance use, unspecified with withdrawal                                                            |  |  |  | X |
| F19.930 | Other psychoactive substance use, unspecified with withdrawal, uncomplicated                                             |  |  |  | X |
| F19.931 | Other psychoactive substance use, unspecified with withdrawal delirium                                                   |  |  |  | X |
| F19.932 | Other psychoactive substance use, unspecified with withdrawal with perceptual disturbance                                |  |  |  | X |
| F19.939 | Other psychoactive substance use, unspecified with withdrawal, unspecified                                               |  |  |  | X |
| F19.94  | Other psychoactive substance use, unspecified with psychoactive substance-induced mood disorder                          |  |  |  | X |
| F19.95  | Other psychoactive substance use, unspecified with psychoactive substance-induced psychotic disorder                     |  |  |  | X |
| F19.950 | Other psychoactive substance use, unspecified with psychoactive substance-induced psychotic disorder with delusions      |  |  |  | X |
| F19.951 | Other psychoactive substance use, unspecified with psychoactive substance-induced psychotic disorder with hallucinations |  |  |  | X |
| F19.959 | Other psychoactive substance use, unspecified with psychoactive substance-induced psychotic disorder, unspecified        |  |  |  | X |
| F19.96  | Other psychoactive substance use, unspecified with psychoactive substance-induced persisting amnestic disorder           |  |  |  | X |
| F19.97  | Other psychoactive substance use, unspecified with psychoactive substance-induced persisting dementia                    |  |  |  | X |
| F19.98  | Other psychoactive substance use, unspecified with other psychoactive substance-induced disorders                        |  |  |  | X |

|         |                                                                                                        |  |  |  |   |
|---------|--------------------------------------------------------------------------------------------------------|--|--|--|---|
| F19.980 | Other psychoactive substance use, unspecified with psychoactive substance-induced anxiety disorder     |  |  |  | X |
| F19.981 | Other psychoactive substance use, unspecified with psychoactive substance-induced sexual dysfunction   |  |  |  | X |
| F19.982 | Other psychoactive substance use, unspecified with psychoactive substance-induced sleep disorder       |  |  |  | X |
| F19.988 | Other psychoactive substance use, unspecified with other psychoactive substance-induced disorder       |  |  |  | X |
| F19.99  | Other psychoactive substance use, unspecified with unspecified psychoactive substance-induced disorder |  |  |  | X |
| F06.30  | Mood disorder due to known physiological condition, unspecified                                        |  |  |  |   |
| F06.33  | Mood disorder due to known physiological condition with manic features                                 |  |  |  |   |
| F06.34  | Mood disorder due to known physiological condition with mixed features                                 |  |  |  |   |
| F06.4   | Anxiety disorder due to known physiological condition                                                  |  |  |  |   |
| F21.    | Schizotypal disorder                                                                                   |  |  |  |   |
| F34.    | Persistent mood [affective] disorders                                                                  |  |  |  |   |
| F34.0   | Cyclothymic disorder                                                                                   |  |  |  |   |
| F34.8   | Other Persistent Mood [Affective] Disorders                                                            |  |  |  |   |
| F34.81  | Disruptive mood dysregulation disorder                                                                 |  |  |  |   |
| F34.89  | Other specified persistent mood disorders                                                              |  |  |  |   |
| F34.9   | Persistent mood [affective] disorder, unspecified                                                      |  |  |  |   |
| F39.    | Unspecified mood [affective] disorder                                                                  |  |  |  |   |
| F40.    | Phobic anxiety disorders                                                                               |  |  |  |   |
| F40.0   | Agoraphobia                                                                                            |  |  |  |   |
| F40.00  | Agoraphobia, unspecified                                                                               |  |  |  |   |
| F40.01  | Agoraphobia with panic disorder                                                                        |  |  |  |   |
| F40.02  | Agoraphobia without panic disorder                                                                     |  |  |  |   |
| F40.1   | Social phobias                                                                                         |  |  |  |   |
| F40.10  | Social phobia, unspecified                                                                             |  |  |  |   |
| F40.11  | Social phobia, generalized                                                                             |  |  |  |   |
| F40.2   | Specific (isolated) phobias                                                                            |  |  |  |   |
| F40.21  | Animal type phobia                                                                                     |  |  |  |   |
| F40.210 | Arachnophobia                                                                                          |  |  |  |   |
| F40.218 | Other animal type phobia                                                                               |  |  |  |   |
| F40.22  | Natural environment type phobia                                                                        |  |  |  |   |



|         |                                                                    |  |  |  |  |
|---------|--------------------------------------------------------------------|--|--|--|--|
| F40.220 | Fear of thunderstorms                                              |  |  |  |  |
| F40.228 | Other natural environment type phobia                              |  |  |  |  |
| F40.23  | Blood, injection, injury type phobia                               |  |  |  |  |
| F40.230 | Fear of blood                                                      |  |  |  |  |
| F40.231 | Fear of injections and transfusions                                |  |  |  |  |
| F40.232 | Fear of other medical care                                         |  |  |  |  |
| F40.233 | Fear of injury                                                     |  |  |  |  |
| F40.24  | Situational type phobia                                            |  |  |  |  |
| F40.240 | Claustrophobia                                                     |  |  |  |  |
| F40.241 | Acrophobia                                                         |  |  |  |  |
| F40.242 | Fear of bridges                                                    |  |  |  |  |
| F40.243 | Fear of flying                                                     |  |  |  |  |
| F40.248 | Other situational type phobia                                      |  |  |  |  |
| F40.29  | Other specified phobia                                             |  |  |  |  |
| F40.290 | Androphobia                                                        |  |  |  |  |
| F40.291 | Gynephobia                                                         |  |  |  |  |
| F40.298 | Other specified phobia                                             |  |  |  |  |
| F40.8   | Other phobic anxiety disorders                                     |  |  |  |  |
| F40.9   | Phobic anxiety disorder, unspecified                               |  |  |  |  |
| F41.0   | Panic disorder [episodic paroxysmal anxiety]                       |  |  |  |  |
| F41.1   | Generalized anxiety disorder                                       |  |  |  |  |
| F41.3   | Other mixed anxiety disorders                                      |  |  |  |  |
| F41.8   | Other specified anxiety disorders                                  |  |  |  |  |
| F41.9   | Anxiety disorder, unspecified                                      |  |  |  |  |
| F42.    | Obsessive-Compulsive Disorder                                      |  |  |  |  |
| F42.2   | Mixed obsessional thoughts and acts                                |  |  |  |  |
| F42.3   | Hoarding disorder                                                  |  |  |  |  |
| F42.4   | Excoriation (skin-picking) disorder                                |  |  |  |  |
| F42.8   | Other obsessive-compulsive disorder                                |  |  |  |  |
| F42.9   | Obsessive-compulsive disorder, unspecified                         |  |  |  |  |
| F43.0   | Acute stress reaction                                              |  |  |  |  |
| F43.2   | Adjustment disorders                                               |  |  |  |  |
| F43.20  | Adjustment disorder, unspecified                                   |  |  |  |  |
| F43.21  | Adjustment disorder with depressed mood                            |  |  |  |  |
| F43.22  | Adjustment disorder with anxiety                                   |  |  |  |  |
| F43.23  | Adjustment disorder with mixed anxiety and depressed mood          |  |  |  |  |
| F43.24  | Adjustment disorder with disturbance of conduct                    |  |  |  |  |
| F43.25  | Adjustment disorder with mixed disturbance of emotions and conduct |  |  |  |  |
| F43.29  | Adjustment disorder with other symptoms                            |  |  |  |  |
| F43.8   | Other reactions to severe stress                                   |  |  |  |  |

|        |                                                     |  |  |  |  |
|--------|-----------------------------------------------------|--|--|--|--|
| F43.9  | Reaction to severe stress, unspecified              |  |  |  |  |
| F44.   | Dissociative and conversion disorders               |  |  |  |  |
| F44.0  | Dissociative amnesia                                |  |  |  |  |
| F44.1  | Dissociative fugue                                  |  |  |  |  |
| F44.2  | Dissociative stupor                                 |  |  |  |  |
| F44.4  | Conversion disorder with motor symptom or deficit   |  |  |  |  |
| F44.5  | Conversion disorder with seizures or convulsions    |  |  |  |  |
| F44.6  | Conversion disorder with sensory symptom or deficit |  |  |  |  |
| F44.7  | Conversion disorder with mixed symptom presentation |  |  |  |  |
| F44.8  | Other dissociative and conversion disorders         |  |  |  |  |
| F44.81 | Dissociative identity disorder                      |  |  |  |  |
| F44.89 | Other dissociative and conversion disorders         |  |  |  |  |
| F44.9  | Dissociative and conversion disorder, unspecified   |  |  |  |  |
| F45.0  | Somatization disorder                               |  |  |  |  |
| F45.1  | Undifferentiated somatoform disorder                |  |  |  |  |
| F45.20 | Hypochondriacal disorder, unspecified               |  |  |  |  |
| F45.21 | Hypochondriasis                                     |  |  |  |  |
| F45.22 | Body dysmorphic disorder                            |  |  |  |  |
| F45.29 | Other hypochondriacal disorders                     |  |  |  |  |
| F45.8  | Other somatoform disorders                          |  |  |  |  |
| F45.9  | Somatoform disorder, unspecified                    |  |  |  |  |
| F48.1  | Depersonalization-derealization syndrome            |  |  |  |  |
| F50.   | Eating disorders                                    |  |  |  |  |
| F50.0  | Anorexia nervosa                                    |  |  |  |  |
| F50.00 | Anorexia nervosa, unspecified                       |  |  |  |  |
| F50.01 | Anorexia nervosa, restricting type                  |  |  |  |  |
| F50.02 | Anorexia nervosa, binge eating/purging type         |  |  |  |  |
| F50.2  | Bulimia nervosa                                     |  |  |  |  |
| F50.8  | Other Eating Disorders                              |  |  |  |  |
| F50.81 | Binge eating disorder                               |  |  |  |  |
| F50.82 | Avoidant/restrictive food intake disorder           |  |  |  |  |
| F50.89 | Other specified eating disorder                     |  |  |  |  |
| F50.9  | Eating disorder, unspecified                        |  |  |  |  |
| F53.0  | Postpartum depression                               |  |  |  |  |
| F60.   | Specific personality disorders                      |  |  |  |  |
| F60.0  | Paranoid personality disorder                       |  |  |  |  |
| F60.1  | Schizoid personality disorder                       |  |  |  |  |
| F60.2  | Antisocial personality disorder                     |  |  |  |  |
| F60.3  | Borderline personality disorder                     |  |  |  |  |

|        |                                                                                                  |  |  |  |  |
|--------|--------------------------------------------------------------------------------------------------|--|--|--|--|
| F60.4  | Histrionic personality disorder                                                                  |  |  |  |  |
| F60.5  | Obsessive-compulsive personality disorder                                                        |  |  |  |  |
| F60.6  | Avoidant personality disorder                                                                    |  |  |  |  |
| F60.7  | Dependent personality disorder                                                                   |  |  |  |  |
| F60.8  | Other specific personality disorders                                                             |  |  |  |  |
| F60.81 | Narcissistic personality disorder                                                                |  |  |  |  |
| F60.89 | Other specific personality disorders                                                             |  |  |  |  |
| F60.9  | Personality disorder, unspecified                                                                |  |  |  |  |
| F63.   | Impulse disorders                                                                                |  |  |  |  |
| F63.0  | Pathological gambling                                                                            |  |  |  |  |
| F63.1  | Pyromania                                                                                        |  |  |  |  |
| F63.2  | Kleptomania                                                                                      |  |  |  |  |
| F63.3  | Trichotillomania                                                                                 |  |  |  |  |
| F63.8  | Other impulse disorders                                                                          |  |  |  |  |
| F63.81 | Intermittent explosive disorder                                                                  |  |  |  |  |
| F63.89 | Other impulse disorders                                                                          |  |  |  |  |
| F63.9  | Impulse disorder, unspecified                                                                    |  |  |  |  |
| F68.1  | Factitious disorder                                                                              |  |  |  |  |
| F68.10 | Factitious disorder imposed on self, unspecified                                                 |  |  |  |  |
| F68.11 | Factitious disorder imposed on self, with predominantly psychological signs and symptoms         |  |  |  |  |
| F68.12 | Factitious disorder imposed on self, with predominantly physical signs and symptoms              |  |  |  |  |
| F68.13 | Factitious disorder imposed on self, with combined psychological and physical signs and symptoms |  |  |  |  |
| F68.8  | Other specified disorders of adult personality and behavior                                      |  |  |  |  |
| F69.   | Unspecified disorder of adult personality and behavior                                           |  |  |  |  |
| F90.   | Attention-deficit hyperactivity disorders                                                        |  |  |  |  |
| F90.0  | Attention-deficit hyperactivity disorder, predominantly inattentive type                         |  |  |  |  |
| F90.1  | Attention-deficit hyperactivity disorder, predominantly hyperactive type                         |  |  |  |  |
| F90.2  | Attention-deficit hyperactivity disorder, combined type                                          |  |  |  |  |
| F90.8  | Attention-deficit hyperactivity disorder, other type                                             |  |  |  |  |
| F90.9  | Attention-deficit hyperactivity disorder, unspecified type                                       |  |  |  |  |
| F91.   | Conduct disorders                                                                                |  |  |  |  |
| F91.0  | Conduct disorder confined to family context                                                      |  |  |  |  |

|       |                                                  |  |  |  |  |
|-------|--------------------------------------------------|--|--|--|--|
| F91.1 | Conduct disorder, childhood-onset type           |  |  |  |  |
| F91.2 | Conduct disorder, adolescent-onset type          |  |  |  |  |
| F91.3 | Oppositional defiant disorder                    |  |  |  |  |
| F91.8 | Other conduct disorders                          |  |  |  |  |
| F91.9 | Conduct disorder, unspecified                    |  |  |  |  |
| R45.7 | State of emotional shock and stress, unspecified |  |  |  |  |

eTable 8: ICD-10 codes used for identifying suicide-related ED visits

| ICD-10 Code | ICD-10 Code Description                                                                                    |
|-------------|------------------------------------------------------------------------------------------------------------|
| T36.0X2A    | Poisoning by penicillins, intentional self-harm, initial encounter                                         |
| T36.0X2D    | Poisoning by penicillins, intentional self-harm, subsequent encounter                                      |
| T36.0X2S    | Poisoning by penicillins, intentional self-harm, sequela                                                   |
| T36.1X2A    | Poisoning by cephalosporins and other beta-lactam antibiotics, intentional self-harm, initial encounter    |
| T36.1X2D    | Poisoning by cephalosporins and other beta-lactam antibiotics, intentional self-harm, subsequent encounter |
| T36.1X2S    | Poisoning by cephalosporins and other beta-lactam antibiotics, intentional self-harm, sequela              |
| T36.2X2A    | Poisoning by chloramphenicol group, intentional self-harm, initial encounter                               |
| T36.2X2D    | Poisoning by chloramphenicol group, intentional self-harm, subsequent encounter                            |
| T36.2X2S    | Poisoning by chloramphenicol group, intentional self-harm, sequela                                         |
| T36.3X2A    | Poisoning by macrolides, intentional self-harm, initial encounter                                          |
| T36.3X2D    | Poisoning by macrolides, intentional self-harm, subsequent encounter                                       |
| T36.3X2S    | Poisoning by macrolides, intentional self-harm, sequela                                                    |
| T36.4X2A    | Poisoning by tetracyclines, intentional self-harm, initial encounter                                       |
| T36.4X2D    | Poisoning by tetracyclines, intentional self-harm, subsequent encounter                                    |
| T36.4X2S    | Poisoning by tetracyclines, intentional self-harm, sequela                                                 |
| T36.5X2A    | Poisoning by aminoglycosides, intentional self-harm, initial encounter                                     |
| T36.5X2D    | Poisoning by aminoglycosides, intentional self-harm, subsequent encounter                                  |
| T36.5X2S    | Poisoning by aminoglycosides, intentional self-harm, sequela                                               |
| T36.6X2A    | Poisoning by rifampicins, intentional self-harm, initial encounter                                         |
| T36.6X2D    | Poisoning by rifampicins, intentional self-harm, subsequent encounter                                      |
| T36.6X2S    | Poisoning by rifampicins, intentional self-harm, sequela                                                   |
| T36.7X2A    | Poisoning by antifungal antibiotics, systemically used, intentional self-harm, initial encounter           |
| T36.7X2D    | Poisoning by antifungal antibiotics, systemically used, intentional self-harm, subsequent encounter        |
| T36.7X2S    | Poisoning by antifungal antibiotics, systemically used, intentional self-harm, sequela                     |
| T36.8X2A    | Poisoning by other systemic antibiotics, intentional self-harm, initial encounter                          |
| T36.8X2D    | Poisoning by other systemic antibiotics, intentional self-harm, subsequent encounter                       |
| T36.8X2S    | Poisoning by other systemic antibiotics, intentional self-harm, sequela                                    |

|          |                                                                                                                       |
|----------|-----------------------------------------------------------------------------------------------------------------------|
| T36.92XA | Poisoning by unspecified systemic antibiotic, intentional self-harm, initial encounter                                |
| T36.92XD | Poisoning by unspecified systemic antibiotic, intentional self-harm, subsequent encounter                             |
| T36.92XS | Poisoning by unspecified systemic antibiotic, intentional self-harm, sequela                                          |
| T37.0X2A | Poisoning by sulfonamides, intentional self-harm, initial encounter                                                   |
| T37.0X2D | Poisoning by sulfonamides, intentional self-harm, subsequent encounter                                                |
| T37.0X2S | Poisoning by sulfonamides, intentional self-harm, sequela                                                             |
| T37.1X2A | Poisoning by antimycobacterial drugs, intentional self-harm, initial encounter                                        |
| T37.1X2D | Poisoning by antimycobacterial drugs, intentional self-harm, subsequent encounter                                     |
| T37.1X2S | Poisoning by antimycobacterial drugs, intentional self-harm, sequela                                                  |
| T37.2X2A | Poisoning by antimalarials and drugs acting on other blood protozoa, intentional self-harm, initial encounter         |
| T37.2X2D | Poisoning by antimalarials and drugs acting on other blood protozoa, intentional self-harm, subsequent encounter      |
| T37.2X2S | Poisoning by antimalarials and drugs acting on other blood protozoa, intentional self-harm, sequela                   |
| T37.3X2A | Poisoning by other antiprotozoal drugs, intentional self-harm, initial encounter                                      |
| T37.3X2D | Poisoning by other antiprotozoal drugs, intentional self-harm, subsequent encounter                                   |
| T37.3X2S | Poisoning by other antiprotozoal drugs, intentional self-harm, sequela                                                |
| T37.4X2A | Poisoning by anthelmintics, intentional self-harm, initial encounter                                                  |
| T37.4X2D | Poisoning by anthelmintics, intentional self-harm, subsequent encounter                                               |
| T37.4X2S | Poisoning by anthelmintics, intentional self-harm, sequela                                                            |
| T37.5X2A | Poisoning by antiviral drugs, intentional self-harm, initial encounter                                                |
| T37.5X2D | Poisoning by antiviral drugs, intentional self-harm, subsequent encounter                                             |
| T37.5X2S | Poisoning by antiviral drugs, intentional self-harm, sequela                                                          |
| T37.8X2A | Poisoning by other specified systemic anti-infectives and antiparasitics, intentional self-harm, initial encounter    |
| T37.8X2D | Poisoning by other specified systemic anti-infectives and antiparasitics, intentional self-harm, subsequent encounter |
| T37.8X2S | Poisoning by other specified systemic anti-infectives and antiparasitics, intentional self-harm, sequela              |
| T37.92XA | Poisoning by unspecified systemic anti-infective and antiparasitics, intentional self-harm, initial encounter         |
| T37.92XD | Poisoning by unspecified systemic anti-infective and antiparasitics, intentional self-harm, subsequent encounter      |
| T37.92XS | Poisoning by unspecified systemic anti-infective and antiparasitics, intentional self-harm, sequela                   |
| T38.0X2A | Poisoning by glucocorticoids and synthetic analogues, intentional self-harm, initial encounter                        |
| T38.0X2D | Poisoning by glucocorticoids and synthetic analogues, intentional self-harm, subsequent encounter                     |
| T38.0X2S | Poisoning by glucocorticoids and synthetic analogues, intentional self-harm, sequela                                  |
| T38.1X2A | Poisoning by thyroid hormones and substitutes, intentional self-harm, initial encounter                               |
| T38.1X2D | Poisoning by thyroid hormones and substitutes, intentional self-harm, subsequent encounter                            |
| T38.1X2S | Poisoning by thyroid hormones and substitutes, intentional self-harm, sequela                                         |

|          |                                                                                                                                      |
|----------|--------------------------------------------------------------------------------------------------------------------------------------|
| T38.2X2A | Poisoning by antithyroid drugs, intentional self-harm, initial encounter                                                             |
| T38.2X2D | Poisoning by antithyroid drugs, intentional self-harm, subsequent encounter                                                          |
| T38.2X2S | Poisoning by antithyroid drugs, intentional self-harm, sequela                                                                       |
| T38.3X2A | Poisoning by insulin and oral hypoglycemic [antidiabetic] drugs, intentional self-harm, initial encounter                            |
| T38.3X2D | Poisoning by insulin and oral hypoglycemic [antidiabetic] drugs, intentional self-harm, subsequent encounter                         |
| T38.3X2S | Poisoning by insulin and oral hypoglycemic [antidiabetic] drugs, intentional self-harm, sequela                                      |
| T38.4X2A | Poisoning by oral contraceptives, intentional self-harm, initial encounter                                                           |
| T38.4X2D | Poisoning by oral contraceptives, intentional self-harm, subsequent encounter                                                        |
| T38.4X2S | Poisoning by oral contraceptives, intentional self-harm, sequela                                                                     |
| T38.5X2A | Poisoning by other estrogens and progestogens, intentional self-harm, initial encounter                                              |
| T38.5X2D | Poisoning by other estrogens and progestogens, intentional self-harm, subsequent encounter                                           |
| T38.5X2S | Poisoning by other estrogens and progestogens, intentional self-harm, sequela                                                        |
| T38.6X2A | Poisoning by antigonadotrophins, antiestrogens, antiandrogens, not elsewhere classified, intentional self-harm, initial encounter    |
| T38.6X2D | Poisoning by antigonadotrophins, antiestrogens, antiandrogens, not elsewhere classified, intentional self-harm, subsequent encounter |
| T38.6X2S | Poisoning by antigonadotrophins, antiestrogens, antiandrogens, not elsewhere classified, intentional self-harm, sequela              |
| T38.7X2A | Poisoning by androgens and anabolic congeners, intentional self-harm, initial encounter                                              |
| T38.7X2D | Poisoning by androgens and anabolic congeners, intentional self-harm, subsequent encounter                                           |
| T38.7X2S | Poisoning by androgens and anabolic congeners, intentional self-harm, sequela                                                        |
| T38.802A | Poisoning by unspecified hormones and synthetic substitutes, intentional self-harm, initial encounter                                |
| T38.802D | Poisoning by unspecified hormones and synthetic substitutes, intentional self-harm, subsequent encounter                             |
| T38.802S | Poisoning by unspecified hormones and synthetic substitutes, intentional self-harm, sequela                                          |
| T38.812A | Poisoning by anterior pituitary [adenohypophyseal] hormones, intentional self-harm, initial encounter                                |
| T38.812D | Poisoning by anterior pituitary [adenohypophyseal] hormones, intentional self-harm, subsequent encounter                             |
| T38.812S | Poisoning by anterior pituitary [adenohypophyseal] hormones, intentional self-harm, sequela                                          |
| T38.892A | Poisoning by other hormones and synthetic substitutes, intentional self-harm, initial encounter                                      |
| T38.892D | Poisoning by other hormones and synthetic substitutes, intentional self-harm, subsequent encounter                                   |
| T38.892S | Poisoning by other hormones and synthetic substitutes, intentional self-harm, sequela                                                |
| T38.902A | Poisoning by unspecified hormone antagonists, intentional self-harm, initial encounter                                               |
| T38.902D | Poisoning by unspecified hormone antagonists, intentional self-harm, subsequent encounter                                            |

|          |                                                                                                                                 |
|----------|---------------------------------------------------------------------------------------------------------------------------------|
| T38.902S | Poisoning by unspecified hormone antagonists, intentional self-harm, sequela                                                    |
| T38.992A | Poisoning by other hormone antagonists, intentional self-harm, initial encounter                                                |
| T38.992D | Poisoning by other hormone antagonists, intentional self-harm, subsequent encounter                                             |
| T38.992S | Poisoning by other hormone antagonists, intentional self-harm, sequela                                                          |
| T39.012A | Poisoning by aspirin, intentional self-harm, initial encounter                                                                  |
| T39.012D | Poisoning by aspirin, intentional self-harm, subsequent encounter                                                               |
| T39.012S | Poisoning by aspirin, intentional self-harm, sequela                                                                            |
| T39.092A | Poisoning by salicylates, intentional self-harm, initial encounter                                                              |
| T39.092D | Poisoning by salicylates, intentional self-harm, subsequent encounter                                                           |
| T39.092S | Poisoning by salicylates, intentional self-harm, sequela                                                                        |
| T39.1X2A | Poisoning by 4-Aminophenol derivatives, intentional self-harm, initial encounter                                                |
| T39.1X2D | Poisoning by 4-Aminophenol derivatives, intentional self-harm, subsequent encounter                                             |
| T39.1X2S | Poisoning by 4-Aminophenol derivatives, intentional self-harm, sequela                                                          |
| T39.2X2A | Poisoning by pyrazolone derivatives, intentional self-harm, initial encounter                                                   |
| T39.2X2D | Poisoning by pyrazolone derivatives, intentional self-harm, subsequent encounter                                                |
| T39.2X2S | Poisoning by pyrazolone derivatives, intentional self-harm, sequela                                                             |
| T39.312A | Poisoning by propionic acid derivatives, intentional self-harm, initial encounter                                               |
| T39.312D | Poisoning by propionic acid derivatives, intentional self-harm, subsequent encounter                                            |
| T39.312S | Poisoning by propionic acid derivatives, intentional self-harm, sequela                                                         |
| T39.392A | Poisoning by other nonsteroidal anti-inflammatory drugs [NSAID], intentional self-harm, initial encounter                       |
| T39.392D | Poisoning by other nonsteroidal anti-inflammatory drugs [NSAID], intentional self-harm, subsequent encounter                    |
| T39.392S | Poisoning by other nonsteroidal anti-inflammatory drugs [NSAID], intentional self-harm, sequela                                 |
| T39.4X2A | Poisoning by antirheumatics, not elsewhere classified, intentional self-harm, initial encounter                                 |
| T39.4X2D | Poisoning by antirheumatics, not elsewhere classified, intentional self-harm, subsequent encounter                              |
| T39.4X2S | Poisoning by antirheumatics, not elsewhere classified, intentional self-harm, sequela                                           |
| T39.8X2A | Poisoning by other nonopioid analgesics and antipyretics, not elsewhere classified, intentional self-harm, initial encounter    |
| T39.8X2D | Poisoning by other nonopioid analgesics and antipyretics, not elsewhere classified, intentional self-harm, subsequent encounter |
| T39.8X2S | Poisoning by other nonopioid analgesics and antipyretics, not elsewhere classified, intentional self-harm, sequela              |
| T39.92XA | Poisoning by unspecified nonopioid analgesic, antipyretic and antirheumatic, intentional self-harm, initial encounter           |
| T39.92XD | Poisoning by unspecified nonopioid analgesic, antipyretic and antirheumatic, intentional self-harm, subsequent encounter        |
| T39.92XS | Poisoning by unspecified nonopioid analgesic, antipyretic and antirheumatic, intentional self-harm, sequela                     |
| T40.0X2A | Poisoning by opium, intentional self-harm, initial encounter                                                                    |
| T40.0X2D | Poisoning by opium, intentional self-harm, subsequent encounter                                                                 |
| T40.0X2S | Poisoning by opium, intentional self-harm, sequela                                                                              |

|          |                                                                                                        |
|----------|--------------------------------------------------------------------------------------------------------|
| T40.1X2A | Poisoning by heroin, intentional self-harm, initial encounter                                          |
| T40.1X2D | Poisoning by heroin, intentional self-harm, subsequent encounter                                       |
| T40.1X2S | Poisoning by heroin, intentional self-harm, sequela                                                    |
| T40.2X2A | Poisoning by other opioids, intentional self-harm, initial encounter                                   |
| T40.2X2D | Poisoning by other opioids, intentional self-harm, subsequent encounter                                |
| T40.2X2S | Poisoning by other opioids, intentional self-harm, sequela                                             |
| T40.3X2A | Poisoning by methadone, intentional self-harm, initial encounter                                       |
| T40.3X2D | Poisoning by methadone, intentional self-harm, subsequent encounter                                    |
| T40.3X2S | Poisoning by methadone, intentional self-harm, sequela                                                 |
| T40.412A | Poisoning by fentanyl or fentanyl analogs, intentional self-harm, initial encounter                    |
| T40.412D | Poisoning by fentanyl or fentanyl analogs, intentional self-harm, subsequent encounter                 |
| T40.412S | Poisoning by fentanyl or fentanyl analogs, intentional self-harm, sequela                              |
| T40.422A | Poisoning by tramadol, intentional self-harm, initial encounter                                        |
| T40.422D | Poisoning by tramadol, intentional self-harm, subsequent encounter                                     |
| T40.422S | Poisoning by tramadol, intentional self-harm, sequela                                                  |
| T40.492A | Poisoning by other synthetic narcotics, intentional self-harm, initial encounter                       |
| T40.492D | Poisoning by other synthetic narcotics, intentional self-harm, subsequent encounter                    |
| T40.492S | Poisoning by other synthetic narcotics, intentional self-harm, sequela                                 |
| T40.4X2A | Poisoning by other synthetic narcotics, intentional self-harm, initial encounter                       |
| T40.4X2D | Poisoning by other synthetic narcotics, intentional self-harm, subsequent encounter                    |
| T40.4X2S | Poisoning by other synthetic narcotics, intentional self-harm, sequela                                 |
| T40.5X2A | Poisoning by cocaine, intentional self-harm, initial encounter                                         |
| T40.5X2D | Poisoning by cocaine, intentional self-harm, subsequent encounter                                      |
| T40.5X2S | Poisoning by cocaine, intentional self-harm, sequela                                                   |
| T40.602A | Poisoning by unspecified narcotics, intentional self-harm, initial encounter                           |
| T40.602D | Poisoning by unspecified narcotics, intentional self-harm, subsequent encounter                        |
| T40.602S | Poisoning by unspecified narcotics, intentional self-harm, sequela                                     |
| T40.692A | Poisoning by other narcotics, intentional self-harm, initial encounter                                 |
| T40.692D | Poisoning by other narcotics, intentional self-harm, subsequent encounter                              |
| T40.692S | Poisoning by other narcotics, intentional self-harm, sequela                                           |
| T40.7X2A | Poisoning by cannabis (derivatives), intentional self-harm, initial encounter                          |
| T40.7X2D | Poisoning by cannabis (derivatives), intentional self-harm, subsequent encounter                       |
| T40.7X2S | Poisoning by cannabis (derivatives), intentional self-harm, sequela                                    |
| T40.8X2A | Poisoning by lysergide [LSD], intentional self-harm, initial encounter                                 |
| T40.8X2D | Poisoning by lysergide [LSD], intentional self-harm, subsequent encounter                              |
| T40.8X2S | Poisoning by lysergide [LSD], intentional self-harm, sequela                                           |
| T40.902A | Poisoning by unspecified psychodysleptics [hallucinogens], intentional self-harm, initial encounter    |
| T40.902D | Poisoning by unspecified psychodysleptics [hallucinogens], intentional self-harm, subsequent encounter |
| T40.902S | Poisoning by unspecified psychodysleptics [hallucinogens], intentional self-harm, sequela              |
| T40.992A | Poisoning by other psychodysleptics [hallucinogens], intentional self-harm, initial encounter          |



|          |                                                                                                  |
|----------|--------------------------------------------------------------------------------------------------|
| T40.992D | Poisoning by other psychodysleptics [hallucinogens], intentional self-harm, subsequent encounter |
| T40.992S | Poisoning by other psychodysleptics [hallucinogens], intentional self-harm, sequela              |
| T41.0X2A | Poisoning by inhaled anesthetics, intentional self-harm, initial encounter                       |
| T41.0X2D | Poisoning by inhaled anesthetics, intentional self-harm, subsequent encounter                    |
| T41.0X2S | Poisoning by inhaled anesthetics, intentional self-harm, sequela                                 |
| T41.1X2A | Poisoning by intravenous anesthetics, intentional self-harm, initial encounter                   |
| T41.1X2D | Poisoning by intravenous anesthetics, intentional self-harm, subsequent encounter                |
| T41.1X2S | Poisoning by intravenous anesthetics, intentional self-harm, sequela                             |
| T41.202A | Poisoning by unspecified general anesthetics, intentional self-harm, initial encounter           |
| T41.202D | Poisoning by unspecified general anesthetics, intentional self-harm, subsequent encounter        |
| T41.202S | Poisoning by unspecified general anesthetics, intentional self-harm, sequela                     |
| T41.292A | Poisoning by other general anesthetics, intentional self-harm, initial encounter                 |
| T41.292D | Poisoning by other general anesthetics, intentional self-harm, subsequent encounter              |
| T41.292S | Poisoning by other general anesthetics, intentional self-harm, sequela                           |
| T41.3X2A | Poisoning by local anesthetics, intentional self-harm, initial encounter                         |
| T41.3X2D | Poisoning by local anesthetics, intentional self-harm, subsequent encounter                      |
| T41.3X2S | Poisoning by local anesthetics, intentional self-harm, sequela                                   |
| T41.42XA | Poisoning by unspecified anesthetic, intentional self-harm, initial encounter                    |
| T41.42XD | Poisoning by unspecified anesthetic, intentional self-harm, subsequent encounter                 |
| T41.42XS | Poisoning by unspecified anesthetic, intentional self-harm, sequela                              |
| T41.5X2A | Poisoning by therapeutic gases, intentional self-harm, initial encounter                         |
| T41.5X2D | Poisoning by therapeutic gases, intentional self-harm, subsequent encounter                      |
| T41.5X2S | Poisoning by therapeutic gases, intentional self-harm, sequela                                   |
| T42.0X2A | Poisoning by hydantoin derivatives, intentional self-harm, initial encounter                     |
| T42.0X2D | Poisoning by hydantoin derivatives, intentional self-harm, subsequent encounter                  |
| T42.0X2S | Poisoning by hydantoin derivatives, intentional self-harm, sequela                               |
| T42.1X2A | Poisoning by iminostilbenes, intentional self-harm, initial encounter                            |
| T42.1X2D | Poisoning by iminostilbenes, intentional self-harm, subsequent encounter                         |
| T42.1X2S | Poisoning by iminostilbenes, intentional self-harm, sequela                                      |
| T42.2X2A | Poisoning by succinimides and oxazolidinediones, intentional self-harm, initial encounter        |
| T42.2X2D | Poisoning by succinimides and oxazolidinediones, intentional self-harm, subsequent encounter     |
| T42.2X2S | Poisoning by succinimides and oxazolidinediones, intentional self-harm, sequela                  |
| T42.3X2A | Poisoning by barbiturates, intentional self-harm, initial encounter                              |
| T42.3X2D | Poisoning by barbiturates, intentional self-harm, subsequent encounter                           |
| T42.3X2S | Poisoning by barbiturates, intentional self-harm, sequela                                        |
| T42.4X2A | Poisoning by benzodiazepines, intentional self-harm, initial encounter                           |
| T42.4X2D | Poisoning by benzodiazepines, intentional self-harm, subsequent encounter                        |
| T42.4X2S | Poisoning by benzodiazepines, intentional self-harm, sequela                                     |
| T42.5X2A | Poisoning by mixed antiepileptics, intentional self-harm, initial encounter                      |
| T42.5X2D | Poisoning by mixed antiepileptics, intentional self-harm, subsequent encounter                   |
| T42.5X2S | Poisoning by mixed antiepileptics, intentional self-harm, sequela                                |

|          |                                                                                                                            |
|----------|----------------------------------------------------------------------------------------------------------------------------|
| T42.6X2A | Poisoning by other antiepileptic and sedative-hypnotic drugs, intentional self-harm, initial encounter                     |
| T42.6X2D | Poisoning by other antiepileptic and sedative-hypnotic drugs, intentional self-harm, subsequent encounter                  |
| T42.6X2S | Poisoning by other antiepileptic and sedative-hypnotic drugs, intentional self-harm, sequela                               |
| T42.72XA | Poisoning by unspecified antiepileptic and sedative-hypnotic drugs, intentional self-harm, initial encounter               |
| T42.72XD | Poisoning by unspecified antiepileptic and sedative-hypnotic drugs, intentional self-harm, subsequent encounter            |
| T42.72XS | Poisoning by unspecified antiepileptic and sedative-hypnotic drugs, intentional self-harm, sequela                         |
| T42.8X2A | Poisoning by antiparkinsonism drugs and other central muscle-tone depressants, intentional self-harm, initial encounter    |
| T42.8X2D | Poisoning by antiparkinsonism drugs and other central muscle-tone depressants, intentional self-harm, subsequent encounter |
| T42.8X2S | Poisoning by antiparkinsonism drugs and other central muscle-tone depressants, intentional self-harm, sequela              |
| T43.012A | Poisoning by tricyclic antidepressants, intentional self-harm, initial encounter                                           |
| T43.012D | Poisoning by tricyclic antidepressants, intentional self-harm, subsequent encounter                                        |
| T43.012S | Poisoning by tricyclic antidepressants, intentional self-harm, sequela                                                     |
| T43.022A | Poisoning by tetracyclic antidepressants, intentional self-harm, initial encounter                                         |
| T43.022D | Poisoning by tetracyclic antidepressants, intentional self-harm, subsequent encounter                                      |
| T43.022S | Poisoning by tetracyclic antidepressants, intentional self-harm, sequela                                                   |
| T43.1X2A | Poisoning by monoamine-oxidase-inhibitor antidepressants, intentional self-harm, initial encounter                         |
| T43.1X2D | Poisoning by monoamine-oxidase-inhibitor antidepressants, intentional self-harm, subsequent encounter                      |
| T43.1X2S | Poisoning by monoamine-oxidase-inhibitor antidepressants, intentional self-harm, sequela                                   |
| T43.202A | Poisoning by unspecified antidepressants, intentional self-harm, initial encounter                                         |
| T43.202D | Poisoning by unspecified antidepressants, intentional self-harm, subsequent encounter                                      |
| T43.202S | Poisoning by unspecified antidepressants, intentional self-harm, sequela                                                   |
| T43.212A | Poisoning by selective serotonin and norepinephrine reuptake inhibitors, intentional self-harm, initial encounter          |
| T43.212D | Poisoning by selective serotonin and norepinephrine reuptake inhibitors, intentional self-harm, subsequent encounter       |
| T43.212S | Poisoning by selective serotonin and norepinephrine reuptake inhibitors, intentional self-harm, sequela                    |
| T43.222A | Poisoning by selective serotonin reuptake inhibitors, intentional self-harm, initial encounter                             |
| T43.222D | Poisoning by selective serotonin reuptake inhibitors, intentional self-harm, subsequent encounter                          |
| T43.222S | Poisoning by selective serotonin reuptake inhibitors, intentional self-harm, sequela                                       |
| T43.292A | Poisoning by other antidepressants, intentional self-harm, initial encounter                                               |
| T43.292D | Poisoning by other antidepressants, intentional self-harm, subsequent encounter                                            |

|          |                                                                                                         |
|----------|---------------------------------------------------------------------------------------------------------|
| T43.292S | Poisoning by other antidepressants, intentional self-harm, sequela                                      |
| T43.3X2A | Poisoning by phenothiazine antipsychotics and neuroleptics, intentional self-harm, initial encounter    |
| T43.3X2D | Poisoning by phenothiazine antipsychotics and neuroleptics, intentional self-harm, subsequent encounter |
| T43.3X2S | Poisoning by phenothiazine antipsychotics and neuroleptics, intentional self-harm, sequela              |
| T43.4X2A | Poisoning by butyrophenone and thiothixene neuroleptics, intentional self-harm, initial encounter       |
| T43.4X2D | Poisoning by butyrophenone and thiothixene neuroleptics, intentional self-harm, subsequent encounter    |
| T43.4X2S | Poisoning by butyrophenone and thiothixene neuroleptics, intentional self-harm, sequela                 |
| T43.502A | Poisoning by unspecified antipsychotics and neuroleptics, intentional self-harm, initial encounter      |
| T43.502D | Poisoning by unspecified antipsychotics and neuroleptics, intentional self-harm, subsequent encounter   |
| T43.502S | Poisoning by unspecified antipsychotics and neuroleptics, intentional self-harm, sequela                |
| T43.592A | Poisoning by other antipsychotics and neuroleptics, intentional self-harm, initial encounter            |
| T43.592D | Poisoning by other antipsychotics and neuroleptics, intentional self-harm, subsequent encounter         |
| T43.592S | Poisoning by other antipsychotics and neuroleptics, intentional self-harm, sequela                      |
| T43.602A | Poisoning by unspecified psychostimulants, intentional self-harm, initial encounter                     |
| T43.602D | Poisoning by unspecified psychostimulants, intentional self-harm, subsequent encounter                  |
| T43.602S | Poisoning by unspecified psychostimulants, intentional self-harm, sequela                               |
| T43.612A | Poisoning by caffeine, intentional self-harm, initial encounter                                         |
| T43.612D | Poisoning by caffeine, intentional self-harm, subsequent encounter                                      |
| T43.612S | Poisoning by caffeine, intentional self-harm, sequela                                                   |
| T43.622A | Poisoning by amphetamines, intentional self-harm, initial encounter                                     |
| T43.622D | Poisoning by amphetamines, intentional self-harm, subsequent encounter                                  |
| T43.622S | Poisoning by amphetamines, intentional self-harm, sequela                                               |
| T43.632A | Poisoning by methylphenidate, intentional self-harm, initial encounter                                  |
| T43.632D | Poisoning by methylphenidate, intentional self-harm, subsequent encounter                               |
| T43.632S | Poisoning by methylphenidate, intentional self-harm, sequela                                            |
| T43.642A | Poisoning by ecstasy, intentional self-harm, initial encounter                                          |
| T43.642D | Poisoning by ecstasy, intentional self-harm, subsequent encounter                                       |
| T43.642S | Poisoning by ecstasy, intentional self-harm, sequela                                                    |
| T43.692A | Poisoning by other psychostimulants, intentional self-harm, initial encounter                           |
| T43.692D | Poisoning by other psychostimulants, intentional self-harm, subsequent encounter                        |
| T43.692S | Poisoning by other psychostimulants, intentional self-harm, sequela                                     |
| T43.8X2A | Poisoning by other psychotropic drugs, intentional self-harm, initial encounter                         |
| T43.8X2D | Poisoning by other psychotropic drugs, intentional self-harm, subsequent encounter                      |
| T43.8X2S | Poisoning by other psychotropic drugs, intentional self-harm, sequela                                   |
| T43.92XA | Poisoning by unspecified psychotropic drug, intentional self-harm, initial encounter                    |
| T43.92XD | Poisoning by unspecified psychotropic drug, intentional self-harm, subsequent encounter                 |
| T43.92XS | Poisoning by unspecified psychotropic drug, intentional self-harm, sequela                              |

|          |                                                                                                                                            |
|----------|--------------------------------------------------------------------------------------------------------------------------------------------|
| T44.0X2A | Poisoning by anticholinesterase agents, intentional self-harm, initial encounter                                                           |
| T44.0X2D | Poisoning by anticholinesterase agents, intentional self-harm, subsequent encounter                                                        |
| T44.0X2S | Poisoning by anticholinesterase agents, intentional self-harm, sequela                                                                     |
| T44.1X2A | Poisoning by other parasympathomimetics [cholinergics], intentional self-harm, initial encounter                                           |
| T44.1X2D | Poisoning by other parasympathomimetics [cholinergics], intentional self-harm, subsequent encounter                                        |
| T44.1X2S | Poisoning by other parasympathomimetics [cholinergics], intentional self-harm, sequela                                                     |
| T44.2X2A | Poisoning by ganglionic blocking drugs, intentional self-harm, initial encounter                                                           |
| T44.2X2D | Poisoning by ganglionic blocking drugs, intentional self-harm, subsequent encounter                                                        |
| T44.2X2S | Poisoning by ganglionic blocking drugs, intentional self-harm, sequela                                                                     |
| T44.3X2A | Poisoning by other parasympatholytics [anticholinergics and antimuscarinics] and spasmolytics, intentional self-harm, initial encounter    |
| T44.3X2D | Poisoning by other parasympatholytics [anticholinergics and antimuscarinics] and spasmolytics, intentional self-harm, subsequent encounter |
| T44.3X2S | Poisoning by other parasympatholytics [anticholinergics and antimuscarinics] and spasmolytics, intentional self-harm, sequela              |
| T44.4X2A | Poisoning by predominantly alpha-adrenoreceptor agonists, intentional self-harm, initial encounter                                         |
| T44.4X2D | Poisoning by predominantly alpha-adrenoreceptor agonists, intentional self-harm, subsequent encounter                                      |
| T44.4X2S | Poisoning by predominantly alpha-adrenoreceptor agonists, intentional self-harm, sequela                                                   |
| T44.5X2A | Poisoning by predominantly beta-adrenoreceptor agonists, intentional self-harm, initial encounter                                          |
| T44.5X2D | Poisoning by predominantly beta-adrenoreceptor agonists, intentional self-harm, subsequent encounter                                       |
| T44.5X2S | Poisoning by predominantly beta-adrenoreceptor agonists, intentional self-harm, sequela                                                    |
| T44.6X2A | Poisoning by alpha-adrenoreceptor antagonists, intentional self-harm, initial encounter                                                    |
| T44.6X2D | Poisoning by alpha-adrenoreceptor antagonists, intentional self-harm, subsequent encounter                                                 |
| T44.6X2S | Poisoning by alpha-adrenoreceptor antagonists, intentional self-harm, sequela                                                              |
| T44.7X2A | Poisoning by beta-adrenoreceptor antagonists, intentional self-harm, initial encounter                                                     |
| T44.7X2D | Poisoning by beta-adrenoreceptor antagonists, intentional self-harm, subsequent encounter                                                  |
| T44.7X2S | Poisoning by beta-adrenoreceptor antagonists, intentional self-harm, sequela                                                               |
| T44.8X2A | Poisoning by centrally-acting and adrenergic-neuron-blocking agents, intentional self-harm, initial encounter                              |
| T44.8X2D | Poisoning by centrally-acting and adrenergic-neuron-blocking agents, intentional self-harm, subsequent encounter                           |
| T44.8X2S | Poisoning by centrally-acting and adrenergic-neuron-blocking agents, intentional self-harm, sequela                                        |
| T44.902A | Poisoning by unspecified drugs primarily affecting the autonomic nervous system, intentional self-harm, initial encounter                  |
| T44.902D | Poisoning by unspecified drugs primarily affecting the autonomic nervous system, intentional self-harm, subsequent encounter               |

|          |                                                                                                                       |
|----------|-----------------------------------------------------------------------------------------------------------------------|
| T44.902S | Poisoning by unspecified drugs primarily affecting the autonomic nervous system, intentional self-harm, sequela       |
| T44.992A | Poisoning by other drug primarily affecting the autonomic nervous system, intentional self-harm, initial encounter    |
| T44.992D | Poisoning by other drug primarily affecting the autonomic nervous system, intentional self-harm, subsequent encounter |
| T44.992S | Poisoning by other drug primarily affecting the autonomic nervous system, intentional self-harm, sequela              |
| T45.0X2A | Poisoning by antiallergic and antiemetic drugs, intentional self-harm, initial encounter                              |
| T45.0X2D | Poisoning by antiallergic and antiemetic drugs, intentional self-harm, subsequent encounter                           |
| T45.0X2S | Poisoning by antiallergic and antiemetic drugs, intentional self-harm, sequela                                        |
| T45.1X2A | Poisoning by antineoplastic and immunosuppressive drugs, intentional self-harm, initial encounter                     |
| T45.1X2D | Poisoning by antineoplastic and immunosuppressive drugs, intentional self-harm, subsequent encounter                  |
| T45.1X2S | Poisoning by antineoplastic and immunosuppressive drugs, intentional self-harm, sequela                               |
| T45.2X2A | Poisoning by vitamins, intentional self-harm, initial encounter                                                       |
| T45.2X2D | Poisoning by vitamins, intentional self-harm, subsequent encounter                                                    |
| T45.2X2S | Poisoning by vitamins, intentional self-harm, sequela                                                                 |
| T45.3X2A | Poisoning by enzymes, intentional self-harm, initial encounter                                                        |
| T45.3X2D | Poisoning by enzymes, intentional self-harm, subsequent encounter                                                     |
| T45.3X2S | Poisoning by enzymes, intentional self-harm, sequela                                                                  |
| T45.4X2A | Poisoning by iron and its compounds, intentional self-harm, initial encounter                                         |
| T45.4X2D | Poisoning by iron and its compounds, intentional self-harm, subsequent encounter                                      |
| T45.4X2S | Poisoning by iron and its compounds, intentional self-harm, sequela                                                   |
| T45.512A | Poisoning by anticoagulants, intentional self-harm, initial encounter                                                 |
| T45.512D | Poisoning by anticoagulants, intentional self-harm, subsequent encounter                                              |
| T45.512S | Poisoning by anticoagulants, intentional self-harm, sequela                                                           |
| T45.522A | Poisoning by antithrombotic drugs, intentional self-harm, initial encounter                                           |
| T45.522D | Poisoning by antithrombotic drugs, intentional self-harm, subsequent encounter                                        |
| T45.522S | Poisoning by antithrombotic drugs, intentional self-harm, sequela                                                     |
| T45.602A | Poisoning by unspecified fibrinolysis-affecting drugs, intentional self-harm, initial encounter                       |
| T45.602D | Poisoning by unspecified fibrinolysis-affecting drugs, intentional self-harm, subsequent encounter                    |
| T45.602S | Poisoning by unspecified fibrinolysis-affecting drugs, intentional self-harm, sequela                                 |
| T45.612A | Poisoning by thrombolytic drug, intentional self-harm, initial encounter                                              |
| T45.612D | Poisoning by thrombolytic drug, intentional self-harm, subsequent encounter                                           |
| T45.612S | Poisoning by thrombolytic drug, intentional self-harm, sequela                                                        |
| T45.622A | Poisoning by hemostatic drug, intentional self-harm, initial encounter                                                |
| T45.622D | Poisoning by hemostatic drug, intentional self-harm, subsequent encounter                                             |
| T45.622S | Poisoning by hemostatic drug, intentional self-harm, sequela                                                          |
| T45.692A | Poisoning by other fibrinolysis-affecting drugs, intentional self-harm, initial encounter                             |

|          |                                                                                                                     |
|----------|---------------------------------------------------------------------------------------------------------------------|
| T45.692D | Poisoning by other fibrinolysis-affecting drugs, intentional self-harm, subsequent encounter                        |
| T45.692S | Poisoning by other fibrinolysis-affecting drugs, intentional self-harm, sequela                                     |
| T45.7X2A | Poisoning by anticoagulant antagonists, vitamin K and other coagulants, intentional self-harm, initial encounter    |
| T45.7X2D | Poisoning by anticoagulant antagonists, vitamin K and other coagulants, intentional self-harm, subsequent encounter |
| T45.7X2S | Poisoning by anticoagulant antagonists, vitamin K and other coagulants, intentional self-harm, sequela              |
| T45.8X2A | Poisoning by other primarily systemic and hematological agents, intentional self-harm, initial encounter            |
| T45.8X2D | Poisoning by other primarily systemic and hematological agents, intentional self-harm, subsequent encounter         |
| T45.8X2S | Poisoning by other primarily systemic and hematological agents, intentional self-harm, sequela                      |
| T45.92XA | Poisoning by unspecified primarily systemic and hematological agent, intentional self-harm, initial encounter       |
| T45.92XD | Poisoning by unspecified primarily systemic and hematological agent, intentional self-harm, subsequent encounter    |
| T45.92XS | Poisoning by unspecified primarily systemic and hematological agent, intentional self-harm, sequela                 |
| T46.0X2A | Poisoning by cardiac-stimulant glycosides and drugs of similar action, intentional self-harm, initial encounter     |
| T46.0X2D | Poisoning by cardiac-stimulant glycosides and drugs of similar action, intentional self-harm, subsequent encounter  |
| T46.0X2S | Poisoning by cardiac-stimulant glycosides and drugs of similar action, intentional self-harm, sequela               |
| T46.1X2A | Poisoning by calcium-channel blockers, intentional self-harm, initial encounter                                     |
| T46.1X2D | Poisoning by calcium-channel blockers, intentional self-harm, subsequent encounter                                  |
| T46.1X2S | Poisoning by calcium-channel blockers, intentional self-harm, sequela                                               |
| T46.2X2A | Poisoning by other antidysrhythmic drugs, intentional self-harm, initial encounter                                  |
| T46.2X2D | Poisoning by other antidysrhythmic drugs, intentional self-harm, subsequent encounter                               |
| T46.2X2S | Poisoning by other antidysrhythmic drugs, intentional self-harm, sequela                                            |
| T46.3X2A | Poisoning by coronary vasodilators, intentional self-harm, initial encounter                                        |
| T46.3X2D | Poisoning by coronary vasodilators, intentional self-harm, subsequent encounter                                     |
| T46.3X2S | Poisoning by coronary vasodilators, intentional self-harm, sequela                                                  |
| T46.4X2A | Poisoning by angiotensin-converting-enzyme inhibitors, intentional self-harm, initial encounter                     |
| T46.4X2D | Poisoning by angiotensin-converting-enzyme inhibitors, intentional self-harm, subsequent encounter                  |
| T46.4X2S | Poisoning by angiotensin-converting-enzyme inhibitors, intentional self-harm, sequela                               |
| T46.5X2A | Poisoning by other antihypertensive drugs, intentional self-harm, initial encounter                                 |
| T46.5X2D | Poisoning by other antihypertensive drugs, intentional self-harm, subsequent encounter                              |
| T46.5X2S | Poisoning by other antihypertensive drugs, intentional self-harm, sequela                                           |

|          |                                                                                                                            |
|----------|----------------------------------------------------------------------------------------------------------------------------|
| T46.6X2A | Poisoning by antihyperlipidemic and antiarteriosclerotic drugs, intentional self-harm, initial encounter                   |
| T46.6X2D | Poisoning by antihyperlipidemic and antiarteriosclerotic drugs, intentional self-harm, subsequent encounter                |
| T46.6X2S | Poisoning by antihyperlipidemic and antiarteriosclerotic drugs, intentional self-harm, sequela                             |
| T46.7X2A | Poisoning by peripheral vasodilators, intentional self-harm, initial encounter                                             |
| T46.7X2D | Poisoning by peripheral vasodilators, intentional self-harm, subsequent encounter                                          |
| T46.7X2S | Poisoning by peripheral vasodilators, intentional self-harm, sequela                                                       |
| T46.8X2A | Poisoning by antivaricose drugs, including sclerosing agents, intentional self-harm, initial encounter                     |
| T46.8X2D | Poisoning by antivaricose drugs, including sclerosing agents, intentional self-harm, subsequent encounter                  |
| T46.8X2S | Poisoning by antivaricose drugs, including sclerosing agents, intentional self-harm, sequela                               |
| T46.902A | Poisoning by unspecified agents primarily affecting the cardiovascular system, intentional self-harm, initial encounter    |
| T46.902D | Poisoning by unspecified agents primarily affecting the cardiovascular system, intentional self-harm, subsequent encounter |
| T46.902S | Poisoning by unspecified agents primarily affecting the cardiovascular system, intentional self-harm, sequela              |
| T46.992A | Poisoning by other agents primarily affecting the cardiovascular system, intentional self-harm, initial encounter          |
| T46.992D | Poisoning by other agents primarily affecting the cardiovascular system, intentional self-harm, subsequent encounter       |
| T46.992S | Poisoning by other agents primarily affecting the cardiovascular system, intentional self-harm, sequela                    |
| T47.0X2A | Poisoning by histamine H2-receptor blockers, intentional self-harm, initial encounter                                      |
| T47.0X2D | Poisoning by histamine H2-receptor blockers, intentional self-harm, subsequent encounter                                   |
| T47.0X2S | Poisoning by histamine H2-receptor blockers, intentional self-harm, sequela                                                |
| T47.1X2A | Poisoning by other antacids and anti-gastric-secretion drugs, intentional self-harm, initial encounter                     |
| T47.1X2D | Poisoning by other antacids and anti-gastric-secretion drugs, intentional self-harm, subsequent encounter                  |
| T47.1X2S | Poisoning by other antacids and anti-gastric-secretion drugs, intentional self-harm, sequela                               |
| T47.2X2A | Poisoning by stimulant laxatives, intentional self-harm, initial encounter                                                 |
| T47.2X2D | Poisoning by stimulant laxatives, intentional self-harm, subsequent encounter                                              |
| T47.2X2S | Poisoning by stimulant laxatives, intentional self-harm, sequela                                                           |
| T47.3X2A | Poisoning by saline and osmotic laxatives, intentional self-harm, initial encounter                                        |
| T47.3X2D | Poisoning by saline and osmotic laxatives, intentional self-harm, subsequent encounter                                     |
| T47.3X2S | Poisoning by saline and osmotic laxatives, intentional self-harm, sequela                                                  |
| T47.4X2A | Poisoning by other laxatives, intentional self-harm, initial encounter                                                     |
| T47.4X2D | Poisoning by other laxatives, intentional self-harm, subsequent encounter                                                  |
| T47.4X2S | Poisoning by other laxatives, intentional self-harm, sequela                                                               |
| T47.5X2A | Poisoning by digestants, intentional self-harm, initial encounter                                                          |
| T47.5X2D | Poisoning by digestants, intentional self-harm, subsequent encounter                                                       |

|          |                                                                                                                              |
|----------|------------------------------------------------------------------------------------------------------------------------------|
| T47.5X2S | Poisoning by digestants, intentional self-harm, sequela                                                                      |
| T47.6X2A | Poisoning by antidiarrheal drugs, intentional self-harm, initial encounter                                                   |
| T47.6X2D | Poisoning by antidiarrheal drugs, intentional self-harm, subsequent encounter                                                |
| T47.6X2S | Poisoning by antidiarrheal drugs, intentional self-harm, sequela                                                             |
| T47.7X2A | Poisoning by emetics, intentional self-harm, initial encounter                                                               |
| T47.7X2D | Poisoning by emetics, intentional self-harm, subsequent encounter                                                            |
| T47.7X2S | Poisoning by emetics, intentional self-harm, sequela                                                                         |
| T47.8X2A | Poisoning by other agents primarily affecting gastrointestinal system, intentional self-harm, initial encounter              |
| T47.8X2D | Poisoning by other agents primarily affecting gastrointestinal system, intentional self-harm, subsequent encounter           |
| T47.8X2S | Poisoning by other agents primarily affecting gastrointestinal system, intentional self-harm, sequela                        |
| T47.92XA | Poisoning by unspecified agents primarily affecting the gastrointestinal system, intentional self-harm, initial encounter    |
| T47.92XD | Poisoning by unspecified agents primarily affecting the gastrointestinal system, intentional self-harm, subsequent encounter |
| T47.92XS | Poisoning by unspecified agents primarily affecting the gastrointestinal system, intentional self-harm, sequela              |
| T48.0X2A | Poisoning by oxytocic drugs, intentional self-harm, initial encounter                                                        |
| T48.0X2D | Poisoning by oxytocic drugs, intentional self-harm, subsequent encounter                                                     |
| T48.0X2S | Poisoning by oxytocic drugs, intentional self-harm, sequela                                                                  |
| T48.1X2A | Poisoning by skeletal muscle relaxants [neuromuscular blocking agents], intentional self-harm, initial encounter             |
| T48.1X2D | Poisoning by skeletal muscle relaxants [neuromuscular blocking agents], intentional self-harm, subsequent encounter          |
| T48.1X2S | Poisoning by skeletal muscle relaxants [neuromuscular blocking agents], intentional self-harm, sequela                       |
| T48.202A | Poisoning by unspecified drugs acting on muscles, intentional self-harm, initial encounter                                   |
| T48.202D | Poisoning by unspecified drugs acting on muscles, intentional self-harm, subsequent encounter                                |
| T48.202S | Poisoning by unspecified drugs acting on muscles, intentional self-harm, sequela                                             |
| T48.292A | Poisoning by other drugs acting on muscles, intentional self-harm, initial encounter                                         |
| T48.292D | Poisoning by other drugs acting on muscles, intentional self-harm, subsequent encounter                                      |
| T48.292S | Poisoning by other drugs acting on muscles, intentional self-harm, sequela                                                   |
| T48.3X2A | Poisoning by antitussives, intentional self-harm, initial encounter                                                          |
| T48.3X2D | Poisoning by antitussives, intentional self-harm, subsequent encounter                                                       |
| T48.3X2S | Poisoning by antitussives, intentional self-harm, sequela                                                                    |
| T48.4X2A | Poisoning by expectorants, intentional self-harm, initial encounter                                                          |
| T48.4X2D | Poisoning by expectorants, intentional self-harm, subsequent encounter                                                       |
| T48.4X2S | Poisoning by expectorants, intentional self-harm, sequela                                                                    |
| T48.5X2A | Poisoning by other anti-common-cold drugs, intentional self-harm, initial encounter                                          |
| T48.5X2D | Poisoning by other anti-common-cold drugs, intentional self-harm, subsequent encounter                                       |
| T48.5X2S | Poisoning by other anti-common-cold drugs, intentional self-harm, sequela                                                    |



|          |                                                                                                                                         |
|----------|-----------------------------------------------------------------------------------------------------------------------------------------|
| T48.6X2A | Poisoning by antiasthmatics, intentional self-harm, initial encounter                                                                   |
| T48.6X2D | Poisoning by antiasthmatics, intentional self-harm, subsequent encounter                                                                |
| T48.6X2S | Poisoning by antiasthmatics, intentional self-harm, sequela                                                                             |
| T48.902A | Poisoning by unspecified agents primarily acting on the respiratory system, intentional self-harm, initial encounter                    |
| T48.902D | Poisoning by unspecified agents primarily acting on the respiratory system, intentional self-harm, subsequent encounter                 |
| T48.902S | Poisoning by unspecified agents primarily acting on the respiratory system, intentional self-harm, sequela                              |
| T48.992A | Poisoning by other agents primarily acting on the respiratory system, intentional self-harm, initial encounter                          |
| T48.992D | Poisoning by other agents primarily acting on the respiratory system, intentional self-harm, subsequent encounter                       |
| T48.992S | Poisoning by other agents primarily acting on the respiratory system, intentional self-harm, sequela                                    |
| T49.0X2A | Poisoning by local antifungal, anti-infective and anti-inflammatory drugs, intentional self-harm, initial encounter                     |
| T49.0X2D | Poisoning by local antifungal, anti-infective and anti-inflammatory drugs, intentional self-harm, subsequent encounter                  |
| T49.0X2S | Poisoning by local antifungal, anti-infective and anti-inflammatory drugs, intentional self-harm, sequela                               |
| T49.1X2A | Poisoning by antipruritics, intentional self-harm, initial encounter                                                                    |
| T49.1X2D | Poisoning by antipruritics, intentional self-harm, subsequent encounter                                                                 |
| T49.1X2S | Poisoning by antipruritics, intentional self-harm, sequela                                                                              |
| T49.2X2A | Poisoning by local astringents and local detergents, intentional self-harm, initial encounter                                           |
| T49.2X2D | Poisoning by local astringents and local detergents, intentional self-harm, subsequent encounter                                        |
| T49.2X2S | Poisoning by local astringents and local detergents, intentional self-harm, sequela                                                     |
| T49.3X2A | Poisoning by emollients, demulcents and protectants, intentional self-harm, initial encounter                                           |
| T49.3X2D | Poisoning by emollients, demulcents and protectants, intentional self-harm, subsequent encounter                                        |
| T49.3X2S | Poisoning by emollients, demulcents and protectants, intentional self-harm, sequela                                                     |
| T49.4X2A | Poisoning by keratolytics, keratoplastics, and other hair treatment drugs and preparations, intentional self-harm, initial encounter    |
| T49.4X2D | Poisoning by keratolytics, keratoplastics, and other hair treatment drugs and preparations, intentional self-harm, subsequent encounter |
| T49.4X2S | Poisoning by keratolytics, keratoplastics, and other hair treatment drugs and preparations, intentional self-harm, sequela              |
| T49.5X2A | Poisoning by ophthalmological drugs and preparations, intentional self-harm, initial encounter                                          |
| T49.5X2D | Poisoning by ophthalmological drugs and preparations, intentional self-harm, subsequent encounter                                       |
| T49.5X2S | Poisoning by ophthalmological drugs and preparations, intentional self-harm, sequela                                                    |
| T49.6X2A | Poisoning by otorhinolaryngological drugs and preparations, intentional self-harm, initial encounter                                    |

|          |                                                                                                                                |
|----------|--------------------------------------------------------------------------------------------------------------------------------|
| T49.6X2D | Poisoning by otorhinolaryngological drugs and preparations, intentional self-harm, subsequent encounter                        |
| T49.6X2S | Poisoning by otorhinolaryngological drugs and preparations, intentional self-harm, sequela                                     |
| T49.7X2A | Poisoning by dental drugs, topically applied, intentional self-harm, initial encounter                                         |
| T49.7X2D | Poisoning by dental drugs, topically applied, intentional self-harm, subsequent encounter                                      |
| T49.7X2S | Poisoning by dental drugs, topically applied, intentional self-harm, sequela                                                   |
| T49.8X2A | Poisoning by other topical agents, intentional self-harm, initial encounter                                                    |
| T49.8X2D | Poisoning by other topical agents, intentional self-harm, subsequent encounter                                                 |
| T49.8X2S | Poisoning by other topical agents, intentional self-harm, sequela                                                              |
| T49.92XA | Poisoning by unspecified topical agent, intentional self-harm, initial encounter                                               |
| T49.92XD | Poisoning by unspecified topical agent, intentional self-harm, subsequent encounter                                            |
| T49.92XS | Poisoning by unspecified topical agent, intentional self-harm, sequela                                                         |
| T50.0X2A | Poisoning by mineralocorticoids and their antagonists, intentional self-harm, initial encounter                                |
| T50.0X2D | Poisoning by mineralocorticoids and their antagonists, intentional self-harm, subsequent encounter                             |
| T50.0X2S | Poisoning by mineralocorticoids and their antagonists, intentional self-harm, sequela                                          |
| T50.1X2A | Poisoning by loop [high-ceiling] diuretics, intentional self-harm, initial encounter                                           |
| T50.1X2D | Poisoning by loop [high-ceiling] diuretics, intentional self-harm, subsequent encounter                                        |
| T50.1X2S | Poisoning by loop [high-ceiling] diuretics, intentional self-harm, sequela                                                     |
| T50.2X2A | Poisoning by carbonic-anhydrase inhibitors, benzothiadiazides and other diuretics, intentional self-harm, initial encounter    |
| T50.2X2D | Poisoning by carbonic-anhydrase inhibitors, benzothiadiazides and other diuretics, intentional self-harm, subsequent encounter |
| T50.2X2S | Poisoning by carbonic-anhydrase inhibitors, benzothiadiazides and other diuretics, intentional self-harm, sequela              |
| T50.3X2A | Poisoning by electrolytic, caloric and water-balance agents, intentional self-harm, initial encounter                          |
| T50.3X2D | Poisoning by electrolytic, caloric and water-balance agents, intentional self-harm, subsequent encounter                       |
| T50.3X2S | Poisoning by electrolytic, caloric and water-balance agents, intentional self-harm, sequela                                    |
| T50.4X2A | Poisoning by drugs affecting uric acid metabolism, intentional self-harm, initial encounter                                    |
| T50.4X2D | Poisoning by drugs affecting uric acid metabolism, intentional self-harm, subsequent encounter                                 |
| T50.4X2S | Poisoning by drugs affecting uric acid metabolism, intentional self-harm, sequela                                              |
| T50.5X2A | Poisoning by appetite depressants, intentional self-harm, initial encounter                                                    |
| T50.5X2D | Poisoning by appetite depressants, intentional self-harm, subsequent encounter                                                 |
| T50.5X2S | Poisoning by appetite depressants, intentional self-harm, sequela                                                              |
| T50.6X2A | Poisoning by antidotes and chelating agents, intentional self-harm, initial encounter                                          |
| T50.6X2D | Poisoning by antidotes and chelating agents, intentional self-harm, subsequent encounter                                       |
| T50.6X2S | Poisoning by antidotes and chelating agents, intentional self-harm, sequela                                                    |
| T50.7X2A | Poisoning by analeptics and opioid receptor antagonists, intentional self-harm, initial encounter                              |
| T50.7X2D | Poisoning by analeptics and opioid receptor antagonists, intentional self-harm, subsequent encounter                           |

|          |                                                                                                                                |
|----------|--------------------------------------------------------------------------------------------------------------------------------|
| T50.7X2S | Poisoning by analeptics and opioid receptor antagonists, intentional self-harm, sequela                                        |
| T50.8X2A | Poisoning by diagnostic agents, intentional self-harm, initial encounter                                                       |
| T50.8X2D | Poisoning by diagnostic agents, intentional self-harm, subsequent encounter                                                    |
| T50.8X2S | Poisoning by diagnostic agents, intentional self-harm, sequela                                                                 |
| T50.902A | Poisoning by unspecified drugs, medicaments and biological substances, intentional self-harm, initial encounter                |
| T50.902D | Poisoning by unspecified drugs, medicaments and biological substances, intentional self-harm, subsequent encounter             |
| T50.902S | Poisoning by unspecified drugs, medicaments and biological substances, intentional self-harm, sequela                          |
| T50.912A | Poisoning by multiple unspecified drugs, medicaments and biological substances, intentional self-harm, initial encounter       |
| T50.912D | Poisoning by multiple unspecified drugs, medicaments and biological substances, intentional self-harm, subsequent encounter    |
| T50.912S | Poisoning by multiple unspecified drugs, medicaments and biological substances, intentional self-harm, sequela                 |
| T50.992A | Poisoning by other drugs, medicaments and biological substances, intentional self-harm, initial encounter                      |
| T50.992D | Poisoning by other drugs, medicaments and biological substances, intentional self-harm, subsequent encounter                   |
| T50.992S | Poisoning by other drugs, medicaments and biological substances, intentional self-harm, sequela                                |
| T50.A12A | Poisoning by pertussis vaccine, including combinations with a pertussis component, intentional self-harm, initial encounter    |
| T50.A12D | Poisoning by pertussis vaccine, including combinations with a pertussis component, intentional self-harm, subsequent encounter |
| T50.A12S | Poisoning by pertussis vaccine, including combinations with a pertussis component, intentional self-harm, sequela              |
| T50.A22A | Poisoning by mixed bacterial vaccines without a pertussis component, intentional self-harm, initial encounter                  |
| T50.A22D | Poisoning by mixed bacterial vaccines without a pertussis component, intentional self-harm, subsequent encounter               |
| T50.A22S | Poisoning by mixed bacterial vaccines without a pertussis component, intentional self-harm, sequela                            |
| T50.A92A | Poisoning by other bacterial vaccines, intentional self-harm, initial encounter                                                |
| T50.A92D | Poisoning by other bacterial vaccines, intentional self-harm, subsequent encounter                                             |
| T50.A92S | Poisoning by other bacterial vaccines, intentional self-harm, sequela                                                          |
| T50.B12A | Poisoning by smallpox vaccines, intentional self-harm, initial encounter                                                       |
| T50.B12D | Poisoning by smallpox vaccines, intentional self-harm, subsequent encounter                                                    |
| T50.B12S | Poisoning by smallpox vaccines, intentional self-harm, sequela                                                                 |
| T50.B92A | Poisoning by other viral vaccines, intentional self-harm, initial encounter                                                    |
| T50.B92D | Poisoning by other viral vaccines, intentional self-harm, subsequent encounter                                                 |
| T50.B92S | Poisoning by other viral vaccines, intentional self-harm, sequela                                                              |
| T50.Z12A | Poisoning by immunoglobulin, intentional self-harm, initial encounter                                                          |
| T50.Z12D | Poisoning by immunoglobulin, intentional self-harm, subsequent encounter                                                       |

|          |                                                                                                    |
|----------|----------------------------------------------------------------------------------------------------|
| T50.Z12S | Poisoning by immunoglobulin, intentional self-harm, sequela                                        |
| T50.Z92A | Poisoning by other vaccines and biological substances, intentional self-harm, initial encounter    |
| T50.Z92D | Poisoning by other vaccines and biological substances, intentional self-harm, subsequent encounter |
| T50.Z92S | Poisoning by other vaccines and biological substances, intentional self-harm, sequela              |
| T51.0X2A | Toxic effect of ethanol, intentional self-harm, initial encounter                                  |
| T51.0X2D | Toxic effect of ethanol, intentional self-harm, subsequent encounter                               |
| T51.0X2S | Toxic effect of ethanol, intentional self-harm, sequela                                            |
| T51.1X2A | Toxic effect of methanol, intentional self-harm, initial encounter                                 |
| T51.1X2D | Toxic effect of methanol, intentional self-harm, subsequent encounter                              |
| T51.1X2S | Toxic effect of methanol, intentional self-harm, sequela                                           |
| T51.2X2A | Toxic effect of 2-Propanol, intentional self-harm, initial encounter                               |
| T51.2X2D | Toxic effect of 2-Propanol, intentional self-harm, subsequent encounter                            |
| T51.2X2S | Toxic effect of 2-Propanol, intentional self-harm, sequela                                         |
| T51.3X2A | Toxic effect of fusel oil, intentional self-harm, initial encounter                                |
| T51.3X2D | Toxic effect of fusel oil, intentional self-harm, subsequent encounter                             |
| T51.3X2S | Toxic effect of fusel oil, intentional self-harm, sequela                                          |
| T51.8X2A | Toxic effect of other alcohols, intentional self-harm, initial encounter                           |
| T51.8X2D | Toxic effect of other alcohols, intentional self-harm, subsequent encounter                        |
| T51.8X2S | Toxic effect of other alcohols, intentional self-harm, sequela                                     |
| T51.92XA | Toxic effect of unspecified alcohol, intentional self-harm, initial encounter                      |
| T51.92XD | Toxic effect of unspecified alcohol, intentional self-harm, subsequent encounter                   |
| T51.92XS | Toxic effect of unspecified alcohol, intentional self-harm, sequela                                |
| T52.0X2A | Toxic effect of petroleum products, intentional self-harm, initial encounter                       |
| T52.0X2D | Toxic effect of petroleum products, intentional self-harm, subsequent encounter                    |
| T52.0X2S | Toxic effect of petroleum products, intentional self-harm, sequela                                 |
| T52.1X2A | Toxic effect of benzene, intentional self-harm, initial encounter                                  |
| T52.1X2D | Toxic effect of benzene, intentional self-harm, subsequent encounter                               |
| T52.1X2S | Toxic effect of benzene, intentional self-harm, sequela                                            |
| T52.2X2A | Toxic effect of homologues of benzene, intentional self-harm, initial encounter                    |
| T52.2X2D | Toxic effect of homologues of benzene, intentional self-harm, subsequent encounter                 |
| T52.2X2S | Toxic effect of homologues of benzene, intentional self-harm, sequela                              |
| T52.3X2A | Toxic effect of glycols, intentional self-harm, initial encounter                                  |
| T52.3X2D | Toxic effect of glycols, intentional self-harm, subsequent encounter                               |
| T52.3X2S | Toxic effect of glycols, intentional self-harm, sequela                                            |
| T52.4X2A | Toxic effect of ketones, intentional self-harm, initial encounter                                  |
| T52.4X2D | Toxic effect of ketones, intentional self-harm, subsequent encounter                               |
| T52.4X2S | Toxic effect of ketones, intentional self-harm, sequela                                            |
| T52.8X2A | Toxic effect of other organic solvents, intentional self-harm, initial encounter                   |
| T52.8X2D | Toxic effect of other organic solvents, intentional self-harm, subsequent encounter                |
| T52.8X2S | Toxic effect of other organic solvents, intentional self-harm, sequela                             |
| T52.92XA | Toxic effect of unspecified organic solvent, intentional self-harm, initial encounter              |

|          |                                                                                                                                     |
|----------|-------------------------------------------------------------------------------------------------------------------------------------|
| T52.92XD | Toxic effect of unspecified organic solvent, intentional self-harm, subsequent encounter                                            |
| T52.92XS | Toxic effect of unspecified organic solvent, intentional self-harm, sequela                                                         |
| T53.0X2A | Toxic effect of carbon tetrachloride, intentional self-harm, initial encounter                                                      |
| T53.0X2D | Toxic effect of carbon tetrachloride, intentional self-harm, subsequent encounter                                                   |
| T53.0X2S | Toxic effect of carbon tetrachloride, intentional self-harm, sequela                                                                |
| T53.1X2A | Toxic effect of chloroform, intentional self-harm, initial encounter                                                                |
| T53.1X2D | Toxic effect of chloroform, intentional self-harm, subsequent encounter                                                             |
| T53.1X2S | Toxic effect of chloroform, intentional self-harm, sequela                                                                          |
| T53.2X2A | Toxic effect of trichloroethylene, intentional self-harm, initial encounter                                                         |
| T53.2X2D | Toxic effect of trichloroethylene, intentional self-harm, subsequent encounter                                                      |
| T53.2X2S | Toxic effect of trichloroethylene, intentional self-harm, sequela                                                                   |
| T53.3X2A | Toxic effect of tetrachloroethylene, intentional self-harm, initial encounter                                                       |
| T53.3X2D | Toxic effect of tetrachloroethylene, intentional self-harm, subsequent encounter                                                    |
| T53.3X2S | Toxic effect of tetrachloroethylene, intentional self-harm, sequela                                                                 |
| T53.4X2A | Toxic effect of dichloromethane, intentional self-harm, initial encounter                                                           |
| T53.4X2D | Toxic effect of dichloromethane, intentional self-harm, subsequent encounter                                                        |
| T53.4X2S | Toxic effect of dichloromethane, intentional self-harm, sequela                                                                     |
| T53.5X2A | Toxic effect of chlorofluorocarbons, intentional self-harm, initial encounter                                                       |
| T53.5X2D | Toxic effect of chlorofluorocarbons, intentional self-harm, subsequent encounter                                                    |
| T53.5X2S | Toxic effect of chlorofluorocarbons, intentional self-harm, sequela                                                                 |
| T53.6X2A | Toxic effect of other halogen derivatives of aliphatic hydrocarbons, intentional self-harm, initial encounter                       |
| T53.6X2D | Toxic effect of other halogen derivatives of aliphatic hydrocarbons, intentional self-harm, subsequent encounter                    |
| T53.6X2S | Toxic effect of other halogen derivatives of aliphatic hydrocarbons, intentional self-harm, sequela                                 |
| T53.7X2A | Toxic effect of other halogen derivatives of aromatic hydrocarbons, intentional self-harm, initial encounter                        |
| T53.7X2D | Toxic effect of other halogen derivatives of aromatic hydrocarbons, intentional self-harm, subsequent encounter                     |
| T53.7X2S | Toxic effect of other halogen derivatives of aromatic hydrocarbons, intentional self-harm, sequela                                  |
| T53.92XA | Toxic effect of unspecified halogen derivatives of aliphatic and aromatic hydrocarbons, intentional self-harm, initial encounter    |
| T53.92XD | Toxic effect of unspecified halogen derivatives of aliphatic and aromatic hydrocarbons, intentional self-harm, subsequent encounter |
| T53.92XS | Toxic effect of unspecified halogen derivatives of aliphatic and aromatic hydrocarbons, intentional self-harm, sequela              |
| T54.0X2A | Toxic effect of phenol and phenol homologues, intentional self-harm, initial encounter                                              |
| T54.0X2D | Toxic effect of phenol and phenol homologues, intentional self-harm, subsequent encounter                                           |
| T54.0X2S | Toxic effect of phenol and phenol homologues, intentional self-harm, sequela                                                        |
| T54.1X2A | Toxic effect of other corrosive organic compounds, intentional self-harm, initial encounter                                         |
| T54.1X2D | Toxic effect of other corrosive organic compounds, intentional self-harm, subsequent encounter                                      |

|          |                                                                                                           |
|----------|-----------------------------------------------------------------------------------------------------------|
| T54.1X2S | Toxic effect of other corrosive organic compounds, intentional self-harm, sequela                         |
| T54.2X2A | Toxic effect of corrosive acids and acid-like substances, intentional self-harm, initial encounter        |
| T54.2X2D | Toxic effect of corrosive acids and acid-like substances, intentional self-harm, subsequent encounter     |
| T54.2X2S | Toxic effect of corrosive acids and acid-like substances, intentional self-harm, sequela                  |
| T54.3X2A | Toxic effect of corrosive alkalis and alkali-like substances, intentional self-harm, initial encounter    |
| T54.3X2D | Toxic effect of corrosive alkalis and alkali-like substances, intentional self-harm, subsequent encounter |
| T54.3X2S | Toxic effect of corrosive alkalis and alkali-like substances, intentional self-harm, sequela              |
| T54.92XA | Toxic effect of unspecified corrosive substance, intentional self-harm, initial encounter                 |
| T54.92XD | Toxic effect of unspecified corrosive substance, intentional self-harm, subsequent encounter              |
| T54.92XS | Toxic effect of unspecified corrosive substance, intentional self-harm, sequela                           |
| T55.0X2A | Toxic effect of soaps, intentional self-harm, initial encounter                                           |
| T55.0X2D | Toxic effect of soaps, intentional self-harm, subsequent encounter                                        |
| T55.0X2S | Toxic effect of soaps, intentional self-harm, sequela                                                     |
| T55.1X2A | Toxic effect of detergents, intentional self-harm, initial encounter                                      |
| T55.1X2D | Toxic effect of detergents, intentional self-harm, subsequent encounter                                   |
| T55.1X2S | Toxic effect of detergents, intentional self-harm, sequela                                                |
| T56.0X2A | Toxic effect of lead and its compounds, intentional self-harm, initial encounter                          |
| T56.0X2D | Toxic effect of lead and its compounds, intentional self-harm, subsequent encounter                       |
| T56.0X2S | Toxic effect of lead and its compounds, intentional self-harm, sequela                                    |
| T56.1X2A | Toxic effect of mercury and its compounds, intentional self-harm, initial encounter                       |
| T56.1X2D | Toxic effect of mercury and its compounds, intentional self-harm, subsequent encounter                    |
| T56.1X2S | Toxic effect of mercury and its compounds, intentional self-harm, sequela                                 |
| T56.2X2A | Toxic effect of chromium and its compounds, intentional self-harm, initial encounter                      |
| T56.2X2D | Toxic effect of chromium and its compounds, intentional self-harm, subsequent encounter                   |
| T56.2X2S | Toxic effect of chromium and its compounds, intentional self-harm, sequela                                |
| T56.3X2A | Toxic effect of cadmium and its compounds, intentional self-harm, initial encounter                       |
| T56.3X2D | Toxic effect of cadmium and its compounds, intentional self-harm, subsequent encounter                    |
| T56.3X2S | Toxic effect of cadmium and its compounds, intentional self-harm, sequela                                 |
| T56.4X2A | Toxic effect of copper and its compounds, intentional self-harm, initial encounter                        |
| T56.4X2D | Toxic effect of copper and its compounds, intentional self-harm, subsequent encounter                     |
| T56.4X2S | Toxic effect of copper and its compounds, intentional self-harm, sequela                                  |
| T56.5X2A | Toxic effect of zinc and its compounds, intentional self-harm, initial encounter                          |
| T56.5X2D | Toxic effect of zinc and its compounds, intentional self-harm, subsequent encounter                       |
| T56.5X2S | Toxic effect of zinc and its compounds, intentional self-harm, sequela                                    |
| T56.6X2A | Toxic effect of tin and its compounds, intentional self-harm, initial encounter                           |
| T56.6X2D | Toxic effect of tin and its compounds, intentional self-harm, subsequent encounter                        |
| T56.6X2S | Toxic effect of tin and its compounds, intentional self-harm, sequela                                     |
| T56.7X2A | Toxic effect of beryllium and its compounds, intentional self-harm, initial encounter                     |
| T56.7X2D | Toxic effect of beryllium and its compounds, intentional self-harm, subsequent encounter                  |

|          |                                                                                                                              |
|----------|------------------------------------------------------------------------------------------------------------------------------|
| T56.7X2S | Toxic effect of beryllium and its compounds, intentional self-harm, sequela                                                  |
| T56.812A | Toxic effect of thallium, intentional self-harm, initial encounter                                                           |
| T56.812D | Toxic effect of thallium, intentional self-harm, subsequent encounter                                                        |
| T56.812S | Toxic effect of thallium, intentional self-harm, sequela                                                                     |
| T56.892A | Toxic effect of other metals, intentional self-harm, initial encounter                                                       |
| T56.892D | Toxic effect of other metals, intentional self-harm, subsequent encounter                                                    |
| T56.892S | Toxic effect of other metals, intentional self-harm, sequela                                                                 |
| T56.92XA | Toxic effect of unspecified metal, intentional self-harm, initial encounter                                                  |
| T56.92XD | Toxic effect of unspecified metal, intentional self-harm, subsequent encounter                                               |
| T56.92XS | Toxic effect of unspecified metal, intentional self-harm, sequela                                                            |
| T57.0X2A | Toxic effect of arsenic and its compounds, intentional self-harm, initial encounter                                          |
| T57.0X2D | Toxic effect of arsenic and its compounds, intentional self-harm, subsequent encounter                                       |
| T57.0X2S | Toxic effect of arsenic and its compounds, intentional self-harm, sequela                                                    |
| T57.1X2A | Toxic effect of phosphorus and its compounds, intentional self-harm, initial encounter                                       |
| T57.1X2D | Toxic effect of phosphorus and its compounds, intentional self-harm, subsequent encounter                                    |
| T57.1X2S | Toxic effect of phosphorus and its compounds, intentional self-harm, sequela                                                 |
| T57.2X2A | Toxic effect of manganese and its compounds, intentional self-harm, initial encounter                                        |
| T57.2X2D | Toxic effect of manganese and its compounds, intentional self-harm, subsequent encounter                                     |
| T57.2X2S | Toxic effect of manganese and its compounds, intentional self-harm, sequela                                                  |
| T57.3X2A | Toxic effect of hydrogen cyanide, intentional self-harm, initial encounter                                                   |
| T57.3X2D | Toxic effect of hydrogen cyanide, intentional self-harm, subsequent encounter                                                |
| T57.3X2S | Toxic effect of hydrogen cyanide, intentional self-harm, sequela                                                             |
| T57.8X2A | Toxic effect of other specified inorganic substances, intentional self-harm, initial encounter                               |
| T57.8X2D | Toxic effect of other specified inorganic substances, intentional self-harm, subsequent encounter                            |
| T57.8X2S | Toxic effect of other specified inorganic substances, intentional self-harm, sequela                                         |
| T57.92XA | Toxic effect of unspecified inorganic substance, intentional self-harm, initial encounter                                    |
| T57.92XD | Toxic effect of unspecified inorganic substance, intentional self-harm, subsequent encounter                                 |
| T57.92XS | Toxic effect of unspecified inorganic substance, intentional self-harm, sequela                                              |
| T58.02XA | Toxic effect of carbon monoxide from motor vehicle exhaust, intentional self-harm, initial encounter                         |
| T58.02XD | Toxic effect of carbon monoxide from motor vehicle exhaust, intentional self-harm, subsequent encounter                      |
| T58.02XS | Toxic effect of carbon monoxide from motor vehicle exhaust, intentional self-harm, sequela                                   |
| T58.12XA | Toxic effect of carbon monoxide from utility gas, intentional self-harm, initial encounter                                   |
| T58.12XD | Toxic effect of carbon monoxide from utility gas, intentional self-harm, subsequent encounter                                |
| T58.12XS | Toxic effect of carbon monoxide from utility gas, intentional self-harm, sequela                                             |
| T58.2X2A | Toxic effect of carbon monoxide from incomplete combustion of other domestic fuels, intentional self-harm, initial encounter |

|          |                                                                                                                                 |
|----------|---------------------------------------------------------------------------------------------------------------------------------|
| T58.2X2D | Toxic effect of carbon monoxide from incomplete combustion of other domestic fuels, intentional self-harm, subsequent encounter |
| T58.2X2S | Toxic effect of carbon monoxide from incomplete combustion of other domestic fuels, intentional self-harm, sequela              |
| T58.8X2A | Toxic effect of carbon monoxide from other source, intentional self-harm, initial encounter                                     |
| T58.8X2D | Toxic effect of carbon monoxide from other source, intentional self-harm, subsequent encounter                                  |
| T58.8X2S | Toxic effect of carbon monoxide from other source, intentional self-harm, sequela                                               |
| T58.92XA | Toxic effect of carbon monoxide from unspecified source, intentional self-harm, initial encounter                               |
| T58.92XD | Toxic effect of carbon monoxide from unspecified source, intentional self-harm, subsequent encounter                            |
| T58.92XS | Toxic effect of carbon monoxide from unspecified source, intentional self-harm, sequela                                         |
| T59.0X2A | Toxic effect of nitrogen oxides, intentional self-harm, initial encounter                                                       |
| T59.0X2D | Toxic effect of nitrogen oxides, intentional self-harm, subsequent encounter                                                    |
| T59.0X2S | Toxic effect of nitrogen oxides, intentional self-harm, sequela                                                                 |
| T59.1X2A | Toxic effect of sulfur dioxide, intentional self-harm, initial encounter                                                        |
| T59.1X2D | Toxic effect of sulfur dioxide, intentional self-harm, subsequent encounter                                                     |
| T59.1X2S | Toxic effect of sulfur dioxide, intentional self-harm, sequela                                                                  |
| T59.2X2A | Toxic effect of formaldehyde, intentional self-harm, initial encounter                                                          |
| T59.2X2D | Toxic effect of formaldehyde, intentional self-harm, subsequent encounter                                                       |
| T59.2X2S | Toxic effect of formaldehyde, intentional self-harm, sequela                                                                    |
| T59.3X2A | Toxic effect of lacrimogenic gas, intentional self-harm, initial encounter                                                      |
| T59.3X2D | Toxic effect of lacrimogenic gas, intentional self-harm, subsequent encounter                                                   |
| T59.3X2S | Toxic effect of lacrimogenic gas, intentional self-harm, sequela                                                                |
| T59.4X2A | Toxic effect of chlorine gas, intentional self-harm, initial encounter                                                          |
| T59.4X2D | Toxic effect of chlorine gas, intentional self-harm, subsequent encounter                                                       |
| T59.4X2S | Toxic effect of chlorine gas, intentional self-harm, sequela                                                                    |
| T59.5X2A | Toxic effect of fluorine gas and hydrogen fluoride, intentional self-harm, initial encounter                                    |
| T59.5X2D | Toxic effect of fluorine gas and hydrogen fluoride, intentional self-harm, subsequent encounter                                 |
| T59.5X2S | Toxic effect of fluorine gas and hydrogen fluoride, intentional self-harm, sequela                                              |
| T59.6X2A | Toxic effect of hydrogen sulfide, intentional self-harm, initial encounter                                                      |
| T59.6X2D | Toxic effect of hydrogen sulfide, intentional self-harm, subsequent encounter                                                   |
| T59.6X2S | Toxic effect of hydrogen sulfide, intentional self-harm, sequela                                                                |
| T59.7X2A | Toxic effect of carbon dioxide, intentional self-harm, initial encounter                                                        |
| T59.7X2D | Toxic effect of carbon dioxide, intentional self-harm, subsequent encounter                                                     |
| T59.7X2S | Toxic effect of carbon dioxide, intentional self-harm, sequela                                                                  |
| T59.812A | Toxic effect of smoke, intentional self-harm, initial encounter                                                                 |
| T59.812D | Toxic effect of smoke, intentional self-harm, subsequent encounter                                                              |
| T59.812S | Toxic effect of smoke, intentional self-harm, sequela                                                                           |
| T59.892A | Toxic effect of other specified gases, fumes and vapors, intentional self-harm, initial encounter                               |



|          |                                                                                                         |
|----------|---------------------------------------------------------------------------------------------------------|
| T59.892D | Toxic effect of other specified gases, fumes and vapors, intentional self-harm, subsequent encounter    |
| T59.892S | Toxic effect of other specified gases, fumes and vapors, intentional self-harm, sequela                 |
| T59.92XA | Toxic effect of unspecified gases, fumes and vapors, intentional self-harm, initial encounter           |
| T59.92XD | Toxic effect of unspecified gases, fumes and vapors, intentional self-harm, subsequent encounter        |
| T59.92XS | Toxic effect of unspecified gases, fumes and vapors, intentional self-harm, sequela                     |
| T60.0X2A | Toxic effect of organophosphate and carbamate insecticides, intentional self-harm, initial encounter    |
| T60.0X2D | Toxic effect of organophosphate and carbamate insecticides, intentional self-harm, subsequent encounter |
| T60.0X2S | Toxic effect of organophosphate and carbamate insecticides, intentional self-harm, sequela              |
| T60.1X2A | Toxic effect of halogenated insecticides, intentional self-harm, initial encounter                      |
| T60.1X2D | Toxic effect of halogenated insecticides, intentional self-harm, subsequent encounter                   |
| T60.1X2S | Toxic effect of halogenated insecticides, intentional self-harm, sequela                                |
| T60.2X2A | Toxic effect of other insecticides, intentional self-harm, initial encounter                            |
| T60.2X2D | Toxic effect of other insecticides, intentional self-harm, subsequent encounter                         |
| T60.2X2S | Toxic effect of other insecticides, intentional self-harm, sequela                                      |
| T60.3X2A | Toxic effect of herbicides and fungicides, intentional self-harm, initial encounter                     |
| T60.3X2D | Toxic effect of herbicides and fungicides, intentional self-harm, subsequent encounter                  |
| T60.3X2S | Toxic effect of herbicides and fungicides, intentional self-harm, sequela                               |
| T60.4X2A | Toxic effect of rodenticides, intentional self-harm, initial encounter                                  |
| T60.4X2D | Toxic effect of rodenticides, intentional self-harm, subsequent encounter                               |
| T60.4X2S | Toxic effect of rodenticides, intentional self-harm, sequela                                            |
| T60.8X2A | Toxic effect of other pesticides, intentional self-harm, initial encounter                              |
| T60.8X2D | Toxic effect of other pesticides, intentional self-harm, subsequent encounter                           |
| T60.8X2S | Toxic effect of other pesticides, intentional self-harm, sequela                                        |
| T60.92XA | Toxic effect of unspecified pesticide, intentional self-harm, initial encounter                         |
| T60.92XD | Toxic effect of unspecified pesticide, intentional self-harm, subsequent encounter                      |
| T60.92XS | Toxic effect of unspecified pesticide, intentional self-harm, sequela                                   |
| T61.02XA | Ciguatera fish poisoning, intentional self-harm, initial encounter                                      |
| T61.02XD | Ciguatera fish poisoning, intentional self-harm, subsequent encounter                                   |
| T61.02XS | Ciguatera fish poisoning, intentional self-harm, sequela                                                |
| T61.12XA | Scombroid fish poisoning, intentional self-harm, initial encounter                                      |
| T61.12XD | Scombroid fish poisoning, intentional self-harm, subsequent encounter                                   |
| T61.12XS | Scombroid fish poisoning, intentional self-harm, sequela                                                |
| T61.772A | Other fish poisoning, intentional self-harm, initial encounter                                          |
| T61.772D | Other fish poisoning, intentional self-harm, subsequent encounter                                       |
| T61.772S | Other fish poisoning, intentional self-harm, sequela                                                    |
| T61.782A | Other shellfish poisoning, intentional self-harm, initial encounter                                     |
| T61.782D | Other shellfish poisoning, intentional self-harm, subsequent encounter                                  |
| T61.782S | Other shellfish poisoning, intentional self-harm, sequela                                               |

|          |                                                                                                               |
|----------|---------------------------------------------------------------------------------------------------------------|
| T61.8X2A | Toxic effect of other seafood, intentional self-harm, initial encounter                                       |
| T61.8X2D | Toxic effect of other seafood, intentional self-harm, subsequent encounter                                    |
| T61.8X2S | Toxic effect of other seafood, intentional self-harm, sequela                                                 |
| T61.92XA | Toxic effect of unspecified seafood, intentional self-harm, initial encounter                                 |
| T61.92XD | Toxic effect of unspecified seafood, intentional self-harm, subsequent encounter                              |
| T61.92XS | Toxic effect of unspecified seafood, intentional self-harm, sequela                                           |
| T62.0X2A | Toxic effect of ingested mushrooms, intentional self-harm, initial encounter                                  |
| T62.0X2D | Toxic effect of ingested mushrooms, intentional self-harm, subsequent encounter                               |
| T62.0X2S | Toxic effect of ingested mushrooms, intentional self-harm, sequela                                            |
| T62.1X2A | Toxic effect of ingested berries, intentional self-harm, initial encounter                                    |
| T62.1X2D | Toxic effect of ingested berries, intentional self-harm, subsequent encounter                                 |
| T62.1X2S | Toxic effect of ingested berries, intentional self-harm, sequela                                              |
| T62.2X2A | Toxic effect of other ingested (parts of) plant(s), intentional self-harm, initial encounter                  |
| T62.2X2D | Toxic effect of other ingested (parts of) plant(s), intentional self-harm, subsequent encounter               |
| T62.2X2S | Toxic effect of other ingested (parts of) plant(s), intentional self-harm, sequela                            |
| T62.8X2A | Toxic effect of other specified noxious substances eaten as food, intentional self-harm, initial encounter    |
| T62.8X2D | Toxic effect of other specified noxious substances eaten as food, intentional self-harm, subsequent encounter |
| T62.8X2S | Toxic effect of other specified noxious substances eaten as food, intentional self-harm, sequela              |
| T62.92XA | Toxic effect of unspecified noxious substance eaten as food, intentional self-harm, initial encounter         |
| T62.92XD | Toxic effect of unspecified noxious substance eaten as food, intentional self-harm, subsequent encounter      |
| T62.92XS | Toxic effect of unspecified noxious substance eaten as food, intentional self-harm, sequela                   |
| T63.002A | Toxic effect of unspecified snake venom, intentional self-harm, initial encounter                             |
| T63.002D | Toxic effect of unspecified snake venom, intentional self-harm, subsequent encounter                          |
| T63.002S | Toxic effect of unspecified snake venom, intentional self-harm, sequela                                       |
| T63.012A | Toxic effect of rattlesnake venom, intentional self-harm, initial encounter                                   |
| T63.012D | Toxic effect of rattlesnake venom, intentional self-harm, subsequent encounter                                |
| T63.012S | Toxic effect of rattlesnake venom, intentional self-harm, sequela                                             |
| T63.022A | Toxic effect of coral snake venom, intentional self-harm, initial encounter                                   |
| T63.022D | Toxic effect of coral snake venom, intentional self-harm, subsequent encounter                                |
| T63.022S | Toxic effect of coral snake venom, intentional self-harm, sequela                                             |
| T63.032A | Toxic effect of taipan venom, intentional self-harm, initial encounter                                        |
| T63.032D | Toxic effect of taipan venom, intentional self-harm, subsequent encounter                                     |
| T63.032S | Toxic effect of taipan venom, intentional self-harm, sequela                                                  |
| T63.042A | Toxic effect of cobra venom, intentional self-harm, initial encounter                                         |
| T63.042D | Toxic effect of cobra venom, intentional self-harm, subsequent encounter                                      |
| T63.042S | Toxic effect of cobra venom, intentional self-harm, sequela                                                   |
| T63.062A | Toxic effect of venom of other North and South American snake, intentional self-harm, initial encounter       |

|          |                                                                                                            |
|----------|------------------------------------------------------------------------------------------------------------|
| T63.062D | Toxic effect of venom of other North and South American snake, intentional self-harm, subsequent encounter |
| T63.062S | Toxic effect of venom of other North and South American snake, intentional self-harm, sequela              |
| T63.072A | Toxic effect of venom of other Australian snake, intentional self-harm, initial encounter                  |
| T63.072D | Toxic effect of venom of other Australian snake, intentional self-harm, subsequent encounter               |
| T63.072S | Toxic effect of venom of other Australian snake, intentional self-harm, sequela                            |
| T63.082A | Toxic effect of venom of other African and Asian snake, intentional self-harm, initial encounter           |
| T63.082D | Toxic effect of venom of other African and Asian snake, intentional self-harm, subsequent encounter        |
| T63.082S | Toxic effect of venom of other African and Asian snake, intentional self-harm, sequela                     |
| T63.092A | Toxic effect of venom of other snake, intentional self-harm, initial encounter                             |
| T63.092D | Toxic effect of venom of other snake, intentional self-harm, subsequent encounter                          |
| T63.092S | Toxic effect of venom of other snake, intentional self-harm, sequela                                       |
| T63.112A | Toxic effect of venom of gila monster, intentional self-harm, initial encounter                            |
| T63.112D | Toxic effect of venom of gila monster, intentional self-harm, subsequent encounter                         |
| T63.112S | Toxic effect of venom of gila monster, intentional self-harm, sequela                                      |
| T63.122A | Toxic effect of venom of other venomous lizard, intentional self-harm, initial encounter                   |
| T63.122D | Toxic effect of venom of other venomous lizard, intentional self-harm, subsequent encounter                |
| T63.122S | Toxic effect of venom of other venomous lizard, intentional self-harm, sequela                             |
| T63.192A | Toxic effect of venom of other reptiles, intentional self-harm, initial encounter                          |
| T63.192D | Toxic effect of venom of other reptiles, intentional self-harm, subsequent encounter                       |
| T63.192S | Toxic effect of venom of other reptiles, intentional self-harm, sequela                                    |
| T63.2X2A | Toxic effect of venom of scorpion, intentional self-harm, initial encounter                                |
| T63.2X2D | Toxic effect of venom of scorpion, intentional self-harm, subsequent encounter                             |
| T63.2X2S | Toxic effect of venom of scorpion, intentional self-harm, sequela                                          |
| T63.302A | Toxic effect of unspecified spider venom, intentional self-harm, initial encounter                         |
| T63.302D | Toxic effect of unspecified spider venom, intentional self-harm, subsequent encounter                      |
| T63.302S | Toxic effect of unspecified spider venom, intentional self-harm, sequela                                   |
| T63.312A | Toxic effect of venom of black widow spider, intentional self-harm, initial encounter                      |
| T63.312D | Toxic effect of venom of black widow spider, intentional self-harm, subsequent encounter                   |
| T63.312S | Toxic effect of venom of black widow spider, intentional self-harm, sequela                                |
| T63.322A | Toxic effect of venom of tarantula, intentional self-harm, initial encounter                               |
| T63.322D | Toxic effect of venom of tarantula, intentional self-harm, subsequent encounter                            |
| T63.322S | Toxic effect of venom of tarantula, intentional self-harm, sequela                                         |
| T63.332A | Toxic effect of venom of brown recluse spider, intentional self-harm, initial encounter                    |
| T63.332D | Toxic effect of venom of brown recluse spider, intentional self-harm, subsequent encounter                 |
| T63.332S | Toxic effect of venom of brown recluse spider, intentional self-harm, sequela                              |
| T63.392A | Toxic effect of venom of other spider, intentional self-harm, initial encounter                            |
| T63.392D | Toxic effect of venom of other spider, intentional self-harm, subsequent encounter                         |

|          |                                                                                                          |
|----------|----------------------------------------------------------------------------------------------------------|
| T63.392S | Toxic effect of venom of other spider, intentional self-harm, sequela                                    |
| T63.412A | Toxic effect of venom of centipedes and venomous millipedes, intentional self-harm, initial encounter    |
| T63.412D | Toxic effect of venom of centipedes and venomous millipedes, intentional self-harm, subsequent encounter |
| T63.412S | Toxic effect of venom of centipedes and venomous millipedes, intentional self-harm, sequela              |
| T63.422A | Toxic effect of venom of ants, intentional self-harm, initial encounter                                  |
| T63.422D | Toxic effect of venom of ants, intentional self-harm, subsequent encounter                               |
| T63.422S | Toxic effect of venom of ants, intentional self-harm, sequela                                            |
| T63.432A | Toxic effect of venom of caterpillars, intentional self-harm, initial encounter                          |
| T63.432D | Toxic effect of venom of caterpillars, intentional self-harm, subsequent encounter                       |
| T63.432S | Toxic effect of venom of caterpillars, intentional self-harm, sequela                                    |
| T63.442A | Toxic effect of venom of bees, intentional self-harm, initial encounter                                  |
| T63.442D | Toxic effect of venom of bees, intentional self-harm, subsequent encounter                               |
| T63.442S | Toxic effect of venom of bees, intentional self-harm, sequela                                            |
| T63.452A | Toxic effect of venom of hornets, intentional self-harm, initial encounter                               |
| T63.452D | Toxic effect of venom of hornets, intentional self-harm, subsequent encounter                            |
| T63.452S | Toxic effect of venom of hornets, intentional self-harm, sequela                                         |
| T63.462A | Toxic effect of venom of wasps, intentional self-harm, initial encounter                                 |
| T63.462D | Toxic effect of venom of wasps, intentional self-harm, subsequent encounter                              |
| T63.462S | Toxic effect of venom of wasps, intentional self-harm, sequela                                           |
| T63.482A | Toxic effect of venom of other arthropod, intentional self-harm, initial encounter                       |
| T63.482D | Toxic effect of venom of other arthropod, intentional self-harm, subsequent encounter                    |
| T63.482S | Toxic effect of venom of other arthropod, intentional self-harm, sequela                                 |
| T63.512A | Toxic effect of contact with stingray, intentional self-harm, initial encounter                          |
| T63.512D | Toxic effect of contact with stingray, intentional self-harm, subsequent encounter                       |
| T63.512S | Toxic effect of contact with stingray, intentional self-harm, sequela                                    |
| T63.592A | Toxic effect of contact with other venomous fish, intentional self-harm, initial encounter               |
| T63.592D | Toxic effect of contact with other venomous fish, intentional self-harm, subsequent encounter            |
| T63.592S | Toxic effect of contact with other venomous fish, intentional self-harm, sequela                         |
| T63.612A | Toxic effect of contact with Portugese Man-o-war, intentional self-harm, initial encounter               |
| T63.612D | Toxic effect of contact with Portugese Man-o-war, intentional self-harm, subsequent encounter            |
| T63.612S | Toxic effect of contact with Portugese Man-o-war, intentional self-harm, sequela                         |
| T63.622A | Toxic effect of contact with other jellyfish, intentional self-harm, initial encounter                   |
| T63.622D | Toxic effect of contact with other jellyfish, intentional self-harm, subsequent encounter                |
| T63.622S | Toxic effect of contact with other jellyfish, intentional self-harm, sequela                             |
| T63.632A | Toxic effect of contact with sea anemone, intentional self-harm, initial encounter                       |
| T63.632D | Toxic effect of contact with sea anemone, intentional self-harm, subsequent encounter                    |
| T63.632S | Toxic effect of contact with sea anemone, intentional self-harm, sequela                                 |
| T63.692A | Toxic effect of contact with other venomous marine animals, intentional self-harm, initial encounter     |

|          |                                                                                                         |
|----------|---------------------------------------------------------------------------------------------------------|
| T63.692D | Toxic effect of contact with other venomous marine animals, intentional self-harm, subsequent encounter |
| T63.692S | Toxic effect of contact with other venomous marine animals, intentional self-harm, sequela              |
| T63.712A | Toxic effect of contact with venomous marine plant, intentional self-harm, initial encounter            |
| T63.712D | Toxic effect of contact with venomous marine plant, intentional self-harm, subsequent encounter         |
| T63.712S | Toxic effect of contact with venomous marine plant, intentional self-harm, sequela                      |
| T63.792A | Toxic effect of contact with other venomous plant, intentional self-harm, initial encounter             |
| T63.792D | Toxic effect of contact with other venomous plant, intentional self-harm, subsequent encounter          |
| T63.792S | Toxic effect of contact with other venomous plant, intentional self-harm, sequela                       |
| T63.812A | Toxic effect of contact with venomous frog, intentional self-harm, initial encounter                    |
| T63.812D | Toxic effect of contact with venomous frog, intentional self-harm, subsequent encounter                 |
| T63.812S | Toxic effect of contact with venomous frog, intentional self-harm, sequela                              |
| T63.822A | Toxic effect of contact with venomous toad, intentional self-harm, initial encounter                    |
| T63.822D | Toxic effect of contact with venomous toad, intentional self-harm, subsequent encounter                 |
| T63.822S | Toxic effect of contact with venomous toad, intentional self-harm, sequela                              |
| T63.832A | Toxic effect of contact with other venomous amphibian, intentional self-harm, initial encounter         |
| T63.832D | Toxic effect of contact with other venomous amphibian, intentional self-harm, subsequent encounter      |
| T63.832S | Toxic effect of contact with other venomous amphibian, intentional self-harm, sequela                   |
| T63.892A | Toxic effect of contact with other venomous animals, intentional self-harm, initial encounter           |
| T63.892D | Toxic effect of contact with other venomous animals, intentional self-harm, subsequent encounter        |
| T63.892S | Toxic effect of contact with other venomous animals, intentional self-harm, sequela                     |
| T63.92XA | Toxic effect of contact with unspecified venomous animal, intentional self-harm, initial encounter      |
| T63.92XD | Toxic effect of contact with unspecified venomous animal, intentional self-harm, subsequent encounter   |
| T63.92XS | Toxic effect of contact with unspecified venomous animal, intentional self-harm, sequela                |
| T64.02XA | Toxic effect of aflatoxin, intentional self-harm, initial encounter                                     |
| T64.02XD | Toxic effect of aflatoxin, intentional self-harm, subsequent encounter                                  |
| T64.02XS | Toxic effect of aflatoxin, intentional self-harm, sequela                                               |
| T64.82XA | Toxic effect of other mycotoxin food contaminants, intentional self-harm, initial encounter             |
| T64.82XD | Toxic effect of other mycotoxin food contaminants, intentional self-harm, subsequent encounter          |
| T64.82XS | Toxic effect of other mycotoxin food contaminants, intentional self-harm, sequela                       |
| T65.0X2A | Toxic effect of cyanides, intentional self-harm, initial encounter                                      |
| T65.0X2D | Toxic effect of cyanides, intentional self-harm, subsequent encounter                                   |
| T65.0X2S | Toxic effect of cyanides, intentional self-harm, sequela                                                |
| T65.1X2A | Toxic effect of strychnine and its salts, intentional self-harm, initial encounter                      |

|          |                                                                                                                                  |
|----------|----------------------------------------------------------------------------------------------------------------------------------|
| T65.1X2D | Toxic effect of strychnine and its salts, intentional self-harm, subsequent encounter                                            |
| T65.1X2S | Toxic effect of strychnine and its salts, intentional self-harm, sequela                                                         |
| T65.212A | Toxic effect of chewing tobacco, intentional self-harm, initial encounter                                                        |
| T65.212D | Toxic effect of chewing tobacco, intentional self-harm, subsequent encounter                                                     |
| T65.212S | Toxic effect of chewing tobacco, intentional self-harm, sequela                                                                  |
| T65.222A | Toxic effect of tobacco cigarettes, intentional self-harm, initial encounter                                                     |
| T65.222D | Toxic effect of tobacco cigarettes, intentional self-harm, subsequent encounter                                                  |
| T65.222S | Toxic effect of tobacco cigarettes, intentional self-harm, sequela                                                               |
| T65.292A | Toxic effect of other tobacco and nicotine, intentional self-harm, initial encounter                                             |
| T65.292D | Toxic effect of other tobacco and nicotine, intentional self-harm, subsequent encounter                                          |
| T65.292S | Toxic effect of other tobacco and nicotine, intentional self-harm, sequela                                                       |
| T65.3X2A | Toxic effect of nitroderivatives and aminoderivatives of benzene and its homologues, intentional self-harm, initial encounter    |
| T65.3X2D | Toxic effect of nitroderivatives and aminoderivatives of benzene and its homologues, intentional self-harm, subsequent encounter |
| T65.3X2S | Toxic effect of nitroderivatives and aminoderivatives of benzene and its homologues, intentional self-harm, sequela              |
| T65.4X2A | Toxic effect of carbon disulfide, intentional self-harm, initial encounter                                                       |
| T65.4X2D | Toxic effect of carbon disulfide, intentional self-harm, subsequent encounter                                                    |
| T65.4X2S | Toxic effect of carbon disulfide, intentional self-harm, sequela                                                                 |
| T65.5X2A | Toxic effect of nitroglycerin and other nitric acids and esters, intentional self-harm, initial encounter                        |
| T65.5X2D | Toxic effect of nitroglycerin and other nitric acids and esters, intentional self-harm, subsequent encounter                     |
| T65.5X2S | Toxic effect of nitroglycerin and other nitric acids and esters, intentional self-harm, sequela                                  |
| T65.6X2A | Toxic effect of paints and dyes, not elsewhere classified, intentional self-harm, initial encounter                              |
| T65.6X2D | Toxic effect of paints and dyes, not elsewhere classified, intentional self-harm, subsequent encounter                           |
| T65.6X2S | Toxic effect of paints and dyes, not elsewhere classified, intentional self-harm, sequela                                        |
| T65.812A | Toxic effect of latex, intentional self-harm, initial encounter                                                                  |
| T65.812D | Toxic effect of latex, intentional self-harm, subsequent encounter                                                               |
| T65.812S | Toxic effect of latex, intentional self-harm, sequela                                                                            |
| T65.822A | Toxic effect of harmful algae and algae toxins, intentional self-harm, initial encounter                                         |
| T65.822D | Toxic effect of harmful algae and algae toxins, intentional self-harm, subsequent encounter                                      |
| T65.822S | Toxic effect of harmful algae and algae toxins, intentional self-harm, sequela                                                   |
| T65.832A | Toxic effect of fiberglass, intentional self-harm, initial encounter                                                             |
| T65.832D | Toxic effect of fiberglass, intentional self-harm, subsequent encounter                                                          |
| T65.832S | Toxic effect of fiberglass, intentional self-harm, sequela                                                                       |
| T65.892A | Toxic effect of other specified substances, intentional self-harm, initial encounter                                             |
| T65.892D | Toxic effect of other specified substances, intentional self-harm, subsequent encounter                                          |
| T65.892S | Toxic effect of other specified substances, intentional self-harm, sequela                                                       |

|          |                                                                                                                     |
|----------|---------------------------------------------------------------------------------------------------------------------|
| T65.92XA | Toxic effect of unspecified substance, intentional self-harm, initial encounter                                     |
| T65.92XD | Toxic effect of unspecified substance, intentional self-harm, subsequent encounter                                  |
| T65.92XS | Toxic effect of unspecified substance, intentional self-harm, sequela                                               |
| T71.112A | Asphyxiation due to smothering under pillow, intentional self-harm, initial encounter                               |
| T71.112D | Asphyxiation due to smothering under pillow, intentional self-harm, subsequent encounter                            |
| T71.112S | Asphyxiation due to smothering under pillow, intentional self-harm, sequela                                         |
| T71.122A | Asphyxiation due to plastic bag, intentional self-harm, initial encounter                                           |
| T71.122D | Asphyxiation due to plastic bag, intentional self-harm, subsequent encounter                                        |
| T71.122S | Asphyxiation due to plastic bag, intentional self-harm, sequela                                                     |
| T71.132A | Asphyxiation due to being trapped in bed linens, intentional self-harm, initial encounter                           |
| T71.132D | Asphyxiation due to being trapped in bed linens, intentional self-harm, subsequent encounter                        |
| T71.132S | Asphyxiation due to being trapped in bed linens, intentional self-harm, sequela                                     |
| T71.152A | Asphyxiation due to smothering in furniture, intentional self-harm, initial encounter                               |
| T71.152D | Asphyxiation due to smothering in furniture, intentional self-harm, subsequent encounter                            |
| T71.152S | Asphyxiation due to smothering in furniture, intentional self-harm, sequela                                         |
| T71.162A | Asphyxiation due to hanging, intentional self-harm, initial encounter                                               |
| T71.162D | Asphyxiation due to hanging, intentional self-harm, subsequent encounter                                            |
| T71.162S | Asphyxiation due to hanging, intentional self-harm, sequela                                                         |
| T71.192A | Asphyxiation due to mechanical threat to breathing due to other causes, intentional self-harm, initial encounter    |
| T71.192D | Asphyxiation due to mechanical threat to breathing due to other causes, intentional self-harm, subsequent encounter |
| T71.192S | Asphyxiation due to mechanical threat to breathing due to other causes, intentional self-harm, sequela              |
| T71.222A | Asphyxiation due to being trapped in a car trunk, intentional self-harm, initial encounter                          |
| T71.222D | Asphyxiation due to being trapped in a car trunk, intentional self-harm, subsequent encounter                       |
| T71.222S | Asphyxiation due to being trapped in a car trunk, intentional self-harm, sequela                                    |
| T71.232A | Asphyxiation due to being trapped in a (discarded) refrigerator, intentional self-harm, initial encounter           |
| T71.232D | Asphyxiation due to being trapped in a (discarded) refrigerator, intentional self-harm, subsequent encounter        |
| T71.232S | Asphyxiation due to being trapped in a (discarded) refrigerator, intentional self-harm, sequela                     |
| X71.0XXA | Intentional self-harm by drowning and submersion while in bathtub, initial encounter                                |
| X71.0XXD | Intentional self-harm by drowning and submersion while in bathtub, subsequent encounter                             |
| X71.0XXS | Intentional self-harm by drowning and submersion while in bathtub, sequela                                          |
| X71.1XXA | Intentional self-harm by drowning and submersion while in swimming pool, initial encounter                          |
| X71.1XXD | Intentional self-harm by drowning and submersion while in swimming pool, subsequent encounter                       |
| X71.1XXS | Intentional self-harm by drowning and submersion while in swimming pool, sequela                                    |

|          |                                                                                                      |
|----------|------------------------------------------------------------------------------------------------------|
| X71.2XXA | Intentional self-harm by drowning and submersion after jump into swimming pool, initial encounter    |
| X71.2XXD | Intentional self-harm by drowning and submersion after jump into swimming pool, subsequent encounter |
| X71.2XXS | Intentional self-harm by drowning and submersion after jump into swimming pool, sequela              |
| X71.3XXA | Intentional self-harm by drowning and submersion in natural water, initial encounter                 |
| X71.3XXD | Intentional self-harm by drowning and submersion in natural water, subsequent encounter              |
| X71.3XXS | Intentional self-harm by drowning and submersion in natural water, sequela                           |
| X71.8XXA | Other intentional self-harm by drowning and submersion, initial encounter                            |
| X71.8XXD | Other intentional self-harm by drowning and submersion, subsequent encounter                         |
| X71.8XXS | Other intentional self-harm by drowning and submersion, sequela                                      |
| X71.9XXA | Intentional self-harm by drowning and submersion, unspecified, initial encounter                     |
| X71.9XXD | Intentional self-harm by drowning and submersion, unspecified, subsequent encounter                  |
| X71.9XXS | Intentional self-harm by drowning and submersion, unspecified, sequela                               |
| X72.XXXA | Intentional self-harm by handgun discharge, initial encounter                                        |
| X72.XXXD | Intentional self-harm by handgun discharge, subsequent encounter                                     |
| X72.XXXS | Intentional self-harm by handgun discharge, sequela                                                  |
| X73.0XXA | Intentional self-harm by shotgun discharge, initial encounter                                        |
| X73.0XXD | Intentional self-harm by shotgun discharge, subsequent encounter                                     |
| X73.0XXS | Intentional self-harm by shotgun discharge, sequela                                                  |
| X73.1XXA | Intentional self-harm by hunting rifle discharge, initial encounter                                  |
| X73.1XXD | Intentional self-harm by hunting rifle discharge, subsequent encounter                               |
| X73.1XXS | Intentional self-harm by hunting rifle discharge, sequela                                            |
| X73.2XXA | Intentional self-harm by machine gun discharge, initial encounter                                    |
| X73.2XXD | Intentional self-harm by machine gun discharge, subsequent encounter                                 |
| X73.2XXS | Intentional self-harm by machine gun discharge, sequela                                              |
| X73.8XXA | Intentional self-harm by other larger firearm discharge, initial encounter                           |
| X73.8XXD | Intentional self-harm by other larger firearm discharge, subsequent encounter                        |
| X73.8XXS | Intentional self-harm by other larger firearm discharge, sequela                                     |
| X73.9XXA | Intentional self-harm by unspecified larger firearm discharge, initial encounter                     |
| X73.9XXD | Intentional self-harm by unspecified larger firearm discharge, subsequent encounter                  |
| X73.9XXS | Intentional self-harm by unspecified larger firearm discharge, sequela                               |
| X74.01XA | Intentional self-harm by airgun, initial encounter                                                   |
| X74.01XD | Intentional self-harm by airgun, subsequent encounter                                                |
| X74.01XS | Intentional self-harm by airgun, sequela                                                             |
| X74.02XA | Intentional self-harm by paintball gun, initial encounter                                            |
| X74.02XD | Intentional self-harm by paintball gun, subsequent encounter                                         |
| X74.02XS | Intentional self-harm by paintball gun, sequela                                                      |
| X74.09XA | Intentional self-harm by other gas, air or spring-operated gun, initial encounter                    |
| X74.09XD | Intentional self-harm by other gas, air or spring-operated gun, subsequent encounter                 |
| X74.09XS | Intentional self-harm by other gas, air or spring-operated gun, sequela                              |



|          |                                                                              |
|----------|------------------------------------------------------------------------------|
| X74.8XXA | Intentional self-harm by other firearm discharge, initial encounter          |
| X74.8XXD | Intentional self-harm by other firearm discharge, subsequent encounter       |
| X74.8XXS | Intentional self-harm by other firearm discharge, sequela                    |
| X74.9XXA | Intentional self-harm by unspecified firearm discharge, initial encounter    |
| X74.9XXD | Intentional self-harm by unspecified firearm discharge, subsequent encounter |
| X74.9XXS | Intentional self-harm by unspecified firearm discharge, sequela              |
| X75.XXXA | Intentional self-harm by explosive material, initial encounter               |
| X75.XXXD | Intentional self-harm by explosive material, subsequent encounter            |
| X75.XXXS | Intentional self-harm by explosive material, sequela                         |
| X76.XXXA | Intentional self-harm by smoke, fire and flames, initial encounter           |
| X76.XXXD | Intentional self-harm by smoke, fire and flames, subsequent encounter        |
| X76.XXXS | Intentional self-harm by smoke, fire and flames, sequela                     |
| X77.0XXA | Intentional self-harm by steam or hot vapors, initial encounter              |
| X77.0XXD | Intentional self-harm by steam or hot vapors, subsequent encounter           |
| X77.0XXS | Intentional self-harm by steam or hot vapors, sequela                        |
| X77.1XXA | Intentional self-harm by hot tap water, initial encounter                    |
| X77.1XXD | Intentional self-harm by hot tap water, subsequent encounter                 |
| X77.1XXS | Intentional self-harm by hot tap water, sequela                              |
| X77.2XXA | Intentional self-harm by other hot fluids, initial encounter                 |
| X77.2XXD | Intentional self-harm by other hot fluids, subsequent encounter              |
| X77.2XXS | Intentional self-harm by other hot fluids, sequela                           |
| X77.3XXA | Intentional self-harm by hot household appliances, initial encounter         |
| X77.3XXD | Intentional self-harm by hot household appliances, subsequent encounter      |
| X77.3XXS | Intentional self-harm by hot household appliances, sequela                   |
| X77.8XXA | Intentional self-harm by other hot objects, initial encounter                |
| X77.8XXD | Intentional self-harm by other hot objects, subsequent encounter             |
| X77.8XXS | Intentional self-harm by other hot objects, sequela                          |
| X77.9XXA | Intentional self-harm by unspecified hot objects, initial encounter          |
| X77.9XXD | Intentional self-harm by unspecified hot objects, subsequent encounter       |
| X77.9XXS | Intentional self-harm by unspecified hot objects, sequela                    |
| X78.0XXA | Intentional self-harm by sharp glass, initial encounter                      |
| X78.0XXD | Intentional self-harm by sharp glass, subsequent encounter                   |
| X78.0XXS | Intentional self-harm by sharp glass, sequela                                |
| X78.1XXA | Intentional self-harm by knife, initial encounter                            |
| X78.1XXD | Intentional self-harm by knife, subsequent encounter                         |
| X78.1XXS | Intentional self-harm by knife, sequela                                      |
| X78.2XXA | Intentional self-harm by sword or dagger, initial encounter                  |
| X78.2XXD | Intentional self-harm by sword or dagger, subsequent encounter               |
| X78.2XXS | Intentional self-harm by sword or dagger, sequela                            |
| X78.8XXA | Intentional self-harm by other sharp object, initial encounter               |
| X78.8XXD | Intentional self-harm by other sharp object, subsequent encounter            |
| X78.8XXS | Intentional self-harm by other sharp object, sequela                         |
| X78.9XXA | Intentional self-harm by unspecified sharp object, initial encounter         |

|          |                                                                                                 |
|----------|-------------------------------------------------------------------------------------------------|
| X78.9XXD | Intentional self-harm by unspecified sharp object, subsequent encounter                         |
| X78.9XXS | Intentional self-harm by unspecified sharp object, sequela                                      |
| X79.XXXA | Intentional self-harm by blunt object, initial encounter                                        |
| X79.XXXD | Intentional self-harm by blunt object, subsequent encounter                                     |
| X79.XXXS | Intentional self-harm by blunt object, sequela                                                  |
| X80.XXXA | Intentional self-harm by jumping from a high place, initial encounter                           |
| X80.XXXD | Intentional self-harm by jumping from a high place, subsequent encounter                        |
| X80.XXXS | Intentional self-harm by jumping from a high place, sequela                                     |
| X81.0XXA | Intentional self-harm by jumping or lying in front of motor vehicle, initial encounter          |
| X81.0XXD | Intentional self-harm by jumping or lying in front of motor vehicle, subsequent encounter       |
| X81.0XXS | Intentional self-harm by jumping or lying in front of motor vehicle, sequela                    |
| X81.1XXA | Intentional self-harm by jumping or lying in front of (subway) train, initial encounter         |
| X81.1XXD | Intentional self-harm by jumping or lying in front of (subway) train, subsequent encounter      |
| X81.1XXS | Intentional self-harm by jumping or lying in front of (subway) train, sequela                   |
| X81.8XXA | Intentional self-harm by jumping or lying in front of other moving object, initial encounter    |
| X81.8XXD | Intentional self-harm by jumping or lying in front of other moving object, subsequent encounter |
| X81.8XXS | Intentional self-harm by jumping or lying in front of other moving object, sequela              |
| X82.8XXA | Other intentional self-harm by crashing of motor vehicle, initial encounter                     |
| X82.8XXD | Other intentional self-harm by crashing of motor vehicle, subsequent encounter                  |
| X82.8XXS | Other intentional self-harm by crashing of motor vehicle, sequela                               |
| X83.0XXA | Intentional self-harm by crashing of aircraft, initial encounter                                |
| X83.0XXD | Intentional self-harm by crashing of aircraft, subsequent encounter                             |
| X83.0XXS | Intentional self-harm by crashing of aircraft, sequela                                          |
| X83.1XXA | Intentional self-harm by electrocution, initial encounter                                       |
| X83.1XXD | Intentional self-harm by electrocution, subsequent encounter                                    |
| X83.1XXS | Intentional self-harm by electrocution, sequela                                                 |
| X83.2XXA | Intentional self-harm by exposure to extremes of cold, initial encounter                        |
| X83.2XXD | Intentional self-harm by exposure to extremes of cold, subsequent encounter                     |
| X83.2XXS | Intentional self-harm by exposure to extremes of cold, sequela                                  |
| X83.8XXA | Intentional self-harm by other specified means, initial encounter                               |
| X83.8XXD | Intentional self-harm by other specified means, subsequent encounter                            |
| X83.8XXS | Intentional self-harm by other specified means, sequela                                         |
| T14.91XA | Suicide Attempt, initial encounter                                                              |
| T14.91XD | Suicide Attempt, subsequent encounter                                                           |
| T14.91XS | Suicide Attempt, sequela                                                                        |
| R45.851  | Suicidal ideations                                                                              |

eTable 9: Physical and mental health chronic condition included as covariates

| Physical Health Chronic Conditions            |
|-----------------------------------------------|
| HIV/AIDS                                      |
| Allergic and Other Chronic Sinusitis/Rhinitis |

|                                         |
|-----------------------------------------|
| Anemia                                  |
| Arrhythmia/Conduction Disorder          |
| Asthma                                  |
| Coronary Artery Disease                 |
| Cancer                                  |
| Cerebrovascular Disease                 |
| Coagulation and Hemorrhagic Disorders   |
| Chronic Obstructive Pulmonary Disease   |
| Chronic Pain Syndromes                  |
| Dementia                                |
| Diabetes Mellitus                       |
| Epilepsy/Convulsions                    |
| Esophageal/Gastric/Duodenal Disorders   |
| Heart Failure                           |
| Liver Disease or Hepatitis C            |
| Hypertension                            |
| Inflammatory Bowel Disease              |
| Joint Disorders                         |
| Lipid Disorders                         |
| Multiple Sclerosis                      |
| Overweight/Obesity                      |
| Osteoporosis                            |
| Parkinson's Disease                     |
| Peripheral Nerve Disorders              |
| Renal Failure or Nephropathy            |
| Rheumatologic/Autoimmune Disorders      |
| Spinal Cord Injury or Paralysis         |
| Spine Disorders                         |
| Tobacco Use Disorder                    |
| Tuberculosis                            |
| Traumatic Brain Injury                  |
| Thrombocytopenia                        |
| Thyroid disorders                       |
| Valvular Disease                        |
| Vascular Disease                        |
| <b>Mental Health Chronic Conditions</b> |
| Alcohol Use Disorders                   |
| Anxiety Disorders, Other                |
| Bipolar Disorders                       |
| Depression                              |
| Drug Use Disorders, nonopioid           |
| Drug Use Disorders, opioid              |
| Personality Disorders                   |

|                            |
|----------------------------|
| Psychotic Disorders, Other |
| PTSD                       |
| Schizophrenia              |

## eAppendix 1. Methods Details

Event study specifications were as follows:

$$Y_{i,m} = \beta_0 + \beta_1 \text{TabletRecipient}_i + \beta_{2-21}(\text{month relative to tablet shipment})_{i,m} + \beta_{22} \text{gender}_i \\ + \beta_{23} \text{race}_i + \beta_{24} \text{ethnicity}_i + \beta_{25} \text{age}_i \\ + \beta_{26} \text{NumMHconds}_i + \beta_{27} \text{NumPHYSconds}_i + \beta_{28} \text{Depression}_i + \beta_{29} \text{PTSD}_i \\ + \beta_{30} \text{SUD}_i + \beta_{31} \text{CANscore}_i + \beta_{32} \text{VApriority}_i + \beta_{33} \text{maritalstatus}_i \\ + \beta_{34} \text{reachvetstatus}_i + \beta_{35} \text{reachvetstatus}_i \\ + \beta_{36} \text{cumltv covid cases in county}_{i,m} + \text{closestSCfacilityFES}_i \\ + \text{monthyearFES}_m + \varepsilon$$

where  $Y_{i,m}$  is the outcome of interest,  $i$  denotes an individual, and  $m$  denotes months.  $\beta_{2-21}$  were the coefficients of interest which reflect the tablet associations in each month pre- and post- tablet shipment. These coefficients were plotted on the event study graphs to illustrate the tablet associations. Month relative to tablet shipment was calculated as the tablet shipment month minus the observation month, such that relative month = 0 is the month in which a tablet was shipped to a veteran, and relative month = -1 was the month just prior to tablet shipment, and so on. Note that we excluded relative months = -1 and = 0 from the analysis because treatment assignment i.e. tablet assignment likely occurred in these months and we did not want to attribute tablet assignment-related visits to tablet-associated effects. Excluding month 0 also allowed for visits related to tablet set-up to be omitted. We thus used relative month = -2, i.e. 2 months prior to tablet shipment, as the baseline month, which marks the end of the pre-tablet period. The post-tablet period begins with relative month = 1, i.e. one month after tablet was shipped to veterans.

To obtain the usual DiD estimate, we used the following specification:

$$Y_{i,m} = \beta_0 + \beta_1 \text{TabletRecipient}_i + \beta_2 (\text{TabletRecipient} * \text{PostTabletShipment})_{i,m} + \beta_3 \text{gender}_i \\ + \beta_4 \text{race}_i + \beta_5 \text{ethnicity}_i + \beta_6 \text{age}_i + \beta_7 \text{NumMHconds}_i + \beta_8 \text{NumPHYSconds}_i \\ + \beta_9 \text{Depression}_i + \beta_{10} \text{PTSD}_i + \beta_{11} \text{SUD}_i + \beta_{12} \text{CANscore}_i + \beta_{13} \text{VApriority}_i \\ + \beta_{14} \text{maritalstatus}_i + \beta_{15} \text{reachvetstatus}_i + \beta_{16} \text{reachvetstatus}_i \\ + \beta_{17} \text{cumltv covid cases in county}_{i,m} + \text{closestSCfacilityFES}_i \\ + \text{monthyearFES}_m + \varepsilon$$

where all of the variables were the same as in the event study specification, except that the “month relative to tablet shipment” variable was replaced with the variable “TabletRecipient \* PostTabletShipment,” an interaction of indicators for tablet recipient (vs. non-recipient) and for post- (vs. pre-) tablet shipment observation. The coefficient on this interaction term,  $\beta_2$ , was the coefficient of interest and was the DiD estimate.

## eFigure 2. Tablet Recipients' Visits for Medication Management and CSRES Compared to The Baseline and Compared to Non-Recipients - Regression Coefficients From Event Study Specifications

Below are event study graphs showing tablet-associations for medication management visits and visits for CSREs across all modalities. In an event study analysis, without a significant visual break in the difference in the pattern of visits pre- and post-tablets, we cannot claim any significant associations between tablets and mental health service use. In eFigure 2, the graph to the left shows that there was a slight upward trend in the difference in medication management visits for tablet recipients compared to non-recipients prior to tablet shipment, a trend that may have continued post-tablets. The graph on the right (eFigure 2) shows that the difference in visits for CSREs for tablet recipients compared to non-recipients was increasing slightly prior to tablet shipment, and post-tablets, the pattern in the difference in visits for tablet recipients does not differ abruptly from the pattern in the pre-tablet period. As such, we cannot claim any significant tablet-associations for these outcomes.

eFigure 2: Tablet recipients' visits for medication management and CSREs compared to the baseline and compared to non-recipients - regression coefficients from event study specifications

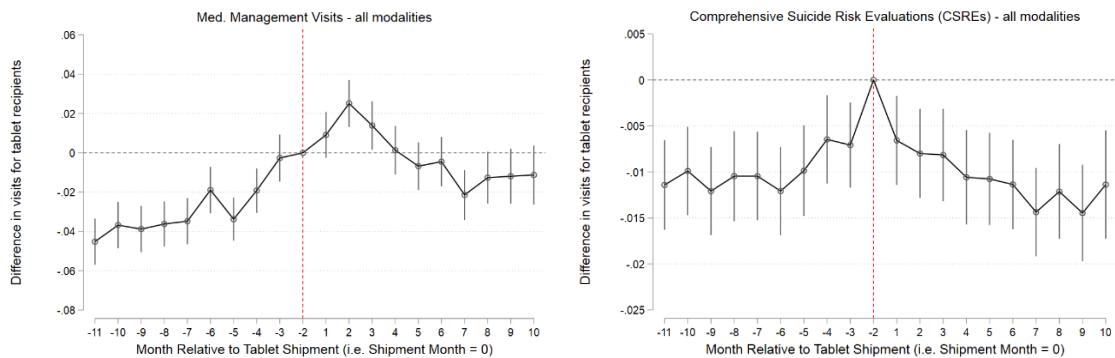

eFigure 3. Unadjusted average number of monthly visit outcomes for rural tablet recipients and rural tablet non-recipients by calendar month-year

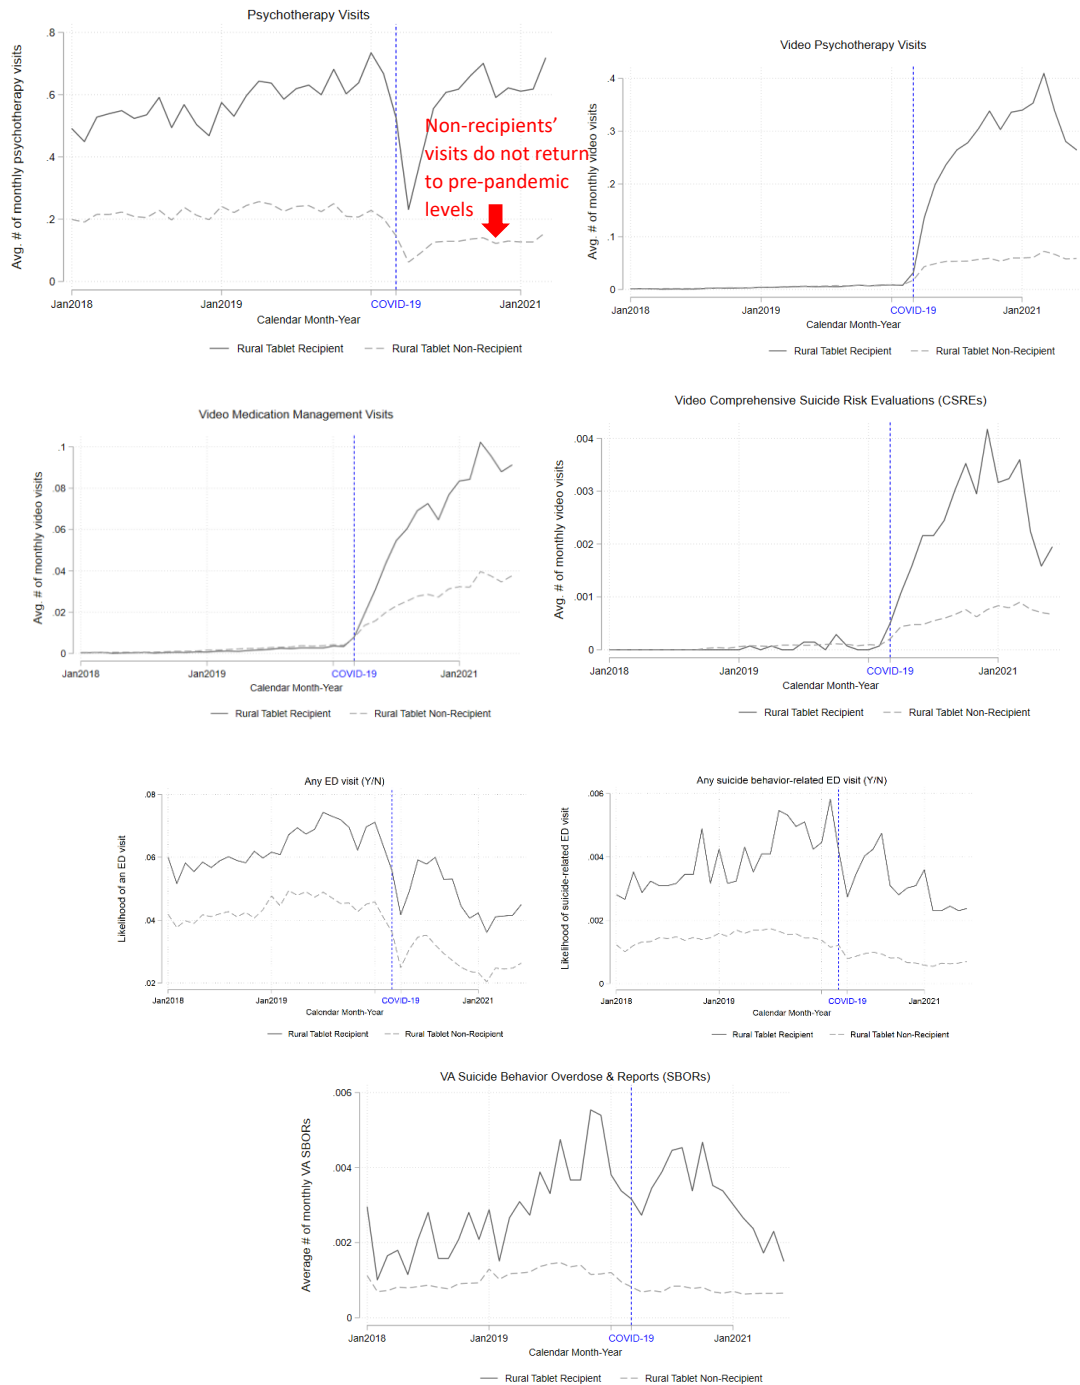

Supplement: jamanetwopen-e226250-s001.pdf [file jamanetwopen-e226250-s001.pdf]
